# Supplementary material for: Transcriptome and Comparative Gene Expression Analysis of Sogatella furcifera (Horváth) in Response to Southern Rice Black-Streaked Dwarf Virus
Source: PLoS One. 2012 Apr 27;7(4):e36238. doi: 10.1371/journal.pone.0036238 (PMC3338671; doi:10.1371/journal.pone.0036238)
Supplement: Table S1 — Annotation of GenBank database searches. This table shows the results about searching the reference sequences using BLASTX against the non-redundant (nr) NCBI database with a cut-off E-value of 10−5. (XLSX) [file pone.0036238.s001.xlsx]

## Sheet: 复件 All-Unigene.fa.blast.Nr
Query_id	Query_length	E_value	Subject_annotation
Unigene13934_All	1090	7e-74	AGAP010443-PA [Anopheles gambiae str. PEST] >gi|116129978|gb|EAA07179.3| AGAP010443-PA [Anopheles gambiae str. PEST]
Unigene13934_All	1090	1e-73	PREDICTED: similar to cytochrome c oxidase assembly protein cox11 [Tribolium castaneum]
Unigene13934_All	1090	6e-73	cytochrome c oxidase assembly protein COX11, mitochondrial [Culex quinquefasciatus] >gi|167878513|gb|EDS41896.1| cytochrome c oxidase assembly protein COX11, mitochondrial [Culex quinquefasciatus]
Unigene13934_All	1090	5e-72	CG31648 [Drosophila melanogaster] >gi|22945671|gb|AAF52256.2| CG31648 [Drosophila melanogaster] >gi|40882501|gb|AAR96162.1| RE57459p [Drosophila melanogaster] >gi|220950848|gb|ACL87967.1| CG31648-PA [synthetic construct] >gi|220959534|gb|ACL92310.1| CG31648-PA [synthetic construct]
Unigene13934_All	1090	6e-72	cytochrome c oxidase assembly protein cox11 [Aedes aegypti] >gi|108877373|gb|EAT41598.1| cytochrome c oxidase assembly protein cox11 [Aedes aegypti]
Unigene13934_All	1090	8e-72	PREDICTED: similar to ENSANGP00000022656 [Nasonia vitripennis]
Unigene13934_All	1090	2e-71	GD23348 [Drosophila simulans] >gi|194190253|gb|EDX03829.1| GD23348 [Drosophila simulans]
Unigene13934_All	1090	4e-70	COX11 homolog, cytochrome c oxidase assembly protein [Danio rerio] >gi|292623282|ref|XP_002665254.1| PREDICTED: COX11 homolog, cytochrome c oxidase assembly protein-like [Danio rerio] >gi|126631529|gb|AAI33934.1| Zgc:162286 protein [Danio rerio]
Unigene13934_All	1090	7e-70	PREDICTED: similar to cytochrome c oxidase assembly protein cox11 [Acyrthosiphon pisum]
Unigene13934_All	1090	1e-68	PREDICTED: similar to COX11 homolog, cytochrome c oxidase assembly protein (yeast) [Gallus gallus]
Unigene13934_All	1090	2e-68	Cytochrome c oxidase assembly protein COX11, mitochondrial precursor [Salmo salar]
Unigene13934_All	1090	3e-68	PREDICTED: COX11 homolog, cytochrome c oxidase assembly protein-like [Saccoglossus kowalevskii]
Unigene13934_All	1090	2e-67	PREDICTED: cytochrome c oxidase assembly protein COX11, mitochondrial [Macaca mulatta]
Unigene13934_All	1090	3e-67	PREDICTED: cytochrome c oxidase assembly protein COX11, mitochondrial-like isoform 3 [Pongo abelii]
Unigene13934_All	1090	3e-67	PREDICTED: similar to cytochrome c oxidase assembly protein COX11 [Pan troglodytes]
Unigene13934_All	1090	5e-67	PREDICTED: cytochrome c oxidase assembly protein COX11, mitochondrial-like [Xenopus (Silurana) tropicalis]
Unigene13934_All	1090	5e-67	PREDICTED: cytochrome c oxidase assembly protein COX11, mitochondrial-like [Callithrix jacchus]
Unigene13934_All	1090	5e-67	cytochrome c oxidase assembly protein COX11, mitochondrial isoform 1 [Homo sapiens] >gi|60416378|sp|Q9Y6N1.3|COX11_HUMAN RecName: Full=Cytochrome c oxidase assembly protein COX11, mitochondrial; Flags: Precursor >gi|3170264|gb|AAD08645.1| cytochrome c oxidase assembly protein COX11 [Homo sapiens] >gi|49456631|emb|CAG46636.1| COX11 [Homo sapiens] >gi|60814946|gb|AAX36326.1| COX11-like cytochrome c…
Unigene13934_All	1090	6e-67	cytochrome c oxidase assembly protein COX11, mitochondrial precursor [Bos taurus]
Unigene13934_All	1090	6e-67	cytochrome c oxidase assembly protein COX11, mitochondrial precursor [Bos taurus] >gi|160380564|sp|A3KMZ6.1|COX11_BOVIN RecName: Full=Cytochrome c oxidase assembly protein COX11, mitochondrial; Flags: Precursor >gi|126717455|gb|AAI33445.1| COX11 protein [Bos taurus]
Unigene13939_All	764	4e-09	PREDICTED: anthrax toxin receptor 1-like [Rattus norvegicus]
Unigene13939_All	764	9e-09	PREDICTED: hCG38312-like [Bos taurus] >gi|297473861|ref|XP_002686894.1| PREDICTED: hCG38312-like [Bos taurus] >gi|296488455|gb|DAA30568.1| hCG38312-like [Bos taurus]
Unigene13939_All	764	1e-08	MIP13839p [Drosophila melanogaster]
Unigene13939_All	764	1e-08	CG13731 [Drosophila melanogaster] >gi|28380492|gb|AAF49349.4| CG13731 [Drosophila melanogaster]
Unigene13939_All	764	1e-08	C. briggsae CBR-GRD-7 protein [Caenorhabditis briggsae] >gi|187030745|emb|CAP30251.1| C. briggsae CBR-GRD-7 protein [Caenorhabditis briggsae]
Unigene13939_All	764	2e-08	AGAP011901-PA [Anopheles gambiae str. PEST] >gi|157013331|gb|EDO63344.1| AGAP011901-PA [Anopheles gambiae str. PEST]
Unigene13939_All	764	3e-08	GF24314 [Drosophila ananassae] >gi|190624218|gb|EDV39742.1| GF24314 [Drosophila ananassae]
Unigene13939_All	764	6e-08	PREDICTED: WAS/WASL-interacting protein family member 3-like, partial [Pongo abelii]
Unigene13939_All	764	6e-08	PREDICTED: similar to WAS/WASL interacting protein family, member 3 [Equus caballus]
Unigene13939_All	764	8e-08	AGAP005951-PA [Anopheles gambiae str. PEST] >gi|157015856|gb|EAA11692.4| AGAP005951-PA [Anopheles gambiae str. PEST]
Unigene13939_All	764	8e-08	PREDICTED: similar to proline rich 8 [Ornithorhynchus anatinus]
Unigene13939_All	764	8e-08	hCG38312, isoform CRA_a [Homo sapiens]
Unigene13939_All	764	8e-08	hCG38312, isoform CRA_c [Homo sapiens]
Unigene13939_All	764	8e-08	hCG38312, isoform CRA_b [Homo sapiens]
Unigene13939_All	764	8e-08	WAS/WASL-interacting protein family member 3 [Homo sapiens] >gi|205831242|sp|A6NGB9.3|WIPF3_HUMAN RecName: Full=WAS/WASL-interacting protein family member 3; AltName: Full=Corticosteroids and regional expression protein 16 homolog >gi|162319416|gb|AAI56552.1| WAS/WASL interacting protein family, member 3 [synthetic construct]
Unigene13939_All	764	1e-07	PREDICTED: WAS/WASL-interacting protein family member 3 isoform 1 [Macaca mulatta]
Unigene13939_All	764	2e-07	PREDICTED: anthrax toxin receptor 1-like [Rattus norvegicus]
Unigene13939_All	764	2e-07	GD12411 [Drosophila simulans] >gi|194197267|gb|EDX10843.1| GD12411 [Drosophila simulans]
Unigene13939_All	764	2e-07	GG18108 [Drosophila erecta] >gi|190649333|gb|EDV46611.1| GG18108 [Drosophila erecta]
Unigene13939_All	764	2e-07	GF25073 [Drosophila ananassae] >gi|190623449|gb|EDV38973.1| GF25073 [Drosophila ananassae]
Unigene13940_All	407	3e-59	chromodomain helicase DNA binding protein [Aedes aegypti] >gi|108870421|gb|EAT34646.1| chromodomain helicase DNA binding protein [Aedes aegypti]
Unigene13940_All	407	1e-58	chromodomain helicase-DNA-binding protein 3 [Culex quinquefasciatus] >gi|167879513|gb|EDS42896.1| chromodomain helicase-DNA-binding protein 3 [Culex quinquefasciatus]
Unigene13940_All	407	1e-58	AGAP012009-PA [Anopheles gambiae str. PEST] >gi|157013268|gb|EAA00692.4| AGAP012009-PA [Anopheles gambiae str. PEST]
Unigene13940_All	407	1e-58	PREDICTED: similar to Chromodomain helicase-DNA-binding protein Mi-2 homolog (ATP-dependent helicase Mi-2) (dMi-2) [Apis mellifera]
Unigene13940_All	407	2e-58	PREDICTED: similar to chromodomain helicase DNA binding protein [Nasonia vitripennis]
Unigene13940_All	407	1e-57	GM15785 [Drosophila sechellia] >gi|194127798|gb|EDW49841.1| GM15785 [Drosophila sechellia]
Unigene13940_All	407	1e-57	Mi-2 [Drosophila melanogaster]
Unigene13940_All	407	1e-57	Mi-2 [Drosophila melanogaster]
Unigene13940_All	407	1e-57	Mi-2 [Drosophila melanogaster]
Unigene13940_All	407	1e-57	Mi-2 [Drosophila melanogaster]
Unigene13940_All	407	1e-57	Mi-2 [Drosophila melanogaster] >gi|169648397|gb|ACA62200.1| Mi-2 [Drosophila melanogaster] >gi|169648401|gb|ACA62202.1| Mi-2 [Drosophila melanogaster] >gi|169648403|gb|ACA62203.1| Mi-2 [Drosophila melanogaster] >gi|169648405|gb|ACA62204.1| Mi-2 [Drosophila melanogaster] >gi|169648407|gb|ACA62205.1| Mi-2 [Drosophila melanogaster] >gi|169648409|gb|ACA62206.1| Mi-2 [Drosophila melanogaster] >gi|1696…
Unigene13940_All	407	1e-57	dMi-2 protein [Drosophila melanogaster]
Unigene13940_All	407	1e-57	CHD3 [Drosophila melanogaster]
Unigene13940_All	407	1e-57	LD32039p [Drosophila melanogaster]
Unigene13940_All	407	1e-57	Mi-2, isoform B [Drosophila melanogaster] >gi|61678453|gb|AAX52739.1| Mi-2, isoform B [Drosophila melanogaster]
Unigene13940_All	407	1e-57	Mi-2, isoform A [Drosophila melanogaster] >gi|281366478|ref|NP_001163476.1| Mi-2, isoform C [Drosophila melanogaster] >gi|13124018|sp|O97159.2|CHDM_DROME RecName: Full=Chromodomain-helicase-DNA-binding protein Mi-2 homolog; AltName: Full=ATP-dependent helicase Mi-2; Short=dMi-2 >gi|23093096|gb|AAF49099.2| Mi-2, isoform A [Drosophila melanogaster] >gi|272455249|gb|ACZ94747.1| Mi-2, isoform C [Dros…
Unigene13940_All	407	1e-57	GE22457 [Drosophila yakuba] >gi|194181652|gb|EDW95263.1| GE22457 [Drosophila yakuba]
Unigene13940_All	407	1e-57	GK17504 [Drosophila willistoni] >gi|194158454|gb|EDW73355.1| GK17504 [Drosophila willistoni]
Unigene13940_All	407	1e-57	GJ13998 [Drosophila virilis] >gi|194155645|gb|EDW70829.1| GJ13998 [Drosophila virilis]
Unigene13940_All	407	1e-57	GI13663 [Drosophila mojavensis] >gi|193920350|gb|EDW19217.1| GI13663 [Drosophila mojavensis]
Unigene13941_All	881	1e-36	OGFOD1 protein [Bos taurus]
Unigene13941_All	881	1e-36	2-oxoglutarate and iron-dependent oxygenase domain-containing protein 1 [Bos taurus] >gi|158563809|sp|Q3MI03.2|OGFD1_BOVIN RecName: Full=2-oxoglutarate and iron-dependent oxygenase domain-containing protein 1 >gi|296477954|gb|DAA20069.1| 2-oxoglutarate and iron-dependent oxygenase domain-containing protein 1 [Bos taurus]
Unigene13941_All	881	7e-35	PREDICTED: similar to 2-oxoglutarate and iron-dependent oxygenase domain-containing protein 1 (Termination and polyadenylation 1 homolog) [Equus caballus]
Unigene13941_All	881	1e-34	2-oxoglutarate and iron-dependent oxygenase domain-containing protein 1 [Homo sapiens] >gi|74728942|sp|Q8N543.1|OGFD1_HUMAN RecName: Full=2-oxoglutarate and iron-dependent oxygenase domain-containing protein 1; AltName: Full=Termination and polyadenylation 1 homolog >gi|21410525|gb|AAH32919.1| 2-oxoglutarate and iron-dependent oxygenase domain containing 1 [Homo sapiens] >gi|119603267|gb|EAW82861…
Unigene13941_All	881	1e-34	KIAA1612 protein [Homo sapiens]
Unigene13941_All	881	2e-34	PREDICTED: similar to CG31120-PA, isoform A [Apis mellifera]
Unigene13941_All	881	2e-34	2-oxoglutarate and iron-dependent oxygenase domain-containing protein 1 [Pongo abelii] >gi|75054709|sp|Q5R4R3.1|OGFD1_PONAB RecName: Full=2-oxoglutarate and iron-dependent oxygenase domain-containing protein 1
Unigene13941_All	881	3e-34	PREDICTED: 2-oxoglutarate and iron-dependent oxygenase domain-containing protein 1-like [Ailuropoda melanoleuca]
Unigene13941_All	881	4e-34	PREDICTED: similar to KIAA1612 protein isoform 3 [Pan troglodytes]
Unigene13941_All	881	4e-34	PREDICTED: similar to KIAA1612 protein isoform 4 [Pan troglodytes]
Unigene13941_All	881	8e-34	PREDICTED: similar to CG31120-PA, isoform A isoform 1 [Canis familiaris]
Unigene13941_All	881	1e-33	PREDICTED: similar to KIAA1612 protein isoform 2 [Pan troglodytes]
Unigene13941_All	881	3e-33	PREDICTED: 2-oxoglutarate and iron-dependent oxygenase domain containing 1 [Oryctolagus cuniculus]
Unigene13941_All	881	4e-33	PREDICTED: similar to mKIAA1612 protein [Strongylocentrotus purpuratus] >gi|115965647|ref|XP_001197449.1| PREDICTED: similar to mKIAA1612 protein [Strongylocentrotus purpuratus]
Unigene13941_All	881	3e-32	2-oxoglutarate and iron-dependent oxygenase domain-containing protein 1 isoform 1 [Mus musculus] >gi|123787387|sp|Q3U0K8.1|OGFD1_MOUSE RecName: Full=2-oxoglutarate and iron-dependent oxygenase domain-containing protein 1 >gi|148679167|gb|EDL11114.1| 2-oxoglutarate and iron-dependent oxygenase domain containing 1, isoform CRA_b [Mus musculus]
Unigene13941_All	881	3e-32	mKIAA1612 protein [Mus musculus]
Unigene13941_All	881	3e-32	PREDICTED: similar to LOC514141 protein [Ornithorhynchus anatinus]
Unigene13941_All	881	1e-31	2-oxoglutarate and iron-dependent oxygenase domain containing 1 [Rattus norvegicus]
Unigene13941_All	881	9e-30	PREDICTED: 2-oxoglutarate and iron-dependent oxygenase domain-containing protein 1-like [Macaca mulatta]
Unigene13941_All	881	9e-30	ogfod1 protein [Xenopus (Silurana) tropicalis]
Unigene13942_All	1320	5e-19	PREDICTED: similar to CG2225-PF, isoform F isoform 1 [Apis mellifera]
Unigene13942_All	1320	5e-19	PREDICTED: similar to AGAP009860-PA [Tribolium castaneum]
Unigene13942_All	1320	6e-14	cement precursor protein 3B variant 3 [Phragmatopoma californica]
Unigene13942_All	1320	3e-13	RecName: Full=Uncharacterized protein DDB_G0271670; Flags: Precursor
Unigene13942_All	1320	2e-11	cement precursor protein 3B variant 1 [Phragmatopoma californica]
Unigene13942_All	1320	2e-11	cement precursor protein 3B variant 2 [Phragmatopoma californica]
Unigene13942_All	1320	3e-08	erythrocyte membrane-associated giant protein antigen 332-like protein [Naegleria gruberi] >gi|284095714|gb|EFC49344.1| erythrocyte membrane-associated giant protein antigen 332-like protein [Naegleria gruberi]
Unigene13942_All	1320	5e-08	AGAP009860-PA [Anopheles gambiae str. PEST] >gi|157014068|gb|EAA43550.3| AGAP009860-PA [Anopheles gambiae str. PEST]
Unigene13942_All	1320	1e-07	PREDICTED: similar to BMKETTIN [Tribolium castaneum]
Unigene13942_All	1320	2e-07	erythrocyte binding protein [Trichomonas vaginalis G3]
Unigene13942_All	1320	7e-07	antigen 332 [Plasmodium berghei strain ANKA]
Unigene13942_All	1320	9e-07	PREDICTED: similar to proteophosphoglycan ppg4 [Tribolium castaneum]
Unigene13942_All	1320	1e-06	GH24370 [Drosophila grimshawi] >gi|193892989|gb|EDV91855.1| GH24370 [Drosophila grimshawi]
Unigene13942_All	1320	1e-06	PREDICTED: similar to chromodomain helicase DNA binding protein [Nasonia vitripennis]
Unigene13942_All	1320	2e-06	mucin related 29B [Drosophila melanogaster] >gi|22947112|gb|AAN11165.1| mucin related 29B [Drosophila melanogaster]
Unigene13942_All	1320	2e-06	sallimus, isoform C [Drosophila melanogaster] >gi|172045934|sp|Q9I7U4.3|TITIN_DROME RecName: Full=Titin; AltName: Full=D-Titin; AltName: Full=Kettin >gi|158028409|gb|AAG22226.3| sallimus, isoform C [Drosophila melanogaster]
Unigene13942_All	1320	2e-06	D-Titin [Drosophila melanogaster]
Unigene13942_All	1320	2e-06	TPA: TPA_exp: TITIN [Drosophila melanogaster]
Unigene13942_All	1320	3e-06	zinc finger (C3HC4 type, RING finger) protein [Toxoplasma gondii GT1]
Unigene13942_All	1320	3e-06	LISK family protein kinase [Dictyostelium discoideum AX4] >gi|182662414|sp|Q23915.2|KINX_DICDI RecName: Full=Probable serine/threonine-protein kinase kinX >gi|60467661|gb|EAL65680.1| LISK family protein kinase [Dictyostelium discoideum AX4]
Unigene13943_All	879	9e-27	GI18624 [Drosophila mojavensis] >gi|193911400|gb|EDW10267.1| GI18624 [Drosophila mojavensis]
Unigene13943_All	879	2e-26	GH21024 [Drosophila grimshawi] >gi|193901828|gb|EDW00695.1| GH21024 [Drosophila grimshawi]
Unigene13943_All	879	5e-26	GJ21633 [Drosophila virilis] >gi|194144317|gb|EDW60713.1| GJ21633 [Drosophila virilis]
Unigene13943_All	879	6e-26	GK17878 [Drosophila willistoni] >gi|194164799|gb|EDW79700.1| GK17878 [Drosophila willistoni]
Unigene13943_All	879	8e-26	GA20921 [Drosophila pseudoobscura pseudoobscura] >gi|195170491|ref|XP_002026046.1| GL10080 [Drosophila persimilis] >gi|54636982|gb|EAL26385.1| GA20921 [Drosophila pseudoobscura pseudoobscura] >gi|194110910|gb|EDW32953.1| GL10080 [Drosophila persimilis]
Unigene13943_All	879	2e-25	GE12374 [Drosophila yakuba] >gi|194177285|gb|EDW90896.1| GE12374 [Drosophila yakuba]
Unigene13943_All	879	2e-25	Bcl-2-like protein BUFFY [Drosophila melanogaster]
Unigene13943_All	879	2e-25	buffy [Drosophila melanogaster] >gi|18446990|gb|AAL68086.1| AT16536p [Drosophila melanogaster] >gi|23240333|gb|AAF58628.3| buffy [Drosophila melanogaster] >gi|220949874|gb|ACL87480.1| Buffy-PA [synthetic construct] >gi|220958686|gb|ACL91886.1| Buffy-PA [synthetic construct]
Unigene13943_All	879	2e-25	GM21300 [Drosophila sechellia] >gi|194125395|gb|EDW47438.1| GM21300 [Drosophila sechellia]
Unigene13943_All	879	7e-25	GG20214 [Drosophila erecta] >gi|190659227|gb|EDV56440.1| GG20214 [Drosophila erecta]
Unigene13943_All	879	8e-24	buffy [Culex quinquefasciatus] >gi|167871450|gb|EDS34833.1| buffy [Culex quinquefasciatus]
Unigene13943_All	879	2e-23	Bcl-2-related ovarian killer protein homolog A [Caligus rogercresseyi]
Unigene13943_All	879	3e-22	GF11452 [Drosophila ananassae] >gi|190621843|gb|EDV37367.1| GF11452 [Drosophila ananassae]
Unigene13943_All	879	1e-20	GF11057 [Drosophila ananassae] >gi|190622615|gb|EDV38139.1| GF11057 [Drosophila ananassae]
Unigene13943_All	879	2e-20	anti-apoptotic BCl-2 family protein [Glossina morsitans morsitans]
Unigene13943_All	879	2e-20	GK19537 [Drosophila willistoni] >gi|194158831|gb|EDW73732.1| GK19537 [Drosophila willistoni]
Unigene13943_All	879	4e-20	GJ21634 [Drosophila virilis] >gi|194144318|gb|EDW60714.1| GJ21634 [Drosophila virilis]
Unigene13943_All	879	4e-20	GI18625 [Drosophila mojavensis] >gi|193911399|gb|EDW10266.1| GI18625 [Drosophila mojavensis]
Unigene13943_All	879	4e-20	Bcl-2 associated protein [Culex quinquefasciatus] >gi|167871449|gb|EDS34832.1| Bcl-2 associated protein [Culex quinquefasciatus]
Unigene13943_All	879	4e-20	Bcl-2 family member protein [Drosophila melanogaster]
Unigene13944_All	386	2e-12	CG42372, isoform A [Drosophila melanogaster] >gi|194882557|ref|XP_001975377.1| GG20591 [Drosophila erecta] >gi|195334887|ref|XP_002034108.1| GM21683 [Drosophila sechellia] >gi|190658564|gb|EDV55777.1| GG20591 [Drosophila erecta] >gi|194126078|gb|EDW48121.1| GM21683 [Drosophila sechellia] >gi|220902242|gb|ACL83131.1| CG42372, isoform A [Drosophila melanogaster]
Unigene13944_All	386	3e-12	GE11777 [Drosophila yakuba] >gi|194178335|gb|EDW91946.1| GE11777 [Drosophila yakuba]
Unigene13944_All	386	2e-08	CG42372, isoform B [Drosophila melanogaster] >gi|220902243|gb|ACL83132.1| CG42372, isoform B [Drosophila melanogaster]
Unigene13944_All	386	2e-08	GA15649 [Drosophila pseudoobscura pseudoobscura] >gi|198135777|gb|EAL25043.2| GA15649 [Drosophila pseudoobscura pseudoobscura]
Unigene13944_All	386	2e-08	GL10726 [Drosophila persimilis] >gi|194109837|gb|EDW31880.1| GL10726 [Drosophila persimilis]
Unigene13944_All	386	3e-06	GK20726 [Drosophila willistoni] >gi|194157517|gb|EDW72418.1| GK20726 [Drosophila willistoni]
Unigene13945_All	633	5e-46	PREDICTED: similar to muted [Apis mellifera]
Unigene13945_All	633	2e-20	PREDICTED: muted-like [Saccoglossus kowalevskii]
Unigene13945_All	633	5e-17	protein Muted homolog [Gallus gallus] >gi|82082012|sp|Q5ZK77.1|MUTED_CHICK RecName: Full=Protein Muted homolog
Unigene13945_All	633	8e-17	muted [Danio rerio] >gi|66911273|gb|AAH96921.1| Zgc:113385 [Danio rerio]
Unigene13945_All	633	1e-16	GL23376 [Drosophila persimilis] >gi|194102436|gb|EDW24479.1| GL23376 [Drosophila persimilis]
Unigene13945_All	633	1e-16	PREDICTED: similar to muted homolog [Acyrthosiphon pisum]
Unigene13945_All	633	1e-16	Zgc:113385 [Danio rerio]
Unigene13945_All	633	1e-16	GK12991 [Drosophila willistoni] >gi|194169799|gb|EDW84700.1| GK12991 [Drosophila willistoni]
Unigene13945_All	633	2e-16	GA27239 [Drosophila pseudoobscura pseudoobscura] >gi|198131940|gb|EDY68039.1| GA27239 [Drosophila pseudoobscura pseudoobscura]
Unigene13945_All	633	3e-16	GH21141 [Drosophila grimshawi] >gi|193895565|gb|EDV94431.1| GH21141 [Drosophila grimshawi]
Unigene13945_All	633	3e-16	GF18080 [Drosophila ananassae] >gi|190627085|gb|EDV42609.1| GF18080 [Drosophila ananassae]
Unigene13945_All	633	1e-15	PREDICTED: muted homolog [Taeniopygia guttata]
Unigene13945_All	633	2e-15	PREDICTED: similar to muted protein [Ornithorhynchus anatinus]
Unigene13945_All	633	2e-15	protein Muted homolog [Xenopus laevis] >gi|187609758|sp|A1L3H4.1|MUTED_XENLA RecName: Full=Protein Muted homolog >gi|120577440|gb|AAI30101.1| Muted protein [Xenopus laevis]
Unigene13945_All	633	3e-15	protein Muted homolog [Xenopus (Silurana) tropicalis] >gi|187609759|sp|A9ULR1.1|MUTED_XENTR RecName: Full=Protein Muted homolog >gi|163915513|gb|AAI57361.1| muted protein [Xenopus (Silurana) tropicalis] >gi|213624058|gb|AAI70589.1| muted homolog [Xenopus (Silurana) tropicalis] >gi|213627013|gb|AAI70587.1| muted homolog [Xenopus (Silurana) tropicalis]
Unigene13945_All	633	3e-15	GJ23157 [Drosophila virilis] >gi|194151862|gb|EDW67296.1| GJ23157 [Drosophila virilis]
Unigene13945_All	633	3e-15	GI10477 [Drosophila mojavensis] >gi|193917477|gb|EDW16344.1| GI10477 [Drosophila mojavensis]
Unigene13945_All	633	6e-15	Muted protein homolog [Rana catesbeiana]
Unigene13945_All	633	1e-14	CG34131 [Drosophila melanogaster] >gi|113194817|gb|ABI31195.1| CG34131 [Drosophila melanogaster]
Unigene13945_All	633	2e-14	GM26416 [Drosophila sechellia] >gi|194121119|gb|EDW43162.1| GM26416 [Drosophila sechellia]
Unigene13946_All	416	1e-43	PREDICTED: similar to CG30427 CG30427-PC [Acyrthosiphon pisum]
Unigene13946_All	416	6e-32	GI19136 [Drosophila mojavensis] >gi|193910399|gb|EDW09266.1| GI19136 [Drosophila mojavensis]
Unigene13946_All	416	7e-31	GI19138 [Drosophila mojavensis] >gi|193910397|gb|EDW09264.1| GI19138 [Drosophila mojavensis]
Unigene13946_All	416	7e-31	PREDICTED: similar to ENSANGP00000011354 [Nasonia vitripennis]
Unigene13946_All	416	9e-31	GA24530 [Drosophila pseudoobscura pseudoobscura] >gi|198135539|gb|EDY68762.1| GA24530 [Drosophila pseudoobscura pseudoobscura]
Unigene13946_All	416	9e-31	GL10900 [Drosophila persimilis] >gi|194109518|gb|EDW31561.1| GL10900 [Drosophila persimilis]
Unigene13946_All	416	9e-31	CG30427, isoform A [Drosophila melanogaster] >gi|24762788|ref|NP_726500.1| CG30427, isoform D [Drosophila melanogaster] >gi|21645096|gb|AAF47295.2| CG30427, isoform A [Drosophila melanogaster] >gi|21645097|gb|AAM70800.1| CG30427, isoform D [Drosophila melanogaster]
Unigene13946_All	416	1e-30	PREDICTED: similar to AGAP003611-PA [Tribolium castaneum]
Unigene13946_All	416	2e-30	GH22050 [Drosophila grimshawi] >gi|193903671|gb|EDW02538.1| GH22050 [Drosophila grimshawi]
Unigene13946_All	416	3e-30	GJ22271 [Drosophila virilis] >gi|194145438|gb|EDW61834.1| GJ22271 [Drosophila virilis]
Unigene13946_All	416	6e-30	GK20732 [Drosophila willistoni] >gi|194157509|gb|EDW72410.1| GK20732 [Drosophila willistoni]
Unigene13946_All	416	8e-30	GK20734 [Drosophila willistoni] >gi|194157507|gb|EDW72408.1| GK20734 [Drosophila willistoni]
Unigene13946_All	416	8e-30	GL10898 [Drosophila persimilis] >gi|194109520|gb|EDW31563.1| GL10898 [Drosophila persimilis]
Unigene13946_All	416	8e-30	PREDICTED: similar to CG30427 CG30427-PC [Acyrthosiphon pisum]
Unigene13946_All	416	1e-29	GF11526 [Drosophila ananassae] >gi|190621714|gb|EDV37238.1| GF11526 [Drosophila ananassae]
Unigene13946_All	416	5e-29	GA24528 [Drosophila pseudoobscura pseudoobscura] >gi|198135541|gb|EDY68764.1| GA24528 [Drosophila pseudoobscura pseudoobscura]
Unigene13946_All	416	5e-29	GD24908 [Drosophila simulans] >gi|194195064|gb|EDX08640.1| GD24908 [Drosophila simulans]
Unigene13946_All	416	5e-29	GG19877 [Drosophila erecta] >gi|190659883|gb|EDV57096.1| GG19877 [Drosophila erecta]
Unigene13946_All	416	5e-29	CG30427, isoform C [Drosophila melanogaster] >gi|21645094|gb|AAM70799.1| CG30427, isoform C [Drosophila melanogaster]
Unigene13946_All	416	8e-29	GE11401 [Drosophila yakuba] >gi|194179017|gb|EDW92628.1| GE11401 [Drosophila yakuba]
Unigene13949_All	1122	8e-17	PREDICTED: 1-phosphatidylinositol-4,5-bisphosphate phosphodiesterase beta-2-like [Rattus norvegicus]
Unigene13949_All	1122	1e-15	PREDICTED: similar to Syne-1B [Strongylocentrotus purpuratus]
Unigene13949_All	1122	1e-14	exosome complex exonuclease [Trichomonas vaginalis G3]
Unigene13949_All	1122	2e-14	Hypothetical protein CBG09942 [Caenorhabditis briggsae] >gi|187031407|emb|CAP29468.1| Hypothetical protein CBG09942 [Caenorhabditis briggsae]
Unigene13949_All	1122	5e-14	PREDICTED: similar to chromosome 18 open reading frame 34 [Monodelphis domestica]
Unigene13949_All	1122	5e-14	Hypothetical protein CBG12079 [Caenorhabditis briggsae] >gi|187029905|emb|CAP31116.1| Hypothetical protein CBG12079 [Caenorhabditis briggsae]
Unigene13949_All	1122	6e-14	erythrocyte binding protein [Trichomonas vaginalis G3]
Unigene13949_All	1122	1e-13	PREDICTED: similar to diacylglycerol kinase, eta [Mus musculus]
Unigene13949_All	1122	2e-13	retrotransposon-like protein 1 [Mus musculus] >gi|81865170|sp|Q7M732.1|RTL1_MOUSE RecName: Full=Retrotransposon-like protein 1; AltName: Full=Retrotransposon-derived protein PEG11; AltName: Full=Paternally expressed gene 11 protein; AltName: Full=Mammalian retrotransposon derived protein 1 >gi|31621286|tpg|DAA01153.1| TPA_exp: RTl1 [Mus musculus] >gi|193735071|gb|ACF20046.1| retrotransposon-like …
Unigene13949_All	1122	3e-13	PREDICTED: similar to mucin [Mus musculus]
Unigene13949_All	1122	3e-13	conserved Plasmodium protein [Plasmodium falciparum 3D7] >gi|23497000|gb|AAN36551.1| conserved Plasmodium protein [Plasmodium falciparum 3D7]
Unigene13949_All	1122	4e-13	PREDICTED: similar to hCG2036628 [Mus musculus]
Unigene13949_All	1122	4e-13	LRRGT00184 [Rattus norvegicus]
Unigene13949_All	1122	4e-13	membrane associated thioredoxin [Cryptosporidium parvum Iowa II] >gi|46227005|gb|EAK87955.1| membrane associated thioredoxin [Cryptosporidium parvum Iowa II]
Unigene13949_All	1122	5e-13	Glutamic acid-rich protein precursor >gi|160299|gb|AAA29605.1| glutamic acid-rich protein [Plasmodium falciparum]
Unigene13949_All	1122	5e-13	transmembrane protein 17 [Cryptosporidium hominis TU502] >gi|54658565|gb|EAL37199.1| transmembrane protein 17 [Cryptosporidium hominis]
Unigene13949_All	1122	7e-13	PREDICTED: similar to ARE1 [Mus musculus]
Unigene13949_All	1122	9e-13	PREDICTED: similar to initiation factor 4D [Mus musculus]
Unigene13949_All	1122	1e-12	cyclic nucleotide-gated cation channel beta-1 [Rattus norvegicus] >gi|2292986|emb|CAA04133.1| cyclic nucleotide-gated channel beta subunit [Rattus norvegicus]
Unigene13949_All	1122	2e-12	PREDICTED: similar to transcript Y 7 [Pan troglodytes] >gi|114691751|ref|XP_001138991.1| PREDICTED: similar to transcript Y 7 [Pan troglodytes]
Unigene13951_All	680	5e-31	PREDICTED: similar to CG31248-PA [Apis mellifera]
Unigene13951_All	680	3e-27	AGAP001449-PA [Anopheles gambiae str. PEST] >gi|157012755|gb|EAA01726.4| AGAP001449-PA [Anopheles gambiae str. PEST]
Unigene13951_All	680	1e-26	PREDICTED: similar to AGAP001449-PA [Tribolium castaneum]
Unigene13951_All	680	2e-25	GF17653 [Drosophila ananassae] >gi|190626272|gb|EDV41796.1| GF17653 [Drosophila ananassae]
Unigene13951_All	680	1e-23	GJ24572 [Drosophila virilis] >gi|194152738|gb|EDW68172.1| GJ24572 [Drosophila virilis]
Unigene13951_All	680	2e-23	GI23060 [Drosophila mojavensis] >gi|193916045|gb|EDW14912.1| GI23060 [Drosophila mojavensis]
Unigene13951_All	680	5e-23	GH19005 [Drosophila grimshawi] >gi|193894014|gb|EDV92880.1| GH19005 [Drosophila grimshawi]
Unigene13951_All	680	3e-22	GL12419 [Drosophila persimilis] >gi|194116074|gb|EDW38117.1| GL12419 [Drosophila persimilis]
Unigene13951_All	680	3e-22	GA16122 [Drosophila pseudoobscura pseudoobscura] >gi|54639491|gb|EAL28893.1| GA16122 [Drosophila pseudoobscura pseudoobscura]
Unigene13951_All	680	1e-21	GE24904 [Drosophila yakuba] >gi|194182799|gb|EDW96410.1| GE24904 [Drosophila yakuba]
Unigene13951_All	680	2e-21	GK14520 [Drosophila willistoni] >gi|194170295|gb|EDW85196.1| GK14520 [Drosophila willistoni]
Unigene13951_All	680	3e-21	GM10934 [Drosophila sechellia] >gi|194133670|gb|EDW55186.1| GM10934 [Drosophila sechellia]
Unigene13951_All	680	6e-21	GG13841 [Drosophila erecta] >gi|190650852|gb|EDV48107.1| GG13841 [Drosophila erecta]
Unigene13951_All	680	7e-20	CG31248 [Drosophila melanogaster] >gi|16768294|gb|AAL28366.1| GH28833p [Drosophila melanogaster] >gi|23170587|gb|AAF54059.2| CG31248 [Drosophila melanogaster] >gi|220944314|gb|ACL84700.1| CG31248-PA [synthetic construct] >gi|220954088|gb|ACL89587.1| CG31248-PA [synthetic construct]
Unigene13951_All	680	5e-13	AGAP010142-PA [Anopheles gambiae str. PEST] >gi|157014243|gb|EAA13843.5| AGAP010142-PA [Anopheles gambiae str. PEST]
Unigene13951_All	680	6e-13	dopamine N-acetyltransferase [Glossina morsitans morsitans]
Unigene13951_All	680	2e-12	GD16609 [Drosophila simulans] >gi|194203366|gb|EDX16942.1| GD16609 [Drosophila simulans]
Unigene13951_All	680	2e-12	GE16262 [Drosophila yakuba] >gi|194187777|gb|EDX01361.1| GE16262 [Drosophila yakuba]
Unigene13951_All	680	2e-12	dopamine N acetyltransferase [Culex quinquefasciatus] >gi|167878472|gb|EDS41855.1| dopamine N acetyltransferase [Culex quinquefasciatus]
Unigene13951_All	680	2e-12	AT19803p [Drosophila melanogaster]
Unigene13952_All	2141	1e-174	PREDICTED: similar to spineless CG6993-PA [Apis mellifera]
Unigene13952_All	2141	1e-160	PREDICTED: similar to GA20013-PA [Nasonia vitripennis]
Unigene13952_All	2141	1e-159	PREDICTED: similar to GA20013-PA [Acyrthosiphon pisum]
Unigene13952_All	2141	1e-141	PREDICTED: similar to spineless CG6993-PA [Tribolium castaneum] >gi|270001263|gb|EEZ97710.1| spineless [Tribolium castaneum]
Unigene13952_All	2141	1e-140	spineless [Tribolium castaneum]
Unigene13952_All	2141	1e-136	aryl hydrocarbon receptor [Aedes aegypti] >gi|108871838|gb|EAT36063.1| aryl hydrocarbon receptor [Aedes aegypti]
Unigene13952_All	2141	1e-136	GK13504 [Drosophila willistoni] >gi|194168856|gb|EDW83757.1| GK13504 [Drosophila willistoni]
Unigene13952_All	2141	1e-136	GD20292 [Drosophila simulans] >gi|194199118|gb|EDX12694.1| GD20292 [Drosophila simulans]
Unigene13952_All	2141	1e-136	Ahr homolog spineless [Drosophila melanogaster]
Unigene13952_All	2141	1e-136	spineless, isoform A [Drosophila melanogaster] >gi|7300141|gb|AAF55308.1| spineless, isoform A [Drosophila melanogaster]
Unigene13952_All	2141	1e-135	spineless, isoform B [Drosophila melanogaster] >gi|272477017|gb|ACZ94925.1| spineless, isoform B [Drosophila melanogaster]
Unigene13952_All	2141	1e-135	GG19993 [Drosophila erecta] >gi|190651882|gb|EDV49137.1| GG19993 [Drosophila erecta]
Unigene13952_All	2141	1e-135	aryl hydrocarbon receptor [Aedes aegypti] >gi|108871836|gb|EAT36061.1| aryl hydrocarbon receptor [Aedes aegypti]
Unigene13952_All	2141	1e-135	GM15436 [Drosophila sechellia] >gi|194122831|gb|EDW44874.1| GM15436 [Drosophila sechellia]
Unigene13952_All	2141	1e-135	GH18248 [Drosophila grimshawi] >gi|193894621|gb|EDV93487.1| GH18248 [Drosophila grimshawi]
Unigene13952_All	2141	1e-134	GA20013 [Drosophila pseudoobscura pseudoobscura] >gi|198132632|gb|EAL28599.2| GA20013 [Drosophila pseudoobscura pseudoobscura]
Unigene13952_All	2141	1e-134	GE26316 [Drosophila yakuba] >gi|194183713|gb|EDW97324.1| GE26316 [Drosophila yakuba]
Unigene13952_All	2141	1e-134	GF16518 [Drosophila ananassae] >gi|190627922|gb|EDV43446.1| GF16518 [Drosophila ananassae]
Unigene13952_All	2141	1e-133	GL22243 [Drosophila persimilis] >gi|194112364|gb|EDW34407.1| GL22243 [Drosophila persimilis]
Unigene13952_All	2141	1e-133	GJ23490 [Drosophila virilis] >gi|194151254|gb|EDW66688.1| GJ23490 [Drosophila virilis]
Unigene13955_All	648	4e-39	PREDICTED: similar to C-type lectin (AGAP002625-PA) [Tribolium castaneum]
Unigene13955_All	648	3e-37	C-type lectin (AGAP002625-PA) [Anopheles gambiae str. PEST] >gi|21295590|gb|EAA07735.1| C-type lectin (AGAP002625-PA) [Anopheles gambiae str. PEST]
Unigene13955_All	648	6e-37	GD19007 [Drosophila simulans] >gi|194199270|gb|EDX12846.1| GD19007 [Drosophila simulans]
Unigene13955_All	648	6e-37	GM24217 [Drosophila sechellia] >gi|194120033|gb|EDW42076.1| GM24217 [Drosophila sechellia]
Unigene13955_All	648	8e-37	CG14866, isoform B [Drosophila melanogaster] >gi|220903095|gb|ACL83515.1| CG14866, isoform B [Drosophila melanogaster]
Unigene13955_All	648	8e-37	GG16910 [Drosophila erecta] >gi|190651734|gb|EDV48989.1| GG16910 [Drosophila erecta]
Unigene13955_All	648	8e-37	CG14866, isoform A [Drosophila melanogaster] >gi|7299994|gb|AAF55166.1| CG14866, isoform A [Drosophila melanogaster] >gi|17945579|gb|AAL48841.1| RE26319p [Drosophila melanogaster] >gi|220957498|gb|ACL91292.1| CG14866-PA [synthetic construct] >gi|220960154|gb|ACL92613.1| CG14866-PA [synthetic construct]
Unigene13955_All	648	1e-36	GE24293 [Drosophila yakuba] >gi|194183865|gb|EDW97476.1| GE24293 [Drosophila yakuba]
Unigene13955_All	648	1e-36	GA13305 [Drosophila pseudoobscura pseudoobscura] >gi|198133146|gb|EAL29056.2| GA13305 [Drosophila pseudoobscura pseudoobscura]
Unigene13955_All	648	1e-36	GL12545 [Drosophila persimilis] >gi|194116302|gb|EDW38345.1| GL12545 [Drosophila persimilis]
Unigene13955_All	648	4e-36	GF11486 [Drosophila ananassae] >gi|190619777|gb|EDV35301.1| GF11486 [Drosophila ananassae]
Unigene13955_All	648	1e-35	PREDICTED: similar to CG14866-PA [Apis mellifera]
Unigene13955_All	648	2e-35	GK13798 [Drosophila willistoni] >gi|194168892|gb|EDW83793.1| GK13798 [Drosophila willistoni]
Unigene13955_All	648	2e-35	GJ23213 [Drosophila virilis] >gi|194151776|gb|EDW67210.1| GJ23213 [Drosophila virilis]
Unigene13955_All	648	3e-35	GH18859 [Drosophila grimshawi] >gi|193893739|gb|EDV92605.1| GH18859 [Drosophila grimshawi]
Unigene13955_All	648	5e-35	GI22930 [Drosophila mojavensis] >gi|193916288|gb|EDW15155.1| GI22930 [Drosophila mojavensis]
Unigene13955_All	648	7e-19	GG16911 [Drosophila erecta] >gi|190651736|gb|EDV48991.1| GG16911 [Drosophila erecta]
Unigene13955_All	648	3e-08	C-type lectin 2 like protein [Crassostrea gigas]
Unigene13955_All	648	1e-07	PREDICTED: oxidized low-density lipoprotein receptor 1-like isoform 1 [Pongo abelii] >gi|297691139|ref|XP_002822952.1| PREDICTED: oxidized low-density lipoprotein receptor 1-like isoform 2 [Pongo abelii]
Unigene13955_All	648	1e-07	PREDICTED: oxidized low-density lipoprotein receptor 1-like [Macaca mulatta]
Unigene13957_All	792	1e-78	PREDICTED: similar to LOC100049152 protein [Nasonia vitripennis]
Unigene13957_All	792	2e-78	PREDICTED: similar to missing oocyte CG7074-PA [Tribolium castaneum] >gi|270014278|gb|EFA10726.1| missing oocyte-like protein [Tribolium castaneum]
Unigene13957_All	792	2e-78	missing oocyte-like protein [Tribolium castaneum]
Unigene13957_All	792	2e-72	PREDICTED: similar to missing oocyte CG7074-PA [Apis mellifera]
Unigene13957_All	792	8e-55	PREDICTED: missing oocyte-like [Saccoglossus kowalevskii]
Unigene13957_All	792	7e-53	WD repeat-containing protein mio [Danio rerio] >gi|82241816|sp|Q802U2.1|MIO_DANRE RecName: Full=WD repeat-containing protein mio >gi|28502814|gb|AAH47198.1| Missing oocyte, meiosis regulator, homolog (Drosophila) [Danio rerio]
Unigene13957_All	792	2e-52	LOC100145742 protein [Xenopus (Silurana) tropicalis]
Unigene13957_All	792	5e-52	WD repeat-containing protein mio-B [Xenopus laevis] >gi|182662406|sp|A4QNS7.1|MIOB_XENLA RecName: Full=WD repeat-containing protein mio-B >gi|141796348|gb|AAI39502.1| LOC100049152 protein [Xenopus laevis]
Unigene13957_All	792	1e-51	WD repeat-containing protein mio-A [Xenopus laevis] >gi|82233031|sp|Q5U5D4.1|MIOA_XENLA RecName: Full=WD repeat-containing protein mio-A >gi|54311181|gb|AAH84750.1| LOC495294 protein [Xenopus laevis]
Unigene13957_All	792	2e-51	PREDICTED: missing oocyte, meiosis regulator, homolog [Oryctolagus cuniculus]
Unigene13957_All	792	4e-51	PREDICTED: WD repeat-containing protein mio-like [Ailuropoda melanoleuca]
Unigene13957_All	792	4e-51	PREDICTED: LOW QUALITY PROTEIN: WD repeat-containing protein mio-like [Callithrix jacchus]
Unigene13957_All	792	4e-51	PREDICTED: similar to missing oocyte CG7074-PA [Equus caballus]
Unigene13957_All	792	4e-51	PREDICTED: similar to CG7074-PA isoform 2 [Canis familiaris] >gi|73975855|ref|XP_539433.2| PREDICTED: similar to CG7074-PA isoform 1 [Canis familiaris]
Unigene13957_All	792	4e-51	WD repeat-containing protein mio [Pongo abelii] >gi|75070829|sp|Q5RCA2.1|MIO_PONAB RecName: Full=WD repeat-containing protein mio
Unigene13957_All	792	5e-51	missing oocyte, meiosis regulator-like protein [Sus scrofa]
Unigene13957_All	792	5e-51	WD repeat-containing protein mio [Bos taurus] >gi|297473614|ref|XP_002686716.1| PREDICTED: missing oocyte, meiosis regulator, homolog (Drosophila) [Bos taurus] >gi|296488646|gb|DAA30759.1| missing oocyte, meiosis regulator, homolog [Bos taurus]
Unigene13957_All	792	5e-51	WD repeat-containing protein mio [Homo sapiens] >gi|182662411|sp|Q9NXC5.2|MIO_HUMAN RecName: Full=WD repeat-containing protein mio >gi|187954543|gb|AAI40834.1| Missing oocyte, meiosis regulator, homolog (Drosophila) [Homo sapiens] >gi|187954973|gb|AAI40835.1| Missing oocyte, meiosis regulator, homolog (Drosophila) [Homo sapiens]
Unigene13957_All	792	5e-51	PREDICTED: WD repeat-containing protein mio isoform 2 [Macaca mulatta] >gi|109067380|ref|XP_001087701.1| PREDICTED: WD repeat-containing protein mio isoform 4 [Macaca mulatta]
Unigene13957_All	792	9e-51	cDNA sequence BC020002, isoform CRA_b [Mus musculus]
Unigene13959_All	1035	2e-33	PREDICTED: similar to CG3645-PA, isoform A isoform 2 [Apis mellifera]
Unigene13959_All	1035	6e-26	GK21068 [Drosophila willistoni] >gi|194165332|gb|EDW80233.1| GK21068 [Drosophila willistoni]
Unigene13959_All	1035	1e-25	GI15071 [Drosophila mojavensis] >gi|193912359|gb|EDW11226.1| GI15071 [Drosophila mojavensis]
Unigene13959_All	1035	9e-25	GJ17245 [Drosophila virilis] >gi|194148346|gb|EDW64044.1| GJ17245 [Drosophila virilis]
Unigene13959_All	1035	9e-25	GH10223 [Drosophila grimshawi] >gi|193905113|gb|EDW03980.1| GH10223 [Drosophila grimshawi]
Unigene13959_All	1035	3e-24	GD22974 [Drosophila simulans] >gi|194189619|gb|EDX03195.1| GD22974 [Drosophila simulans]
Unigene13959_All	1035	3e-24	GM16686 [Drosophila sechellia] >gi|194123324|gb|EDW45367.1| GM16686 [Drosophila sechellia]
Unigene13959_All	1035	3e-24	CG17075 [Drosophila simulans]
Unigene13959_All	1035	3e-24	CG17075 [Drosophila simulans]
Unigene13959_All	1035	3e-24	CG17075 [Drosophila melanogaster]
Unigene13959_All	1035	3e-24	CG17075 [Drosophila melanogaster] >gi|7296233|gb|AAF51524.1| CG17075 [Drosophila melanogaster]
Unigene13959_All	1035	8e-24	GE16316 [Drosophila yakuba] >gi|194173498|gb|EDW87109.1| GE16316 [Drosophila yakuba]
Unigene13959_All	1035	8e-24	GG24668 [Drosophila erecta] >gi|190660009|gb|EDV57201.1| GG24668 [Drosophila erecta]
Unigene13959_All	1035	8e-24	CG17075 [Drosophila yakuba]
Unigene13959_All	1035	8e-24	CG17075 [Drosophila yakuba]
Unigene13959_All	1035	8e-24	CG17075 [Drosophila erecta]
Unigene13959_All	1035	1e-23	GF22863 [Drosophila ananassae] >gi|190617568|gb|EDV33092.1| GF22863 [Drosophila ananassae]
Unigene13959_All	1035	3e-23	GA14311 [Drosophila pseudoobscura pseudoobscura] >gi|198137828|gb|EAL34532.2| GA14311 [Drosophila pseudoobscura pseudoobscura]
Unigene13959_All	1035	3e-23	GL25829 [Drosophila persimilis] >gi|194114816|gb|EDW36859.1| GL25829 [Drosophila persimilis]
Unigene13959_All	1035	4e-23	PREDICTED: zinc finger, DHHC-type containing 11-like [Saccoglossus kowalevskii]
Unigene13960_All	478	1e-09	Protein kinase domain containing protein [Tetrahymena thermophila] >gi|89291112|gb|EAR89100.1| Protein kinase domain containing protein [Tetrahymena thermophila SB210]
Unigene13960_All	478	1e-09	RecName: Full=GATA zinc finger domain-containing protein 14
Unigene13960_All	478	2e-09	CG15040 [Drosophila melanogaster] >gi|7293488|gb|AAF48863.1| CG15040 [Drosophila melanogaster]
Unigene13960_All	478	2e-09	GJ19251 [Drosophila virilis] >gi|194149729|gb|EDW65420.1| GJ19251 [Drosophila virilis]
Unigene13960_All	478	2e-09	RecName: Full=Putative uncharacterized protein DDB_G0280065
Unigene13960_All	478	5e-09	cuticular protein analogous to peritrophins 1-I [Tribolium castaneum] >gi|268373732|gb|ACZ04319.1| CPAP1-I [Tribolium castaneum]
Unigene13960_All	478	5e-09	AGAP004367-PA [Anopheles gambiae str. PEST] >gi|157017268|gb|EAA09199.5| AGAP004367-PA [Anopheles gambiae str. PEST]
Unigene13960_All	478	5e-09	Aa2-050 [Rattus norvegicus]
Unigene13960_All	478	7e-09	RNA recognition motif 2 family protein [Tetrahymena thermophila] >gi|146146339|gb|EAR89529.2| RNA recognition motif 2 family protein [Tetrahymena thermophila SB210]
Unigene13960_All	478	7e-09	SNF2 family N-terminal domain containing protein [Trichomonas vaginalis G3] >gi|121884245|gb|EAX89981.1| SNF2 family N-terminal domain containing protein [Trichomonas vaginalis G3]
Unigene13960_All	478	1e-08	RecName: Full=Putative uncharacterized protein DDB_G0286901
Unigene13960_All	478	1e-08	protein kinase 4 [Dictyostelium discoideum AX4] >gi|161784327|sp|P34103.2|PK4_DICDI RecName: Full=Protein kinase 4 >gi|60467398|gb|EAL65426.1| protein kinase 4 [Dictyostelium discoideum AX4]
Unigene13960_All	478	1e-08	SH2 domain-containing protein [Dictyostelium discoideum AX4] >gi|60473383|gb|EAL71329.1| SH2 domain-containing protein [Dictyostelium discoideum AX4]
Unigene13960_All	478	1e-08	bromodomain-containing protein [Dictyostelium discoideum AX4] >gi|74855714|sp|Q54UW4.1|Y0777_DICDI RecName: Full=Bromodomain-containing protein DDB_G0280777 >gi|60469049|gb|EAL67046.1| bromodomain-containing protein [Dictyostelium discoideum AX4]
Unigene13960_All	478	2e-08	GL23947 [Drosophila persimilis] >gi|194102056|gb|EDW24099.1| GL23947 [Drosophila persimilis]
Unigene13960_All	478	2e-08	Protein kinase domain containing protein [Tetrahymena thermophila] >gi|89302360|gb|EAS00348.1| Protein kinase domain containing protein [Tetrahymena thermophila SB210]
Unigene13960_All	478	2e-08	DEAD/DEAH box helicase [Dictyostelium discoideum AX4] >gi|60471983|gb|EAL69937.1| DEAD/DEAH box helicase [Dictyostelium discoideum AX4]
Unigene13960_All	478	4e-08	SNF2-related domain-containing protein [Dictyostelium discoideum AX4] >gi|60474939|gb|EAL72876.1| SNF2-related domain-containing protein [Dictyostelium discoideum AX4]
Unigene13960_All	478	4e-08	RING zinc finger-containing protein [Dictyostelium discoideum AX4] >gi|60472442|gb|EAL70395.1| RING zinc finger-containing protein [Dictyostelium discoideum AX4]
Unigene13960_All	478	9e-08	RecName: Full=Uncharacterized protein DDB_G0287625
Unigene13962_All	455	7e-28	PREDICTED: similar to ENSANGP00000013457 [Nasonia vitripennis]
Unigene13962_All	455	3e-25	PREDICTED: similar to CG14224-PA [Apis mellifera]
Unigene13962_All	455	1e-22	PREDICTED: similar to ubiquilin-1 isoform 1 [Tribolium castaneum]
Unigene13962_All	455	1e-22	AGAP004294-PA [Anopheles gambiae str. PEST] >gi|55240678|gb|EAA09171.2| AGAP004294-PA [Anopheles gambiae str. PEST]
Unigene13962_All	455	5e-21	ubiquilin 1,2 [Aedes aegypti] >gi|108876959|gb|EAT41184.1| ubiquilin 1,2 [Aedes aegypti]
Unigene13962_All	455	7e-21	ubiquilin-1 [Culex quinquefasciatus] >gi|167879885|gb|EDS43268.1| ubiquilin-1 [Culex quinquefasciatus]
Unigene13962_All	455	7e-21	ubiquilin [Drosophila melanogaster] >gi|7293631|gb|AAF49003.1| ubiquilin [Drosophila melanogaster] >gi|21711699|gb|AAM75040.1| LD38919p [Drosophila melanogaster] >gi|220947322|gb|ACL86204.1| Ubqn-PA [synthetic construct] >gi|220956792|gb|ACL90939.1| Ubqn-PA [synthetic construct]
Unigene13962_All	455	1e-20	GH12490 [Drosophila grimshawi] >gi|193900858|gb|EDV99724.1| GH12490 [Drosophila grimshawi]
Unigene13962_All	455	2e-20	GD15764 [Drosophila simulans] >gi|194202676|gb|EDX16252.1| GD15764 [Drosophila simulans]
Unigene13962_All	455	2e-20	GM22982 [Drosophila sechellia] >gi|194134682|gb|EDW56198.1| GM22982 [Drosophila sechellia]
Unigene13962_All	455	3e-20	PREDICTED: similar to CG14224 CG14224-PA [Acyrthosiphon pisum]
Unigene13962_All	455	3e-20	PREDICTED: similar to ubiquilin 1,2 [Tribolium castaneum]
Unigene13962_All	455	3e-19	GJ15961 [Drosophila virilis] >gi|194150634|gb|EDW66318.1| GJ15961 [Drosophila virilis]
Unigene13962_All	455	3e-19	GI11108 [Drosophila mojavensis] >gi|193906704|gb|EDW05571.1| GI11108 [Drosophila mojavensis]
Unigene13962_All	455	5e-19	PREDICTED: Ubiquilin-1-like [Saccoglossus kowalevskii]
Unigene13962_All	455	1e-18	GL18264 [Drosophila persimilis] >gi|194110628|gb|EDW32671.1| GL18264 [Drosophila persimilis]
Unigene13962_All	455	1e-18	GA12838 [Drosophila pseudoobscura pseudoobscura] >gi|54642878|gb|EAL31622.1| GA12838 [Drosophila pseudoobscura pseudoobscura]
Unigene13962_All	455	2e-18	GF20422 [Drosophila ananassae] >gi|190629136|gb|EDV44553.1| GF20422 [Drosophila ananassae]
Unigene13962_All	455	4e-18	GE15866 [Drosophila yakuba] >gi|194188511|gb|EDX02095.1| GE15866 [Drosophila yakuba]
Unigene13962_All	455	1e-17	GG19246 [Drosophila erecta] >gi|190649461|gb|EDV46739.1| GG19246 [Drosophila erecta]
Unigene13963_All	451	1e-19	PREDICTED: zinc finger protein 91 [Equus caballus]
Unigene13963_All	451	1e-19	PREDICTED: similar to Zinc finger protein 271 (Zinc finger protein 7) (HZF7) (Zinc finger protein ZNFphex133) (Epstein-Barr virus-induced zinc finger protein) (ZNF-EB) (CT-ZFP48) (Zinc finger protein dp) (ZNF-dp) [Acyrthosiphon pisum]
Unigene13963_All	451	1e-19	transcription factor sp8,sp9 [Aedes aegypti] >gi|108871203|gb|EAT35428.1| transcription factor sp8,sp9 [Aedes aegypti]
Unigene13963_All	451	2e-19	GK25356 [Drosophila willistoni] >gi|194167112|gb|EDW82013.1| GK25356 [Drosophila willistoni]
Unigene13963_All	451	4e-19	GI15983 [Drosophila mojavensis] >gi|193908990|gb|EDW07857.1| GI15983 [Drosophila mojavensis]
Unigene13963_All	451	6e-19	PREDICTED: zinc finger protein 568-like [Ailuropoda melanoleuca]
Unigene13963_All	451	6e-19	PREDICTED: zinc finger protein 568-like [Macaca mulatta]
Unigene13963_All	451	6e-19	PREDICTED: zinc finger protein 568 [Callithrix jacchus]
Unigene13963_All	451	6e-19	PREDICTED: zinc finger protein 568 [Oryctolagus cuniculus]
Unigene13963_All	451	6e-19	C2H2-type Zn-finger protein [Glossina morsitans morsitans]
Unigene13963_All	451	6e-19	PREDICTED: zinc finger protein 347 [Bos taurus] >gi|297485536|ref|XP_002695000.1| PREDICTED: zinc finger protein 347-like [Bos taurus] >gi|296477695|gb|DAA19810.1| zinc finger protein 347-like [Bos taurus]
Unigene13963_All	451	6e-19	Hypothetical protein Y55F3AM.14 [Caenorhabditis elegans]
Unigene13963_All	451	8e-19	zinc finger and SCAN domains 20 [Mus musculus]
Unigene13963_All	451	8e-19	zinc finger and SCAN domain-containing protein 20 [Mus musculus] >gi|226706709|sp|B2KFW1.2|ZSC20_MOUSE RecName: Full=Zinc finger and SCAN domain-containing protein 20; AltName: Full=Zinc finger protein 31 >gi|123246659|emb|CAM23047.1| zinc finger and SCAN domains 20 [Mus musculus]
Unigene13963_All	451	8e-19	zinc finger protein 31, isoform CRA_f [Mus musculus]
Unigene13963_All	451	8e-19	zinc finger protein 31, isoform CRA_h [Mus musculus]
Unigene13963_All	451	8e-19	zinc finger protein 31, isoform CRA_d [Mus musculus]
Unigene13963_All	451	8e-19	zinc finger protein 31, isoform CRA_i [Mus musculus]
Unigene13963_All	451	8e-19	Zscan20 protein [Mus musculus]
Unigene13963_All	451	8e-19	Zinc finger and SCAN domains 20 [Mus musculus]
Unigene13964_All	842	6e-23	PREDICTED: similar to lipase [Strongylocentrotus purpuratus] >gi|115749823|ref|XP_001202114.1| PREDICTED: similar to lipase [Strongylocentrotus purpuratus] >gi|115954348|ref|XP_001181052.1| PREDICTED: similar to lipase [Strongylocentrotus purpuratus]
Unigene13964_All	842	5e-22	PREDICTED: similar to lipase [Nasonia vitripennis]
Unigene13964_All	842	5e-22	PREDICTED: similar to vitellogenin-1 [Tribolium castaneum]
Unigene13964_All	842	9e-21	PREDICTED: similar to IP11459p [Nasonia vitripennis]
Unigene13964_All	842	1e-20	PREDICTED: similar to vitellogenin-1 [Tribolium castaneum]
Unigene13964_All	842	2e-20	lipase [Helicoverpa armigera]
Unigene13964_All	842	4e-20	PREDICTED: similar to triglyceride lipase [Strongylocentrotus purpuratus]
Unigene13964_All	842	4e-20	PREDICTED: similar to triglyceride lipase, partial [Strongylocentrotus purpuratus]
Unigene13964_All	842	6e-20	AGAP004449-PA [Anopheles gambiae str. PEST] >gi|157017314|gb|EAA09088.4| AGAP004449-PA [Anopheles gambiae str. PEST]
Unigene13964_All	842	1e-19	PREDICTED: similar to MGC83411 protein [Strongylocentrotus purpuratus] >gi|115971477|ref|XP_001193672.1| PREDICTED: similar to MGC83411 protein [Strongylocentrotus purpuratus]
Unigene13964_All	842	2e-19	GE10597 [Drosophila yakuba] >gi|194184951|gb|EDW98562.1| GE10597 [Drosophila yakuba]
Unigene13964_All	842	2e-19	PREDICTED: similar to Chain , Rp2 Lipase [Strongylocentrotus purpuratus] >gi|115932257|ref|XP_001195049.1| PREDICTED: similar to Chain , Rp2 Lipase [Strongylocentrotus purpuratus]
Unigene13964_All	842	3e-19	PREDICTED: similar to MGC83411 protein [Strongylocentrotus purpuratus]
Unigene13964_All	842	3e-19	GM21737 [Drosophila sechellia] >gi|194126169|gb|EDW48212.1| GM21737 [Drosophila sechellia]
Unigene13964_All	842	3e-19	AGAP005103-PA [Anopheles gambiae str. PEST] >gi|157017050|gb|EAA09427.4| AGAP005103-PA [Anopheles gambiae str. PEST]
Unigene13964_All	842	3e-19	PREDICTED: similar to lipase [Nasonia vitripennis]
Unigene13964_All	842	3e-19	PREDICTED: similar to MGC83411 protein [Strongylocentrotus purpuratus]
Unigene13964_All	842	3e-19	GM10144 [Drosophila sechellia] >gi|194123139|gb|EDW45182.1| GM10144 [Drosophila sechellia]
Unigene13964_All	842	3e-19	lipase [Culex quinquefasciatus] >gi|167878407|gb|EDS41790.1| lipase [Culex quinquefasciatus]
Unigene13964_All	842	3e-19	CG17191 [Drosophila melanogaster] >gi|7301530|gb|AAF56651.1| CG17191 [Drosophila melanogaster] >gi|21428676|gb|AAM49998.1| RE51539p [Drosophila melanogaster] >gi|220948948|gb|ACL87017.1| CG17191-PA [synthetic construct] >gi|220957646|gb|ACL91366.1| CG17191-PA [synthetic construct]
Unigene13965_All	714	2e-90	PREDICTED: similar to CG31170-PB, isoform B [Apis mellifera]
Unigene13965_All	714	8e-89	PREDICTED: similar to epsin-like CG31170-PB [Acyrthosiphon pisum]
Unigene13965_All	714	3e-83	AGAP004504-PA [Anopheles gambiae str. PEST] >gi|157017358|gb|EAA09246.5| AGAP004504-PA [Anopheles gambiae str. PEST]
Unigene13965_All	714	1e-82	GE10298 [Drosophila yakuba] >gi|194184384|gb|EDW97995.1| GE10298 [Drosophila yakuba]
Unigene13965_All	714	1e-82	GG11132 [Drosophila erecta] >gi|190656921|gb|EDV54153.1| GG11132 [Drosophila erecta]
Unigene13965_All	714	2e-82	GJ24417 [Drosophila virilis] >gi|194152466|gb|EDW67900.1| GJ24417 [Drosophila virilis]
Unigene13965_All	714	2e-82	GI22384 [Drosophila mojavensis] >gi|193917290|gb|EDW16157.1| GI22384 [Drosophila mojavensis]
Unigene13965_All	714	2e-82	liquid facets-Related, isoform D [Drosophila melanogaster] >gi|220903173|gb|AAN14377.2| liquid facets-Related, isoform D [Drosophila melanogaster]
Unigene13965_All	714	2e-82	GA26538 [Drosophila pseudoobscura pseudoobscura] >gi|198131883|gb|EDY68017.1| GA26538 [Drosophila pseudoobscura pseudoobscura]
Unigene13965_All	714	2e-82	GM26431 [Drosophila sechellia] >gi|194121136|gb|EDW43179.1| GM26431 [Drosophila sechellia]
Unigene13965_All	714	2e-82	epsin-like protein [Drosophila melanogaster]
Unigene13965_All	714	2e-82	liquid facets-Related, isoform C [Drosophila melanogaster] >gi|16767872|gb|AAL28154.1| GH02671p [Drosophila melanogaster] >gi|220903172|gb|AAF55990.4| liquid facets-Related, isoform C [Drosophila melanogaster]
Unigene13965_All	714	4e-82	GL24213 [Drosophila persimilis] >gi|194102509|gb|EDW24552.1| GL24213 [Drosophila persimilis]
Unigene13965_All	714	2e-81	GH20417 [Drosophila grimshawi] >gi|193895439|gb|EDV94305.1| GH20417 [Drosophila grimshawi]
Unigene13965_All	714	2e-81	GH13377 [Drosophila grimshawi] >gi|193892692|gb|EDV91558.1| GH13377 [Drosophila grimshawi]
Unigene13965_All	714	3e-81	GF18447 [Drosophila ananassae] >gi|190627825|gb|EDV43349.1| GF18447 [Drosophila ananassae]
Unigene13965_All	714	3e-81	epsin-like protein [Tribolium castaneum] >gi|270014273|gb|EFA10721.1| epsin-like protein [Tribolium castaneum]
Unigene13965_All	714	5e-81	GK13071 [Drosophila willistoni] >gi|194169660|gb|EDW84561.1| GK13071 [Drosophila willistoni]
Unigene13965_All	714	1e-75	epsin 4/enthoprotin [Aedes aegypti] >gi|108869788|gb|EAT34013.1| epsin 4/enthoprotin [Aedes aegypti]
Unigene13965_All	714	5e-75	PREDICTED: clathrin interactor 1-like [Ailuropoda melanoleuca]
Unigene13966_All	663	1e-06	GD23040 [Drosophila simulans] >gi|194189676|gb|EDX03252.1| GD23040 [Drosophila simulans]
Unigene13966_All	663	5e-06	PREDICTED: similar to laccase 1 [Strongylocentrotus purpuratus] >gi|115621424|ref|XP_001199789.1| PREDICTED: similar to laccase 1 [Strongylocentrotus purpuratus]
Unigene13966_All	663	7e-06	CG2839 [Drosophila melanogaster] >gi|22945532|gb|AAF51469.2| CG2839 [Drosophila melanogaster]
Unigene13966_All	663	9e-06	GM16758 [Drosophila sechellia] >gi|194123384|gb|EDW45427.1| GM16758 [Drosophila sechellia]
Unigene13967_All	1489	1e-107	PREDICTED: similar to prolyl-tRNA synthetase [Tribolium castaneum]
Unigene13967_All	1489	2e-95	probable prolyl-tRNA synthetase, mitochondrial [Danio rerio] >gi|41350986|gb|AAH65673.1| Prolyl-tRNA synthetase (mitochondrial) [Danio rerio]
Unigene13967_All	1489	2e-95	prolyl-tRNA synthetase [Aedes aegypti] >gi|108872928|gb|EAT37153.1| prolyl-tRNA synthetase [Aedes aegypti]
Unigene13967_All	1489	6e-94	GH15069 [Drosophila grimshawi] >gi|193897823|gb|EDV96689.1| GH15069 [Drosophila grimshawi]
Unigene13967_All	1489	5e-93	GF10245 [Drosophila ananassae] >gi|190624361|gb|EDV39885.1| GF10245 [Drosophila ananassae]
Unigene13967_All	1489	2e-92	PREDICTED: similar to Prolyl-tRNA synthetase CG12186-PA [Acyrthosiphon pisum]
Unigene13967_All	1489	2e-92	GJ12980 [Drosophila virilis] >gi|194153775|gb|EDW68959.1| GJ12980 [Drosophila virilis]
Unigene13967_All	1489	3e-92	GA11463 [Drosophila pseudoobscura pseudoobscura] >gi|54642590|gb|EAL31337.1| GA11463 [Drosophila pseudoobscura pseudoobscura]
Unigene13967_All	1489	3e-92	GI12837 [Drosophila mojavensis] >gi|193918864|gb|EDW17731.1| GI12837 [Drosophila mojavensis]
Unigene13967_All	1489	4e-92	AGAP003589-PA [Anopheles gambiae str. PEST] >gi|157017465|gb|EAA08954.3| AGAP003589-PA [Anopheles gambiae str. PEST]
Unigene13967_All	1489	5e-92	GD13380 [Drosophila simulans] >gi|194195394|gb|EDX08970.1| GD13380 [Drosophila simulans]
Unigene13967_All	1489	6e-91	GM14112 [Drosophila sechellia] >gi|194128179|gb|EDW50222.1| GM14112 [Drosophila sechellia]
Unigene13967_All	1489	1e-90	GK12501 [Drosophila willistoni] >gi|194163936|gb|EDW78837.1| GK12501 [Drosophila willistoni]
Unigene13967_All	1489	1e-90	GM03563p [Drosophila melanogaster]
Unigene13967_All	1489	1e-90	GG14505 [Drosophila erecta] >gi|190653085|gb|EDV50328.1| GG14505 [Drosophila erecta]
Unigene13967_All	1489	2e-90	Prolyl-tRNA synthetase [Drosophila melanogaster] >gi|7292265|gb|AAF47674.1| Prolyl-tRNA synthetase [Drosophila melanogaster]
Unigene13967_All	1489	3e-90	GE21696 [Drosophila yakuba] >gi|194180296|gb|EDW93907.1| GE21696 [Drosophila yakuba]
Unigene13967_All	1489	6e-90	PREDICTED: probable prolyl-tRNA synthetase, mitochondrial-like [Callithrix jacchus]
Unigene13967_All	1489	3e-88	PREDICTED: probable prolyl-tRNA synthetase, mitochondrial-like [Macaca mulatta]
Unigene13967_All	1489	3e-88	probable prolyl-tRNA synthetase, mitochondrial precursor [Homo sapiens] >gi|73919761|sp|Q7L3T8.1|SYPM_HUMAN RecName: Full=Probable prolyl-tRNA synthetase, mitochondrial; AltName: Full=Proline--tRNA ligase; Short=ProRS; Flags: Precursor
Unigene13972_All	574	2e-41	PREDICTED: similar to Ubiquitin carboxyl-terminal hydrolase 22 (Ubiquitin thioesterase 22) (Ubiquitin-specific-processing protease 22) (Deubiquitinating enzyme 22) [Apis mellifera]
Unigene13972_All	574	4e-41	ubiquitin carboxyl-terminal hydrolase 22 [Bos taurus] >gi|229558005|sp|P0C8Z3.1|UBP22_BOVIN RecName: Full=Ubiquitin carboxyl-terminal hydrolase 22; AltName: Full=Ubiquitin thioesterase 22; AltName: Full=Ubiquitin-specific-processing protease 22; AltName: Full=Deubiquitinating enzyme 22 >gi|296476572|gb|DAA18687.1| ubiquitin carboxyl-terminal hydrolase 22 [Bos taurus]
Unigene13972_All	574	1e-40	PREDICTED: ubiquitin carboxyl-terminal hydrolase 22-like [Pongo abelii]
Unigene13972_All	574	1e-40	PREDICTED: ubiquitin carboxyl-terminal hydrolase 22 [Macaca mulatta]
Unigene13972_All	574	1e-40	PREDICTED: similar to ubiquitin specific protease 27, X chromosome [Taeniopygia guttata]
Unigene13972_All	574	1e-40	PREDICTED: similar to Chromosome 17 open reading frame 32 [Ornithorhynchus anatinus]
Unigene13972_All	574	1e-40	PREDICTED: similar to Usp27x protein [Monodelphis domestica]
Unigene13972_All	574	1e-40	hCG28655 [Homo sapiens]
Unigene13972_All	574	1e-40	PREDICTED: similar to MGC82781 protein [Gallus gallus]
Unigene13972_All	574	1e-40	USP22 protein [Homo sapiens]
Unigene13972_All	574	1e-40	KIAA1063 protein [Homo sapiens]
Unigene13972_All	574	1e-40	ubiquitin-specific-protease-3-like protein [Takifugu rubripes]
Unigene13972_All	574	1e-40	USP22 protein [Homo sapiens]
Unigene13972_All	574	1e-40	ubiquitin carboxyl-terminal hydrolase 22 [Homo sapiens] >gi|78103328|sp|Q9UPT9.2|UBP22_HUMAN RecName: Full=Ubiquitin carboxyl-terminal hydrolase 22; AltName: Full=Ubiquitin thioesterase 22; AltName: Full=Ubiquitin-specific-processing protease 22; AltName: Full=Deubiquitinating enzyme 22
Unigene13972_All	574	1e-40	USP22 protein [Homo sapiens]
Unigene13972_All	574	1e-40	PREDICTED: similar to Ubiquitin carboxyl-terminal hydrolase 22 (Ubiquitin thiolesterase 22) (Ubiquitin-specific processing protease 22) (Deubiquitinating enzyme 22) [Canis familiaris]
Unigene13972_All	574	2e-40	ubiquitin carboxyl-terminal hydrolase 22-A [Xenopus laevis] >gi|82184225|sp|Q6GNI6.1|UB22A_XENLA RecName: Full=Ubiquitin carboxyl-terminal hydrolase 22-A; AltName: Full=Ubiquitin thioesterase 22-A; AltName: Full=Ubiquitin-specific-processing protease 22-A; AltName: Full=Deubiquitinating enzyme 22-A >gi|49115779|gb|AAH73524.1| MGC82781 protein [Xenopus laevis]
Unigene13972_All	574	3e-40	PREDICTED: ubiquitin carboxyl-terminal hydrolase 22-like [Ailuropoda melanoleuca]
Unigene13972_All	574	4e-40	Usp22 protein [Mus musculus]
Unigene13972_All	574	4e-40	PREDICTED: ubiquitin specific protease 22 [Rattus norvegicus] >gi|293351555|ref|XP_220534.5| PREDICTED: ubiquitin specific protease 22 [Rattus norvegicus]
Unigene13973_All	984	5e-62	PREDICTED: similar to Rab3 GTPase-activating protein catalytic subunit [Apis mellifera]
Unigene13973_All	984	3e-61	PREDICTED: RaB GAP related family member (rbg-1)-like [Saccoglossus kowalevskii]
Unigene13973_All	984	4e-60	PREDICTED: similar to RAB3 GTPase-activating protein [Equus caballus]
Unigene13973_All	984	1e-59	PREDICTED: rab3 GTPase-activating protein catalytic subunit-like [Macaca mulatta]
Unigene13973_All	984	1e-59	rab3 GTPase-activating protein catalytic subunit isoform 1 [Homo sapiens]
Unigene13973_All	984	1e-59	PREDICTED: RAB3 GTPase-activating protein isoform 2 [Pan troglodytes]
Unigene13973_All	984	1e-59	PREDICTED: RAB3 GTPase-activating protein isoform 1 [Pan troglodytes]
Unigene13973_All	984	1e-59	PREDICTED: RAB3 GTPase-activating protein isoform 3 [Pan troglodytes]
Unigene13973_All	984	1e-59	rab3 GTPase-activating protein catalytic subunit isoform 2 [Homo sapiens] >gi|62511099|sp|Q15042.3|RB3GP_HUMAN RecName: Full=Rab3 GTPase-activating protein catalytic subunit; AltName: Full=RAB3 GTPase-activating protein 130 kDa subunit; AltName: Full=Rab3-GAP p130; Short=Rab3-GAP >gi|505100|dbj|BAA06684.1| KIAA0066 [Homo sapiens] >gi|119632046|gb|EAX11641.1| RAB3 GTPase activating protein subunit…
Unigene13973_All	984	3e-59	PREDICTED: rab3 GTPase-activating protein catalytic subunit-like isoform 2 [Ailuropoda melanoleuca]
Unigene13973_All	984	3e-59	PREDICTED: rab3 GTPase-activating protein catalytic subunit-like isoform 1 [Ailuropoda melanoleuca]
Unigene13973_All	984	3e-59	rab3 GTPase-activating protein catalytic subunit [Bos taurus] >gi|133777451|gb|AAI14756.1| RAB3GAP1 protein [Bos taurus] >gi|296490525|gb|DAA32638.1| RAB3 GTPase-activating protein [Bos taurus]
Unigene13973_All	984	4e-59	PREDICTED: RAB3 GTPase-activating protein [Oryctolagus cuniculus]
Unigene13973_All	984	7e-59	PREDICTED: similar to RAB3 GTPase-activating protein isoform 5 [Canis familiaris]
Unigene13973_All	984	7e-59	PREDICTED: similar to RAB3 GTPase-activating protein isoform 1 [Canis familiaris]
Unigene13973_All	984	1e-58	PREDICTED: rab3 GTPase-activating protein catalytic subunit [Pongo abelii]
Unigene13973_All	984	4e-58	rab3 GTPase-activating protein catalytic subunit [Mus musculus]
Unigene13973_All	984	6e-58	rab3 GTPase-activating protein catalytic subunit [Xenopus laevis] >gi|62511110|sp|Q642R9.1|RB3GP_XENLA RecName: Full=Rab3 GTPase-activating protein catalytic subunit >gi|51895812|gb|AAH81089.1| MGC82675 protein [Xenopus laevis]
Unigene13973_All	984	1e-57	mKIAA0066 protein [Mus musculus]
Unigene13973_All	984	1e-57	RecName: Full=Rab3 GTPase-activating protein catalytic subunit; AltName: Full=RAB3 GTPase-activating protein 130 kDa subunit; AltName: Full=Rab3-GAP p130; Short=Rab3-GAP >gi|28374414|gb|AAH46297.1| RAB3 GTPase activating protein subunit 1 [Mus musculus] >gi|148707814|gb|EDL39761.1| RAB3 GTPase activating protein subunit 1 [Mus musculus]
Unigene13974_All	510	1e-34	cathepsin B precursor [Araneus ventricosus]
Unigene13974_All	510	3e-31	PREDICTED: similar to cathepsin B [Ciona intestinalis]
Unigene13974_All	510	4e-31	cathepsin b [Aedes aegypti] >gi|54289254|gb|AAV31917.1| lysosomal cathepsin B [Aedes aegypti] >gi|108874249|gb|EAT38474.1| cathepsin b [Aedes aegypti]
Unigene13974_All	510	6e-31	GA10694 [Drosophila pseudoobscura pseudoobscura] >gi|54642915|gb|EAL31659.1| GA10694 [Drosophila pseudoobscura pseudoobscura]
Unigene13974_All	510	1e-30	PREDICTED: similar to cathepsin B, partial [Hydra magnipapillata]
Unigene13974_All	510	1e-30	GD15875 [Drosophila simulans] >gi|194204277|gb|EDX17853.1| GD15875 [Drosophila simulans]
Unigene13974_All	510	1e-30	GM17589 [Drosophila sechellia] >gi|194126760|gb|EDW48803.1| GM17589 [Drosophila sechellia]
Unigene13974_All	510	2e-30	AGAP004533-PA [Anopheles gambiae str. PEST] >gi|157017381|gb|EAA09183.4| AGAP004533-PA [Anopheles gambiae str. PEST]
Unigene13974_All	510	2e-30	GL19846 [Drosophila persimilis] >gi|194105700|gb|EDW27743.1| GL19846 [Drosophila persimilis]
Unigene13974_All	510	2e-30	GG19486 [Drosophila erecta] >gi|190649876|gb|EDV47154.1| GG19486 [Drosophila erecta]
Unigene13974_All	510	4e-30	cathepsin B-like protease [Nilaparvata lugens]
Unigene13974_All	510	6e-30	similar to Drosophila melanogaster CG10992 [Drosophila yakuba]
Unigene13974_All	510	8e-30	cathepsin B-like cysteine protease [Triatoma infestans]
Unigene13974_All	510	8e-30	cathepsin B-like proteinase [Diabrotica virgifera virgifera]
Unigene13974_All	510	8e-30	cathepsin B-like proteinase [Triatoma sordida]
Unigene13974_All	510	1e-29	cathepsin L [Culex quinquefasciatus] >gi|167879387|gb|EDS42770.1| cathepsin L [Culex quinquefasciatus]
Unigene13974_All	510	1e-29	cathepsin B-like proteinase [Triatoma vitticeps]
Unigene13974_All	510	1e-29	RecName: Full=Cathepsin B; AltName: Full=Cathepsin B1; AltName: Full=RSG-2; Contains: RecName: Full=Cathepsin B light chain; Contains: RecName: Full=Cathepsin B heavy chain; Flags: Precursor >gi|1524328|emb|CAA57792.1| cathepsin b [Rattus norvegicus]
Unigene13974_All	510	2e-29	rCG52258, isoform CRA_b [Rattus norvegicus]
Unigene13974_All	510	2e-29	cathepsin B preproprotein [Rattus norvegicus] >gi|47939014|gb|AAH72490.1| Cathepsin B [Rattus norvegicus] >gi|149030258|gb|EDL85314.1| rCG52258, isoform CRA_a [Rattus norvegicus]
Unigene13975_All	502	1e-15	PREDICTED: similar to formin 1,2/cappuccino [Tribolium castaneum] >gi|270014279|gb|EFA10727.1| cappuccino [Tribolium castaneum]
Unigene13975_All	502	3e-15	PREDICTED: similar to hCG2029577, partial [Ornithorhynchus anatinus]
Unigene13975_All	502	6e-15	hCG1793893 [Homo sapiens]
Unigene13975_All	502	1e-14	AGAP002965-PA [Anopheles gambiae str. PEST] >gi|157017835|gb|EAL40798.3| AGAP002965-PA [Anopheles gambiae str. PEST]
Unigene13975_All	502	2e-14	PREDICTED: similar to One cut domain family member 2 (Transcription factor ONECUT-2) (OC-2) [Apis mellifera]
Unigene13975_All	502	2e-14	diaphanous protein, homolog 1 [Entamoeba histolytica HM-1:IMSS]
Unigene13975_All	502	2e-14	PREDICTED: im:7158925 [Danio rerio]
Unigene13975_All	502	4e-14	PREDICTED: similar to formin 2 [Equus caballus]
Unigene13975_All	502	5e-14	Inverted formin-2 [Entamoeba dispar SAW760]
Unigene13975_All	502	6e-14	PREDICTED: formin 1 [Danio rerio]
Unigene13975_All	502	1e-13	AGAP011901-PA [Anopheles gambiae str. PEST] >gi|157013331|gb|EDO63344.1| AGAP011901-PA [Anopheles gambiae str. PEST]
Unigene13975_All	502	1e-13	PREDICTED: similar to formin 2 [Gallus gallus]
Unigene13975_All	502	1e-13	Wiskott-Aldrich syndrome, like [Danio rerio]
Unigene13975_All	502	1e-13	Wiskott-Aldrich syndrome, like [Danio rerio]
Unigene13975_All	502	1e-13	Wiskott-Aldrich syndrome-like [Danio rerio] >gi|42542479|gb|AAH66424.1| Wiskott-Aldrich syndrome, like [Danio rerio]
Unigene13975_All	502	3e-13	erythrocyte membrane protein 1, PfEMP1 [Plasmodium falciparum 3D7] >gi|23496926|gb|AAN36478.1| erythrocyte membrane protein 1, PfEMP1 [Plasmodium falciparum 3D7]
Unigene13975_All	502	4e-13	GA25909 [Drosophila pseudoobscura pseudoobscura] >gi|198138167|gb|EDY69987.1| GA25909 [Drosophila pseudoobscura pseudoobscura]
Unigene13975_All	502	4e-13	GK25855 [Drosophila willistoni] >gi|194167629|gb|EDW82530.1| GK25855 [Drosophila willistoni]
Unigene13975_All	502	4e-13	GL19302 [Drosophila persimilis] >gi|194106617|gb|EDW28660.1| GL19302 [Drosophila persimilis]
Unigene13975_All	502	4e-13	PREDICTED: similar to CG33556-PA [Strongylocentrotus purpuratus] >gi|115940634|ref|XP_001190680.1| PREDICTED: similar to CG33556-PA [Strongylocentrotus purpuratus]
Unigene13976_All	875	5e-06	NADH dehydrogenase subunit 4 [Anopheles darlingi]
Unigene13976_All	875	5e-06	NADH dehydrogenase subunit 4 [Anopheles darlingi] >gi|260765274|gb|ACX49706.1| NADH dehydrogenase subunit 4 [Anopheles darlingi]
Unigene13976_All	875	7e-06	MAR-binding protein [Polysphondylium pallidum PN500]
Unigene13976_All	875	9e-06	PREDICTED: similar to DNA-directed RNA polymerase II largest subunit [Mus musculus]
Unigene13977_All	1549	3e-85	PREDICTED: similar to ENSANGP00000013316 [Nasonia vitripennis]
Unigene13977_All	1549	1e-81	PREDICTED: similar to AGAP009904-PA [Acyrthosiphon pisum]
Unigene13977_All	1549	2e-81	AGAP009904-PA [Anopheles gambiae str. PEST] >gi|157014099|gb|EAA14079.5| AGAP009904-PA [Anopheles gambiae str. PEST]
Unigene13977_All	1549	6e-79	GE18430 [Drosophila yakuba] >gi|194174265|gb|EDW87876.1| GE18430 [Drosophila yakuba]
Unigene13977_All	1549	4e-78	GK14794 [Drosophila willistoni] >gi|194161289|gb|EDW76190.1| GK14794 [Drosophila willistoni]
Unigene13977_All	1549	5e-78	GD22565 [Drosophila simulans] >gi|194190400|gb|EDX03976.1| GD22565 [Drosophila simulans]
Unigene13977_All	1549	5e-78	GM14132 [Drosophila sechellia] >gi|194129828|gb|EDW51871.1| GM14132 [Drosophila sechellia]
Unigene13977_All	1549	5e-78	GG23610 [Drosophila erecta] >gi|190661901|gb|EDV59093.1| GG23610 [Drosophila erecta]
Unigene13977_All	1549	4e-77	CG9596 [Drosophila melanogaster] >gi|21430464|gb|AAM50910.1| LP06762p [Drosophila melanogaster] >gi|45445030|gb|AAS64646.1| CG9596 [Drosophila melanogaster] >gi|220951984|gb|ACL88535.1| CG9596-PB [synthetic construct]
Unigene13977_All	1549	9e-76	GI18178 [Drosophila mojavensis] >gi|193914510|gb|EDW13377.1| GI18178 [Drosophila mojavensis]
Unigene13977_All	1549	1e-75	GH13028 [Drosophila grimshawi] >gi|193900563|gb|EDV99429.1| GH13028 [Drosophila grimshawi]
Unigene13977_All	1549	1e-75	tRNA methyltransferase [Culex quinquefasciatus] >gi|167872291|gb|EDS35674.1| tRNA methyltransferase [Culex quinquefasciatus]
Unigene13977_All	1549	3e-75	GA28174 [Drosophila pseudoobscura pseudoobscura] >gi|198145101|gb|EDY71805.1| GA28174 [Drosophila pseudoobscura pseudoobscura]
Unigene13977_All	1549	3e-75	GF15697 [Drosophila ananassae] >gi|190616655|gb|EDV32179.1| GF15697 [Drosophila ananassae]
Unigene13977_All	1549	6e-75	GJ14638 [Drosophila virilis] >gi|194147626|gb|EDW63324.1| GJ14638 [Drosophila virilis]
Unigene13977_All	1549	2e-74	GA21902 [Drosophila pseudoobscura pseudoobscura] >gi|198137591|gb|EAL34365.2| GA21902 [Drosophila pseudoobscura pseudoobscura]
Unigene13977_All	1549	2e-74	GL26092 [Drosophila persimilis] >gi|194115110|gb|EDW37153.1| GL26092 [Drosophila persimilis]
Unigene13977_All	1549	4e-74	tRNA MTase subunit TRM6 [Lepeophtheirus salmonis]
Unigene13977_All	1549	7e-65	PREDICTED: tRNA methyltransferase 6 homolog (S. cerevisiae) [Equus caballus]
Unigene13977_All	1549	2e-64	tRNA (adenine-N(1)-)-methyltransferase non-catalytic subunit TRM6 [Bos taurus] >gi|94730586|sp|Q2T9V5.1|TRM6_BOVIN RecName: Full=tRNA (adenine-N(1)-)-methyltransferase non-catalytic subunit TRM6; AltName: Full=tRNA(m1A58)-methyltransferase subunit TRM6; Short=tRNA(m1A58)MTase subunit TRM6 >gi|83405726|gb|AAI11250.1| TRNA methyltransferase 6 homolog (S. cerevisiae) [Bos taurus] >gi|296481056|gb|DA…
Unigene13978_All	567	4e-46	PREDICTED: similar to AGAP002331-PA [Tribolium castaneum]
Unigene13978_All	567	7e-45	PREDICTED: similar to AGAP002331-PA [Acyrthosiphon pisum]
Unigene13978_All	567	6e-39	PREDICTED: similar to Epidermal stripes and patches CG7005-PA [Apis mellifera]
Unigene13978_All	567	1e-37	PREDICTED: similar to ENSANGP00000015362 [Nasonia vitripennis]
Unigene13978_All	567	3e-30	sulfate transporter [Aedes aegypti] >gi|108879174|gb|EAT43399.1| sulfate transporter [Aedes aegypti]
Unigene13978_All	567	5e-30	AGAP002331-PA [Anopheles gambiae str. PEST] >gi|157018235|gb|EAA07491.4| AGAP002331-PA [Anopheles gambiae str. PEST]
Unigene13978_All	567	9e-30	sulfate transporter [Culex quinquefasciatus] >gi|167881215|gb|EDS44598.1| sulfate transporter [Culex quinquefasciatus]
Unigene13978_All	567	1e-28	PREDICTED: similar to CG6928-PB, isoform B isoform 1 [Apis mellifera]
Unigene13978_All	567	2e-28	PREDICTED: similar to ENSANGP00000015362 [Nasonia vitripennis]
Unigene13978_All	567	8e-28	PREDICTED: similar to Epidermal stripes and patches CG7005-PA [Apis mellifera]
Unigene13978_All	567	2e-27	PREDICTED: similar to ENSANGP00000015362 [Nasonia vitripennis]
Unigene13978_All	567	5e-27	PREDICTED: similar to AGAP002331-PA [Tribolium castaneum]
Unigene13978_All	567	3e-26	PREDICTED: similar to AGAP002331-PA [Acyrthosiphon pisum]
Unigene13978_All	567	1e-25	GI23990 [Drosophila mojavensis] >gi|193915068|gb|EDW13935.1| GI23990 [Drosophila mojavensis]
Unigene13978_All	567	2e-25	sulfate transporter [Drosophila melanogaster]
Unigene13978_All	567	2e-25	GA20023 [Drosophila pseudoobscura pseudoobscura] >gi|54637610|gb|EAL27012.1| GA20023 [Drosophila pseudoobscura pseudoobscura]
Unigene13978_All	567	4e-25	GH14116 [Drosophila grimshawi] >gi|193891697|gb|EDV90563.1| GH14116 [Drosophila grimshawi]
Unigene13978_All	567	5e-25	PREDICTED: similar to AGAP002331-PA [Acyrthosiphon pisum]
Unigene13978_All	567	5e-25	PREDICTED: similar to sulfate transporter, partial [Acyrthosiphon pisum]
Unigene13978_All	567	5e-25	PREDICTED: similar to sulfate transporter [Tribolium castaneum]
Unigene13979_All	1433	1e-131	PREDICTED: similar to gh regulated tbc protein-1 [Nasonia vitripennis]
Unigene13979_All	1433	1e-121	PREDICTED: similar to gh regulated tbc protein-1 [Acyrthosiphon pisum]
Unigene13979_All	1433	1e-116	PREDICTED: similar to TBC1 domain family, member 10b [Apis mellifera]
Unigene13979_All	1433	1e-116	PREDICTED: similar to gh regulated tbc protein-1 [Tribolium castaneum]
Unigene13979_All	1433	1e-109	GI10296 [Drosophila mojavensis] >gi|193917159|gb|EDW16026.1| GI10296 [Drosophila mojavensis]
Unigene13979_All	1433	1e-109	gh regulated tbc protein-1 [Culex quinquefasciatus] >gi|167872761|gb|EDS36144.1| gh regulated tbc protein-1 [Culex quinquefasciatus]
Unigene13979_All	1433	1e-108	gh regulated tbc protein-1 [Aedes aegypti] >gi|108880276|gb|EAT44501.1| gh regulated tbc protein-1 [Aedes aegypti]
Unigene13979_All	1433	1e-108	GK14254 [Drosophila willistoni] >gi|194169801|gb|EDW84702.1| GK14254 [Drosophila willistoni]
Unigene13979_All	1433	1e-107	GH23093 [Drosophila grimshawi] >gi|193895987|gb|EDV94853.1| GH23093 [Drosophila grimshawi]
Unigene13979_All	1433	1e-107	GJ11103 [Drosophila virilis] >gi|194143450|gb|EDW59853.1| GJ11103 [Drosophila virilis]
Unigene13979_All	1433	1e-106	GA22257 [Drosophila pseudoobscura pseudoobscura] >gi|198142530|gb|EDY71265.1| GA22257 [Drosophila pseudoobscura pseudoobscura]
Unigene13979_All	1433	1e-106	GA18817 [Drosophila pseudoobscura pseudoobscura] >gi|195157090|ref|XP_002019429.1| GL12234 [Drosophila persimilis] >gi|54639448|gb|EAL28850.1| GA18817 [Drosophila pseudoobscura pseudoobscura] >gi|194116020|gb|EDW38063.1| GL12234 [Drosophila persimilis]
Unigene13979_All	1433	1e-106	GM23956 [Drosophila sechellia] >gi|194120547|gb|EDW42590.1| GM23956 [Drosophila sechellia]
Unigene13979_All	1433	1e-106	GG18255 [Drosophila erecta] >gi|190652249|gb|EDV49504.1| GG18255 [Drosophila erecta]
Unigene13979_All	1433	1e-106	GF18380 [Drosophila ananassae] >gi|190627691|gb|EDV43215.1| GF18380 [Drosophila ananassae]
Unigene13979_All	1433	1e-106	whacked, isoform A [Drosophila melanogaster] >gi|24645988|ref|NP_731593.1| whacked, isoform B [Drosophila melanogaster] >gi|7299471|gb|AAF54659.1| whacked, isoform A [Drosophila melanogaster] >gi|23171013|gb|AAN13513.1| whacked, isoform B [Drosophila melanogaster] >gi|33636567|gb|AAQ23581.1| RE26521p [Drosophila melanogaster] >gi|220951110|gb|ACL88098.1| wkd-PA [synthetic construct] >gi|220959692…
Unigene13979_All	1433	1e-105	GD18765 [Drosophila simulans] >gi|194199778|gb|EDX13354.1| GD18765 [Drosophila simulans]
Unigene13979_All	1433	1e-105	GE24183 [Drosophila yakuba] >gi|194184085|gb|EDW97696.1| GE24183 [Drosophila yakuba]
Unigene13979_All	1433	1e-102	novel protein similar to vertebrate TBC1 domain family proteins [Danio rerio]
Unigene13979_All	1433	1e-102	PREDICTED: TBC1 domain family, member 10A-like [Danio rerio]
Unigene13982_All	441	1e-18	ACYPI005523 [Acyrthosiphon pisum]
Unigene13982_All	441	2e-16	PREDICTED: similar to Max protein [Apis mellifera]
Unigene13982_All	441	8e-16	PREDICTED: similar to upstream transcription factor 2/L-myc-2 [Nasonia vitripennis]
Unigene13982_All	441	8e-16	PREDICTED: similar to Myn protein - mouse [Strongylocentrotus purpuratus] >gi|115960922|ref|XP_001196275.1| PREDICTED: similar to Myn protein - mouse [Strongylocentrotus purpuratus]
Unigene13982_All	441	2e-15	AGAP003177-PA [Anopheles gambiae str. PEST] >gi|157017737|gb|EAA08332.5| AGAP003177-PA [Anopheles gambiae str. PEST]
Unigene13982_All	441	3e-15	PREDICTED: MYC associated factor X-like [Saccoglossus kowalevskii]
Unigene13982_All	441	3e-15	PREDICTED: similar to bhlhzip transcription factor max/bigmax [Tribolium castaneum]
Unigene13982_All	441	4e-15	bhlhzip transcription factor max/bigmax [Aedes aegypti] >gi|94469082|gb|ABF18390.1| upstream transcription factor 2/L-myc-2 [Aedes aegypti] >gi|108871371|gb|EAT35596.1| bhlhzip transcription factor max/bigmax [Aedes aegypti]
Unigene13982_All	441	5e-15	max [Salmo salar]
Unigene13982_All	441	2e-14	max [Salmo salar] >gi|223672879|gb|ACN12621.1| max [Salmo salar]
Unigene13982_All	441	2e-14	MYC associated factor X, isoform CRA_a [Homo sapiens]
Unigene13982_All	441	3e-14	PREDICTED: MAX protein isoform 1 [Oryctolagus cuniculus]
Unigene13982_All	441	3e-14	max [Osmerus mordax]
Unigene13982_All	441	3e-14	PREDICTED: similar to Max [Equus caballus]
Unigene13982_All	441	3e-14	PREDICTED: similar to max isoform 3 [Monodelphis domestica]
Unigene13982_All	441	3e-14	myc-associated factor X [Danio rerio]
Unigene13982_All	441	3e-14	myc-associated factor X [Danio rerio]
Unigene13982_All	441	3e-14	PREDICTED: similar to MAX protein isoform c isoform 3 [Canis familiaris] >gi|34099843|gb|AAQ57210.1| MAX protein [Homo sapiens] >gi|49457378|emb|CAG46988.1| MAX [Homo sapiens]
Unigene13982_All	441	3e-14	protein max isoform 2 [Mus musculus] >gi|219519378|gb|AAI45370.1| Max protein [Mus musculus]
Unigene13982_All	441	3e-14	MYC associated factor X [Xenopus (Silurana) tropicalis] >gi|51704165|gb|AAH81313.1| max protein [Xenopus (Silurana) tropicalis]
Unigene13983_All	749	3e-22	PREDICTED: rCG54054-like [Rattus norvegicus]
Unigene13983_All	749	3e-21	trichohyalin [Trichomonas vaginalis G3]
Unigene13983_All	749	2e-20	IQ calmodulin-binding motif domain-containing protein [Toxoplasma gondii ME49] >gi|211962264|gb|EEA97459.1| IQ calmodulin-binding motif domain-containing protein [Toxoplasma gondii ME49]
Unigene13983_All	749	5e-20	smooth muscle caldesmon [Trichomonas vaginalis G3]
Unigene13983_All	749	7e-19	GM16758 [Drosophila sechellia] >gi|194123384|gb|EDW45427.1| GM16758 [Drosophila sechellia]
Unigene13983_All	749	2e-18	GG24735 [Drosophila erecta] >gi|190660067|gb|EDV57259.1| GG24735 [Drosophila erecta]
Unigene13983_All	749	2e-18	AGAP002737-PA [Anopheles gambiae str. PEST] >gi|157017970|gb|EAA07771.4| AGAP002737-PA [Anopheles gambiae str. PEST]
Unigene13983_All	749	6e-18	PREDICTED: similar to CG18255-PA [Nasonia vitripennis]
Unigene13983_All	749	8e-18	PREDICTED: similar to Stretchin-Mlck CG18255-PA, isoform A [Apis mellifera]
Unigene13983_All	749	1e-17	erythrocyte binding protein [Trichomonas vaginalis G3]
Unigene13983_All	749	1e-17	trichohyalin [Trichomonas vaginalis G3]
Unigene13983_All	749	2e-17	GD23040 [Drosophila simulans] >gi|194189676|gb|EDX03252.1| GD23040 [Drosophila simulans]
Unigene13983_All	749	2e-17	Kelch motif family protein [Trichomonas vaginalis G3] >gi|121898431|gb|EAY03522.1| Kelch motif family protein [Trichomonas vaginalis G3]
Unigene13983_All	749	2e-17	trichohyalin [Trichomonas vaginalis G3]
Unigene13983_All	749	5e-17	trichohyalin [Entamoeba dispar SAW760]
Unigene13983_All	749	5e-17	villin [Entamoeba dispar SAW760]
Unigene13983_All	749	9e-17	Low complexity protein with large Glu repeat [Cryptosporidium parvum Iowa II] >gi|46226679|gb|EAK87658.1| Low complexity protein with large Glu repeat [Cryptosporidium parvum Iowa II]
Unigene13983_All	749	1e-16	GE16990 [Drosophila yakuba] >gi|194173558|gb|EDW87169.1| GE16990 [Drosophila yakuba]
Unigene13983_All	749	1e-16	GK19899 [Drosophila willistoni] >gi|194160170|gb|EDW75071.1| GK19899 [Drosophila willistoni]
Unigene13983_All	749	1e-16	CG2839 [Drosophila melanogaster] >gi|22945532|gb|AAF51469.2| CG2839 [Drosophila melanogaster]
Unigene13985_All	839	4e-91	PREDICTED: similar to CG4733-PA [Apis mellifera]
Unigene13985_All	839	2e-89	PREDICTED: similar to CG4733-PA [Acyrthosiphon pisum]
Unigene13985_All	839	8e-89	PREDICTED: similar to CG4733-PA [Nasonia vitripennis]
Unigene13985_All	839	6e-78	PREDICTED: similar to CG4733 CG4733-PA [Tribolium castaneum]
Unigene13985_All	839	2e-73	protein phosphatase 2 (formerly 2A), regulatory subunit B'', beta [Homo sapiens]
Unigene13985_All	839	2e-73	PREDICTED: similar to protein phosphatase 2 (formerly 2A), regulatory subunit B, beta, [Monodelphis domestica]
Unigene13985_All	839	2e-73	protein phosphatase 2 (formerly 2A), regulatory subunit B'', beta, isoform CRA_a [Homo sapiens]
Unigene13985_All	839	2e-73	protein phosphatase 2 (formerly 2A), regulatory subunit B'', beta, isoform CRA_b [Homo sapiens]
Unigene13985_All	839	2e-73	serine/threonine-protein phosphatase 2A regulatory subunit B'' subunit beta [Homo sapiens] >gi|158523346|sp|Q9Y5P8.2|P2R3B_HUMAN RecName: Full=Serine/threonine-protein phosphatase 2A regulatory subunit B'' subunit beta; AltName: Full=Protein phosphatase 2A 48 kDa regulatory subunit; AltName: Full=PP2A subunit B isoform PR48 >gi|32490541|tpg|DAA00385.1| TPA_exp: PP2A B'' subunit PR48 [Homo sapiens]
Unigene13985_All	839	2e-73	Protein phosphatase 2 (formerly 2A), regulatory subunit B'', beta [Homo sapiens]
Unigene13985_All	839	1e-72	PREDICTED: similar to PP2A B subunit PR48 [Gallus gallus]
Unigene13985_All	839	1e-72	GI22434 [Drosophila mojavensis] >gi|193917203|gb|EDW16070.1| GI22434 [Drosophila mojavensis]
Unigene13985_All	839	2e-72	PREDICTED: serine/threonine-protein phosphatase 2A regulatory subunit B'' subunit beta-like [Ailuropoda melanoleuca]
Unigene13985_All	839	2e-72	CG4733 [Drosophila melanogaster] >gi|272477057|gb|AAG22156.3| CG4733 [Drosophila melanogaster] >gi|299523293|gb|ADJ21823.1| MIP22305p [Drosophila melanogaster]
Unigene13985_All	839	2e-72	GD19321 [Drosophila simulans] >gi|194198714|gb|EDX12290.1| GD19321 [Drosophila simulans]
Unigene13985_All	839	2e-72	GK22364 [Drosophila willistoni] >gi|194168453|gb|EDW83354.1| GK22364 [Drosophila willistoni]
Unigene13985_All	839	2e-72	GM26872 [Drosophila sechellia] >gi|194127384|gb|EDW49427.1| GM26872 [Drosophila sechellia]
Unigene13985_All	839	2e-72	GG23581 [Drosophila erecta] >gi|190651191|gb|EDV48446.1| GG23581 [Drosophila erecta]
Unigene13985_All	839	2e-72	IP13829p [Drosophila melanogaster]
Unigene13985_All	839	3e-72	GE25633 [Drosophila yakuba] >gi|194182464|gb|EDW96075.1| GE25633 [Drosophila yakuba]
Unigene13986_All	590	5e-16	PREDICTED: similar to Cytosolic 5-nucleotidase III (cN-III) (Pyrimidine 5-nucleotidase 1) (P5N-1) (P5N-1) (PN-I) [Ciona intestinalis]
Unigene13986_All	590	1e-15	cytosolic 5'-nucleotidase III [Glossina morsitans morsitans]
Unigene13986_All	590	2e-15	GA17406 [Drosophila pseudoobscura pseudoobscura] >gi|195171165|ref|XP_002026381.1| GL19990 [Drosophila persimilis] >gi|54637177|gb|EAL26580.1| GA17406 [Drosophila pseudoobscura pseudoobscura] >gi|194111283|gb|EDW33326.1| GL19990 [Drosophila persimilis]
Unigene13986_All	590	3e-15	PREDICTED: similar to 5-nucleotidase, cytosolic III-like [Acyrthosiphon pisum]
Unigene13986_All	590	3e-15	GF11383 [Drosophila ananassae] >gi|190621967|gb|EDV37491.1| GF11383 [Drosophila ananassae]
Unigene13986_All	590	1e-14	GE14389 [Drosophila yakuba] >gi|194178891|gb|EDW92502.1| GE14389 [Drosophila yakuba]
Unigene13986_All	590	2e-14	GI21312 [Drosophila mojavensis] >gi|193911955|gb|EDW10822.1| GI21312 [Drosophila mojavensis]
Unigene13986_All	590	2e-14	CG3362 [Drosophila melanogaster] >gi|7291759|gb|AAF47180.1| CG3362 [Drosophila melanogaster] >gi|16769374|gb|AAL28906.1| LD28544p [Drosophila melanogaster] >gi|220946780|gb|ACL85933.1| CG3362-PA [synthetic construct] >gi|220956392|gb|ACL90739.1| CG3362-PA [synthetic construct]
Unigene13986_All	590	6e-14	GD11843 [Drosophila simulans] >gi|194194942|gb|EDX08518.1| GD11843 [Drosophila simulans]
Unigene13986_All	590	6e-14	GM18318 [Drosophila sechellia] >gi|194132378|gb|EDW53946.1| GM18318 [Drosophila sechellia]
Unigene13986_All	590	7e-14	GH20977 [Drosophila grimshawi] >gi|193901753|gb|EDW00620.1| GH20977 [Drosophila grimshawi]
Unigene13986_All	590	1e-13	Cytosolic 5-nucleotidase III-like protein A [Lepeophtheirus salmonis]
Unigene13986_All	590	1e-13	PREDICTED: similar to CG3362-PA [Nasonia vitripennis]
Unigene13986_All	590	1e-13	PREDICTED: similar to CG3362 CG3362-PA [Tribolium castaneum]
Unigene13986_All	590	2e-13	ACYPI006454 [Acyrthosiphon pisum]
Unigene13986_All	590	4e-13	GK15779 [Drosophila willistoni] >gi|194159772|gb|EDW74673.1| GK15779 [Drosophila willistoni]
Unigene13986_All	590	8e-13	AGAP010681-PA [Anopheles gambiae str. PEST] >gi|157018467|gb|EAA07027.4| AGAP010681-PA [Anopheles gambiae str. PEST]
Unigene13986_All	590	1e-12	GJ21581 [Drosophila virilis] >gi|194144234|gb|EDW60630.1| GJ21581 [Drosophila virilis]
Unigene13986_All	590	3e-12	5'-nucleotidase, cytosolic III-like [Xenopus (Silurana) tropicalis] >gi|189442173|gb|AAI67303.1| LOC100170453 protein [Xenopus (Silurana) tropicalis]
Unigene13986_All	590	4e-12	GG22952 [Drosophila erecta] >gi|190659757|gb|EDV56970.1| GG22952 [Drosophila erecta]
Unigene13988_All	536	2e-26	PREDICTED: similar to CG32486-PD [Apis mellifera]
Unigene13988_All	536	5e-24	PREDICTED: similar to CG32486 CG32486-PD [Acyrthosiphon pisum]
Unigene13988_All	536	3e-22	PREDICTED: similar to CG32486 CG32486-PD [Tribolium castaneum]
Unigene13988_All	536	1e-18	GJ13607 [Drosophila virilis] >gi|194154907|gb|EDW70091.1| GJ13607 [Drosophila virilis]
Unigene13988_All	536	1e-18	GI11411 [Drosophila mojavensis] >gi|193920776|gb|EDW19643.1| GI11411 [Drosophila mojavensis]
Unigene13988_All	536	2e-18	GA16940 [Drosophila pseudoobscura pseudoobscura] >gi|198151157|gb|EAL30231.2| GA16940 [Drosophila pseudoobscura pseudoobscura]
Unigene13988_All	536	2e-18	GD13360 [Drosophila simulans] >gi|194195435|gb|EDX09011.1| GD13360 [Drosophila simulans]
Unigene13988_All	536	2e-18	GE21673 [Drosophila yakuba] >gi|194180251|gb|EDW93862.1| GE21673 [Drosophila yakuba]
Unigene13988_All	536	2e-18	GM14088 [Drosophila sechellia] >gi|194128222|gb|EDW50265.1| GM14088 [Drosophila sechellia]
Unigene13988_All	536	2e-18	GH16998 [Drosophila grimshawi] >gi|193898801|gb|EDV97667.1| GH16998 [Drosophila grimshawi]
Unigene13988_All	536	2e-18	GG14485 [Drosophila erecta] >gi|190653124|gb|EDV50367.1| GG14485 [Drosophila erecta]
Unigene13988_All	536	2e-18	CG32486 [Drosophila melanogaster] >gi|75027766|sp|Q9VZV5.2|CYHR1_DROME RecName: Full=Cysteine and histidine-rich protein 1 homolog >gi|15292363|gb|AAK93450.1| LD47625p [Drosophila melanogaster] >gi|23095366|gb|AAF47711.2| CG32486 [Drosophila melanogaster] >gi|220946488|gb|ACL85787.1| CG32486-PD [synthetic construct]
Unigene13988_All	536	4e-18	GK12313 [Drosophila willistoni] >gi|194165073|gb|EDW79974.1| GK12313 [Drosophila willistoni]
Unigene13988_All	536	4e-18	GF10226 [Drosophila ananassae] >gi|190624321|gb|EDV39845.1| GF10226 [Drosophila ananassae]
Unigene13988_All	536	2e-16	PREDICTED: similar to cysteine/histidine-rich 1, partial [Taeniopygia guttata]
Unigene13988_All	536	6e-16	PREDICTED: cysteine and histidine-rich protein 1-like [Ailuropoda melanoleuca]
Unigene13988_All	536	6e-16	PREDICTED: similar to Cysteine and histidine-rich protein 1 [Equus caballus]
Unigene13988_All	536	6e-16	cysteine and histidine-rich protein 1 isoform 2 [Bos taurus] >gi|22122006|gb|AAM89496.1| cysteine and histidine-rich cytoplasmic protein [Bos taurus] >gi|296480728|gb|DAA22843.1| cysteine and histidine-rich protein 1 isoform 2 [Bos taurus]
Unigene13988_All	536	6e-16	PREDICTED: similar to cysteine and histidine rich 1 isoform 1 [Canis familiaris]
Unigene13988_All	536	6e-16	cysteine and histidine rich 1 [Bos taurus] >gi|37181084|gb|AAQ88433.1| cysteine and histidine-rich cytoplasmic protein [Ovis aries]
Unigene13989_All	1013	2e-89	PREDICTED: similar to crossveinless CG12410-PA [Apis mellifera]
Unigene13989_All	1013	7e-83	PREDICTED: similar to crossveinless CG12410-PA [Acyrthosiphon pisum]
Unigene13989_All	1013	2e-79	PREDICTED: similar to crossveinless CG12410-PA [Acyrthosiphon pisum]
Unigene13989_All	1013	3e-77	AGAP000304-PA [Anopheles gambiae str. PEST] >gi|157018854|gb|EAA06528.5| AGAP000304-PA [Anopheles gambiae str. PEST]
Unigene13989_All	1013	3e-71	GE16419 [Drosophila yakuba] >gi|194187505|gb|EDX01089.1| GE16419 [Drosophila yakuba]
Unigene13989_All	1013	3e-71	GM12427 [Drosophila sechellia] >gi|194131001|gb|EDW53044.1| GM12427 [Drosophila sechellia]
Unigene13989_All	1013	4e-71	crossveinless [Drosophila melanogaster] >gi|194888931|ref|XP_001976995.1| GG18776 [Drosophila erecta] >gi|195565247|ref|XP_002106214.1| GD16744 [Drosophila simulans] >gi|7290614|gb|AAF46063.1| crossveinless [Drosophila melanogaster] >gi|21483614|gb|AAM52782.1| SD27025p [Drosophila melanogaster] >gi|62485054|dbj|BAD95485.1| crossveinless [Drosophila melanogaster] >gi|190648644|gb|EDV45922.1| GG187…
Unigene13989_All	1013	1e-70	GA11617 [Drosophila pseudoobscura pseudoobscura] >gi|54642854|gb|EAL31598.1| GA11617 [Drosophila pseudoobscura pseudoobscura]
Unigene13989_All	1013	2e-70	GL18239 [Drosophila persimilis] >gi|194110666|gb|EDW32709.1| GL18239 [Drosophila persimilis]
Unigene13989_All	1013	1e-69	GK19972 [Drosophila willistoni] >gi|194160159|gb|EDW75060.1| GK19972 [Drosophila willistoni]
Unigene13989_All	1013	1e-69	GJ16717 [Drosophila virilis] >gi|194146570|gb|EDW62289.1| GJ16717 [Drosophila virilis]
Unigene13989_All	1013	1e-69	GH12675 [Drosophila grimshawi] >gi|193901232|gb|EDW00099.1| GH12675 [Drosophila grimshawi]
Unigene13989_All	1013	2e-68	GF21369 [Drosophila ananassae] >gi|190619013|gb|EDV34537.1| GF21369 [Drosophila ananassae]
Unigene13989_All	1013	4e-67	GI16252 [Drosophila mojavensis] >gi|193906964|gb|EDW05831.1| GI16252 [Drosophila mojavensis]
Unigene13989_All	1013	3e-53	GK20114 [Drosophila willistoni] >gi|194160428|gb|EDW75329.1| GK20114 [Drosophila willistoni]
Unigene13989_All	1013	3e-53	GK19749 [Drosophila willistoni] >gi|194160427|gb|EDW75328.1| GK19749 [Drosophila willistoni]
Unigene13989_All	1013	6e-53	GA13438 [Drosophila pseudoobscura pseudoobscura] >gi|198146955|gb|EAL32133.2| GA13438 [Drosophila pseudoobscura pseudoobscura]
Unigene13989_All	1013	6e-52	GF22285 [Drosophila ananassae] >gi|190619743|gb|EDV35267.1| GF22285 [Drosophila ananassae]
Unigene13989_All	1013	8e-52	GH11824 [Drosophila grimshawi] >gi|193901637|gb|EDW00504.1| GH11824 [Drosophila grimshawi]
Unigene13989_All	1013	3e-51	GJ18736 [Drosophila virilis] >gi|194150044|gb|EDW65735.1| GJ18736 [Drosophila virilis]
Unigene13990_All	578	5e-25	Frizzled 10A [Xenopus laevis] >gi|213625125|gb|AAI69883.1| Frizzled 10A [Xenopus laevis]
Unigene13990_All	578	5e-25	Fzd10b protein [Xenopus laevis]
Unigene13990_All	578	5e-25	frizzled homolog 10 [Xenopus (Silurana) tropicalis] >gi|49250341|gb|AAH74699.1| frizzled homolog 10 [Xenopus (Silurana) tropicalis] >gi|89268099|emb|CAJ83812.1| frizzled homolog 10 (Drosophila) [Xenopus tropicalis]
Unigene13990_All	578	5e-25	frizzled-10-A precursor [Xenopus laevis] >gi|17433043|sp|Q9DEB5.1|FZ10A_XENLA RecName: Full=Frizzled-10-A; Short=Fz-10A; Short=Xfz10-A; Flags: Precursor >gi|11691982|dbj|BAB19017.1| frizzled-10A [Xenopus laevis]
Unigene13990_All	578	5e-25	frizzled homolog 10 [Xenopus laevis] >gi|17433096|sp|Q9W742.1|FZ10B_XENLA RecName: Full=Frizzled-10-B; Short=Fz-10B; Short=Xfz10-B; AltName: Full=Frizzled-9; Short=Fz-9; Short=Xfz9; Flags: Precursor >gi|5524665|gb|AAD44332.1| frizzled 9 [Xenopus laevis] >gi|11691984|dbj|BAB19018.1| frizzled-10B [Xenopus laevis]
Unigene13990_All	578	7e-25	PREDICTED: similar to Frizzled-10 [Monodelphis domestica]
Unigene13990_All	578	9e-25	PREDICTED: frizzled-10-like [Callithrix jacchus]
Unigene13990_All	578	1e-24	PREDICTED: frizzled homolog 10 [Taeniopygia guttata]
Unigene13990_All	578	1e-24	PREDICTED: LOW QUALITY PROTEIN: frizzled-10-like, partial [Ailuropoda melanoleuca]
Unigene13990_All	578	1e-24	frizzled-10 precursor [Gallus gallus] >gi|17433077|sp|Q9PWH2.1|FZD10_CHICK RecName: Full=Frizzled-10; Short=Fz-10; Short=cFz-10; Flags: Precursor >gi|7340132|gb|AAF61100.1|AF224320_1 Frizzled-10 [Gallus gallus] >gi|5821259|dbj|BAA83742.1| Frizzled-10 [Gallus gallus]
Unigene13990_All	578	2e-24	PREDICTED: frizzled-10-like [Pongo abelii]
Unigene13990_All	578	2e-24	PREDICTED: frizzled 10-like [Danio rerio]
Unigene13990_All	578	2e-24	PREDICTED: frizzled 10 [Pan troglodytes]
Unigene13990_All	578	2e-24	PREDICTED: frizzled-10 [Macaca mulatta]
Unigene13990_All	578	2e-24	Frizzled homolog 10 (Drosophila) [Homo sapiens]
Unigene13990_All	578	2e-24	frizzled 10 isoform 1 [Danio rerio] >gi|6649948|gb|AAF21644.1|AF039411_1 frizzled homolog [Danio rerio]
Unigene13990_All	578	2e-24	frizzled 10 isoform 2 [Danio rerio] >gi|4585279|gb|AAD25358.1|AF117388_1 frizzled protein [Danio rerio] >gi|50369567|gb|AAH76546.1| Frizzled homolog 10 [Danio rerio] >gi|182889848|gb|AAI65721.1| Fzd10 protein [Danio rerio]
Unigene13990_All	578	2e-24	PREDICTED: frizzled homolog 10-like [Danio rerio] >gi|16508271|emb|CAD10102.1| frizzled homolog 10 [Danio rerio]
Unigene13990_All	578	2e-24	frizzled-10 precursor [Homo sapiens] >gi|17433091|sp|Q9ULW2.1|FZD10_HUMAN RecName: Full=Frizzled-10; Short=Fz-10; Short=hFz10; AltName: Full=FzE7; AltName: CD_antigen=CD350; Flags: Precursor >gi|5834488|dbj|BAA84093.1| Frizzled-10 [Homo sapiens] >gi|50959763|gb|AAH74997.1| Frizzled homolog 10 (Drosophila) [Homo sapiens] >gi|50960841|gb|AAH74998.1| Frizzled 10 [Homo sapiens] >gi|119618913|gb|EAW98…
Unigene13990_All	578	3e-24	PREDICTED: similar to LOC515323 protein [Equus caballus]
Unigene13991_All	585	3e-06	PREDICTED: tetratricopeptide repeat domain 3 [Oryctolagus cuniculus]
Unigene13993_All	577	2e-38	PREDICTED: similar to Ubiquitin-protein ligase E3C, partial [Apis mellifera]
Unigene13993_All	577	2e-38	PREDICTED: similar to CG3356-PA [Apis mellifera]
Unigene13993_All	577	3e-38	PREDICTED: similar to ubiquitin protein ligase [Nasonia vitripennis]
Unigene13993_All	577	5e-27	ubiquitin protein ligase [Culex quinquefasciatus] >gi|167874287|gb|EDS37670.1| ubiquitin protein ligase [Culex quinquefasciatus]
Unigene13993_All	577	1e-26	ubiquitin protein ligase [Aedes aegypti] >gi|108872136|gb|EAT36361.1| ubiquitin protein ligase [Aedes aegypti]
Unigene13993_All	577	1e-26	ubiquitin protein ligase [Aedes aegypti] >gi|108870058|gb|EAT34283.1| ubiquitin protein ligase [Aedes aegypti]
Unigene13993_All	577	2e-24	PREDICTED: ubiquitin-protein ligase E3C-like [Macaca mulatta]
Unigene13993_All	577	2e-24	PREDICTED: ubiquitin protein ligase E3C [Pan troglodytes]
Unigene13993_All	577	2e-24	UBE3C protein [Homo sapiens] >gi|119624972|gb|EAX04567.1| ubiquitin protein ligase E3C, isoform CRA_a [Homo sapiens]
Unigene13993_All	577	2e-24	KIAA0010 [Homo sapiens]
Unigene13993_All	577	2e-24	ubiquitin-protein ligase E3C [Homo sapiens] >gi|67462009|sp|Q15386.3|UBE3C_HUMAN RecName: Full=Ubiquitin-protein ligase E3C >gi|51094672|gb|EAL23922.1| ubiquitin protein ligase E3C [Homo sapiens] >gi|119624973|gb|EAX04568.1| ubiquitin protein ligase E3C, isoform CRA_b [Homo sapiens]
Unigene13993_All	577	3e-24	PREDICTED: ubiquitin-protein ligase E3C [Callithrix jacchus]
Unigene13993_All	577	3e-24	AGAP011474-PA [Anopheles gambiae str. PEST] >gi|157014668|gb|EAA13012.4| AGAP011474-PA [Anopheles gambiae str. PEST]
Unigene13993_All	577	7e-24	PREDICTED: ubiquitin protein ligase E3C [Oryctolagus cuniculus]
Unigene13993_All	577	7e-24	PREDICTED: ubiquitin protein ligase E3C [Rattus norvegicus] >gi|109472884|ref|XP_001055148.1| PREDICTED: mKIAA0010 protein-like [Rattus norvegicus]
Unigene13993_All	577	9e-24	PREDICTED: ubiquitin protein ligase E3C [Taeniopygia guttata]
Unigene13993_All	577	9e-24	ubiquitin protein ligase E3C, isoform CRA_b [Mus musculus]
Unigene13993_All	577	9e-24	ubiquitin protein ligase E3C [Xenopus (Silurana) tropicalis] >gi|112419085|gb|AAI21963.1| ubiquitin protein ligase E3C [Xenopus (Silurana) tropicalis]
Unigene13993_All	577	9e-24	novel protein (zgc:63649) [Danio rerio]
Unigene13993_All	577	9e-24	ubiquitin-protein ligase E3C [Danio rerio] >gi|32766364|gb|AAH55184.1| Ubiquitin protein ligase E3C [Danio rerio]
Unigene13994_All	553	3e-19	PREDICTED: similar to trypsin-like serine protease [Acyrthosiphon pisum]
Unigene13994_All	553	6e-19	PREDICTED: similar to CLIP-domain serine protease subfamily C (AGAP000571-PA) [Acyrthosiphon pisum]
Unigene13994_All	553	5e-18	PREDICTED: similar to serine protease [Acyrthosiphon pisum]
Unigene13994_All	553	3e-17	PREDICTED: similar to CG11843-PA [Apis mellifera]
Unigene13994_All	553	3e-16	ACYPI008538 [Acyrthosiphon pisum]
Unigene13994_All	553	5e-16	serine protease P61 [Tribolium castaneum]
Unigene13994_All	553	9e-16	PREDICTED: similar to serine protease [Acyrthosiphon pisum]
Unigene13994_All	553	1e-15	PREDICTED: similar to snake CG7996-PA [Apis mellifera]
Unigene13994_All	553	1e-15	PREDICTED: similar to serine protease [Acyrthosiphon pisum]
Unigene13994_All	553	1e-15	CLIP-domain serine protease subfamily C (AGAP008835-PA) [Anopheles gambiae str. PEST] >gi|116117451|gb|EAL38946.2| CLIP-domain serine protease subfamily C (AGAP008835-PA) [Anopheles gambiae str. PEST]
Unigene13994_All	553	2e-15	serine protease 142 [Nasonia vitripennis]
Unigene13994_All	553	2e-15	serine protease [Culex quinquefasciatus] >gi|167881596|gb|EDS44979.1| serine protease [Culex quinquefasciatus]
Unigene13994_All	553	3e-15	serine protease [Culex quinquefasciatus] >gi|167870863|gb|EDS34246.1| serine protease [Culex quinquefasciatus]
Unigene13994_All	553	3e-15	serine protease [Aedes aegypti] >gi|108871659|gb|EAT35884.1| serine protease [Aedes aegypti]
Unigene13994_All	553	3e-15	serine protease [Aedes aegypti] >gi|108871658|gb|EAT35883.1| serine protease [Aedes aegypti]
Unigene13994_All	553	7e-15	serine protease P43 [Tribolium castaneum]
Unigene13994_All	553	7e-15	PREDICTED: similar to trypsin-like serine protease, partial [Acyrthosiphon pisum]
Unigene13994_All	553	7e-15	ACYPI000297 [Acyrthosiphon pisum]
Unigene13994_All	553	7e-15	PREDICTED: similar to snake CG7996-PA [Apis mellifera]
Unigene13994_All	553	1e-14	PREDICTED: similar to serine protease [Acyrthosiphon pisum]
Unigene13995_All	601	2e-29	PREDICTED: similar to atrophin-1 like protein [Apis mellifera]
Unigene13995_All	601	2e-27	PREDICTED: similar to arginine glutamic acid dipeptide (RE) repeats [Acyrthosiphon pisum]
Unigene13995_All	601	3e-27	PREDICTED: similar to transcriptional corepressor Atro [Nasonia vitripennis]
Unigene13995_All	601	3e-22	PREDICTED: similar to atrophin-1 like protein [Tribolium castaneum]
Unigene13995_All	601	6e-14	GG18108 [Drosophila erecta] >gi|190649333|gb|EDV46611.1| GG18108 [Drosophila erecta]
Unigene13995_All	601	3e-13	GF17078 [Drosophila ananassae] >gi|190626780|gb|EDV42304.1| GF17078 [Drosophila ananassae]
Unigene13995_All	601	1e-12	GI11949 [Drosophila mojavensis] >gi|193919806|gb|EDW18673.1| GI11949 [Drosophila mojavensis]
Unigene13995_All	601	1e-11	GE21449 [Drosophila yakuba] >gi|194179805|gb|EDW93416.1| GE21449 [Drosophila yakuba]
Unigene13995_All	601	1e-11	GK20557 [Drosophila willistoni] >gi|194164682|gb|EDW79583.1| GK20557 [Drosophila willistoni]
Unigene13995_All	601	2e-11	GL24546 [Drosophila persimilis] >gi|194103133|gb|EDW25176.1| GL24546 [Drosophila persimilis]
Unigene13995_All	601	2e-11	PREDICTED: similar to LD22609p [Nasonia vitripennis]
Unigene13995_All	601	3e-11	GE14936 [Drosophila yakuba] >gi|194186722|gb|EDX00334.1| GE14936 [Drosophila yakuba]
Unigene13995_All	601	5e-11	PREDICTED: bromodomain-containing protein 4 [Pan troglodytes]
Unigene13995_All	601	5e-11	CG15005 [Drosophila melanogaster] >gi|23092983|gb|AAF47859.2| CG15005 [Drosophila melanogaster] >gi|25012487|gb|AAN71348.1| RE27538p [Drosophila melanogaster]
Unigene13995_All	601	5e-11	CG15021 [Drosophila melanogaster] >gi|17945382|gb|AAL48746.1| RE17165p [Drosophila melanogaster] >gi|23093008|gb|AAF47902.2| CG15021 [Drosophila melanogaster] >gi|220957338|gb|ACL91212.1| CG15021-PA [synthetic construct] >gi|220960148|gb|ACL92610.1| CG15021-PA [synthetic construct]
Unigene13995_All	601	5e-11	GF23569 [Drosophila ananassae] >gi|190617742|gb|EDV33266.1| GF23569 [Drosophila ananassae]
Unigene13995_All	601	6e-11	GM14002 [Drosophila sechellia] >gi|194128397|gb|EDW50440.1| GM14002 [Drosophila sechellia]
Unigene13995_All	601	8e-11	GE18257 [Drosophila yakuba] >gi|194185818|gb|EDW99429.1| GE18257 [Drosophila yakuba]
Unigene13995_All	601	8e-11	GL21920 [Drosophila persimilis] >gi|194111788|gb|EDW33831.1| GL21920 [Drosophila persimilis]
Unigene13995_All	601	8e-11	GG21917 [Drosophila erecta] >gi|190651515|gb|EDV48770.1| GG21917 [Drosophila erecta]
Unigene13996_All	677	6e-67	PREDICTED: similar to aspartyl/asparaginyl beta-hydroxylase [Tribolium castaneum]
Unigene13996_All	677	5e-66	aspartyl/asparaginyl beta-hydroxylase [Culex quinquefasciatus] >gi|167868824|gb|EDS32207.1| aspartyl/asparaginyl beta-hydroxylase [Culex quinquefasciatus]
Unigene13996_All	677	1e-64	AGAP005832-PB [Anopheles gambiae str. PEST] >gi|157015759|gb|EAA11939.4| AGAP005832-PB [Anopheles gambiae str. PEST]
Unigene13996_All	677	1e-63	aspartyl/asparaginyl beta-hydroxylase [Aedes aegypti] >gi|108879126|gb|EAT43351.1| aspartyl/asparaginyl beta-hydroxylase [Aedes aegypti]
Unigene13996_All	677	4e-61	GL20566 [Drosophila persimilis] >gi|194111288|gb|EDW33331.1| GL20566 [Drosophila persimilis]
Unigene13996_All	677	6e-61	GA21066 [Drosophila pseudoobscura pseudoobscura] >gi|198137334|gb|EAL26583.2| GA21066 [Drosophila pseudoobscura pseudoobscura]
Unigene13996_All	677	5e-60	GF11291 [Drosophila ananassae] >gi|190622153|gb|EDV37677.1| GF11291 [Drosophila ananassae]
Unigene13996_All	677	1e-59	GG20567 [Drosophila erecta] >gi|190658608|gb|EDV55821.1| GG20567 [Drosophila erecta]
Unigene13996_All	677	3e-59	GE11752 [Drosophila yakuba] >gi|194178379|gb|EDW91990.1| GE11752 [Drosophila yakuba]
Unigene13996_All	677	8e-59	aspartyl beta-hydroxylase, isoform A [Drosophila melanogaster] >gi|11878106|gb|AAG40806.1|AF289493_1 aspartyl beta-hydroxylase variant 1 [Drosophila melanogaster] >gi|21645338|gb|AAM70947.1| aspartyl beta-hydroxylase, isoform A [Drosophila melanogaster]
Unigene13996_All	677	1e-58	PREDICTED: similar to aspartyl (asparaginyl) beta hydroxylase, partial [Strongylocentrotus purpuratus]
Unigene13996_All	677	1e-58	PREDICTED: similar to aspartyl (asparaginyl) beta hydroxylase, partial [Strongylocentrotus purpuratus]
Unigene13996_All	677	2e-58	GM21659 [Drosophila sechellia] >gi|194126033|gb|EDW48076.1| GM21659 [Drosophila sechellia]
Unigene13996_All	677	2e-58	GD11159 [Drosophila simulans] >gi|194193721|gb|EDX07297.1| GD11159 [Drosophila simulans]
Unigene13996_All	677	2e-58	GI19152 [Drosophila mojavensis] >gi|193910370|gb|EDW09237.1| GI19152 [Drosophila mojavensis]
Unigene13996_All	677	2e-57	PREDICTED: LOW QUALITY PROTEIN: aspartyl/asparaginyl beta-hydroxylase-like [Callithrix jacchus]
Unigene13996_All	677	3e-57	GK21857 [Drosophila willistoni] >gi|194159436|gb|EDW74337.1| GK21857 [Drosophila willistoni]
Unigene13996_All	677	3e-57	GJ22287 [Drosophila virilis] >gi|194145469|gb|EDW61865.1| GJ22287 [Drosophila virilis]
Unigene13996_All	677	3e-57	PREDICTED: similar to aspartyl(asparaginyl)beta-hydroxylase; HAAH [Gallus gallus]
Unigene13996_All	677	4e-57	PREDICTED: similar to aspartyl (asparaginyl) beta hydroxylase [Equus caballus]
Unigene13997_All	611	5e-43	PREDICTED: similar to AGAP002403-PA [Acyrthosiphon pisum]
Unigene13997_All	611	1e-28	GI10291 [Drosophila mojavensis] >gi|193917151|gb|EDW16018.1| GI10291 [Drosophila mojavensis]
Unigene13997_All	611	2e-28	GH17327 [Drosophila grimshawi] >gi|193892351|gb|EDV91217.1| GH17327 [Drosophila grimshawi]
Unigene13997_All	611	3e-28	PREDICTED: similar to CG10898-PA [Apis mellifera]
Unigene13997_All	611	7e-28	GM23952 [Drosophila sechellia] >gi|194120554|gb|EDW42597.1| GM23952 [Drosophila sechellia]
Unigene13997_All	611	7e-28	Nudt18 protein [Culex quinquefasciatus] >gi|167866667|gb|EDS30050.1| Nudt18 protein [Culex quinquefasciatus]
Unigene13997_All	611	7e-28	CG10898 [Drosophila melanogaster] >gi|195571729|ref|XP_002103855.1| GD18763 [Drosophila simulans] >gi|7299465|gb|AAF54653.1| CG10898 [Drosophila melanogaster] >gi|17944256|gb|AAL48022.1| LD28119p [Drosophila melanogaster] >gi|194199782|gb|EDX13358.1| GD18763 [Drosophila simulans] >gi|220945900|gb|ACL85493.1| CG10898-PA [synthetic construct] >gi|220955656|gb|ACL90371.1| CG10898-PA [synthetic const…
Unigene13997_All	611	2e-27	GJ11098 [Drosophila virilis] >gi|194143443|gb|EDW59846.1| GJ11098 [Drosophila virilis]
Unigene13997_All	611	5e-27	GG18222 [Drosophila erecta] >gi|190652255|gb|EDV49510.1| GG18222 [Drosophila erecta]
Unigene13997_All	611	6e-27	AGAP002403-PA [Anopheles gambiae str. PEST] >gi|55242375|gb|EAA08112.2| AGAP002403-PA [Anopheles gambiae str. PEST]
Unigene13997_All	611	1e-26	GF18377 [Drosophila ananassae] >gi|190627685|gb|EDV43209.1| GF18377 [Drosophila ananassae]
Unigene13997_All	611	2e-26	GE24179 [Drosophila yakuba] >gi|194184092|gb|EDW97703.1| GE24179 [Drosophila yakuba]
Unigene13997_All	611	3e-26	GA10624 [Drosophila pseudoobscura pseudoobscura] >gi|54639413|gb|EAL28815.1| GA10624 [Drosophila pseudoobscura pseudoobscura]
Unigene13997_All	611	1e-25	GL12379 [Drosophila persimilis] >gi|194115975|gb|EDW38018.1| GL12379 [Drosophila persimilis]
Unigene13997_All	611	2e-25	GK11300 [Drosophila willistoni] >gi|194166026|gb|EDW80927.1| GK11300 [Drosophila willistoni]
Unigene13998_All	1795	0	PREDICTED: similar to mitogen-activated protein kinase kinase kinase 9 [Apis mellifera]
Unigene13998_All	1795	0	PREDICTED: similar to mixed lineage kinase [Acyrthosiphon pisum]
Unigene13998_All	1795	0	PREDICTED: similar to mixed lineage kinase [Tribolium castaneum]
Unigene13998_All	1795	1e-177	PREDICTED: mitogen-activated protein kinase kinase kinase 10-like [Saccoglossus kowalevskii]
Unigene13998_All	1795	1e-175	mixed lineage kinase [Aedes aegypti] >gi|108870569|gb|EAT34794.1| mixed lineage kinase [Aedes aegypti]
Unigene13998_All	1795	1e-174	mixed lineage kinase [Culex quinquefasciatus] >gi|167873523|gb|EDS36906.1| mixed lineage kinase [Culex quinquefasciatus]
Unigene13998_All	1795	1e-174	PREDICTED: mitogen-activated protein kinase kinase kinase 9-like [Xenopus (Silurana) tropicalis]
Unigene13998_All	1795	1e-173	PREDICTED: similar to mixed lineage kinase MLK1 [Monodelphis domestica]
Unigene13998_All	1795	1e-173	PREDICTED: mitogen-activated protein kinase kinase kinase 9 [Rattus norvegicus]
Unigene13998_All	1795	1e-173	PREDICTED: mitogen-activated protein kinase kinase kinase 9 [Rattus norvegicus]
Unigene13998_All	1795	1e-172	mitogen-activated protein kinase kinase kinase 9 isoform 1 [Mus musculus]
Unigene13998_All	1795	1e-172	mitogen-activated protein kinase kinase kinase 9 isoform 2 [Mus musculus] >gi|117616520|gb|ABK42278.1| MLK1 [synthetic construct]
Unigene13998_All	1795	1e-172	PREDICTED: mitogen-activated protein kinase kinase kinase 9 isoform 2 [Macaca mulatta]
Unigene13998_All	1795	1e-172	PREDICTED: mitogen-activated protein kinase kinase kinase 9 isoform 1 [Macaca mulatta]
Unigene13998_All	1795	1e-172	RecName: Full=Mitogen-activated protein kinase kinase kinase 9
Unigene13998_All	1795	1e-172	PREDICTED: mitogen-activated protein kinase kinase kinase 9 [Callithrix jacchus]
Unigene13998_All	1795	1e-171	PREDICTED: MAP3K9 protein-like [Bos taurus] >gi|296483024|gb|DAA25139.1| MAP3K9 protein-like [Bos taurus]
Unigene13998_All	1795	1e-171	PREDICTED: LOW QUALITY PROTEIN: mitogen-activated protein kinase kinase kinase 9-like [Pongo abelii]
Unigene13998_All	1795	1e-171	RecName: Full=Mitogen-activated protein kinase kinase kinase 9; AltName: Full=Mixed lineage kinase 1 >gi|126632195|gb|AAI33707.1| MAP3K9 protein [Homo sapiens]
Unigene13998_All	1795	1e-171	MAP3K9 protein [Homo sapiens]
Unigene13999_All	769	3e-99	PREDICTED: similar to zinc finger protein 585A, partial [Apis mellifera]
Unigene13999_All	769	5e-87	PREDICTED: similar to zinc finger protein 99 [Tribolium castaneum]
Unigene13999_All	769	6e-61	PREDICTED: similar to Zinc finger protein 271 (Zinc finger protein 7) (HZF7) (Zinc finger protein ZNFphex133) (Epstein-Barr virus-induced zinc finger protein) (ZNF-EB) (CT-ZFP48) (Zinc finger protein dp) (ZNF-dp) [Acyrthosiphon pisum]
Unigene13999_All	769	1e-60	PREDICTED: zinc finger protein 91 [Bos taurus]
Unigene13999_All	769	1e-60	PREDICTED: zinc finger protein 107, partial [Bos taurus] >gi|296477336|gb|DAA19451.1| zinc finger protein 107 [Bos taurus]
Unigene13999_All	769	2e-60	zinc finger protein 28 [Homo sapiens] >gi|223461294|gb|AAI40721.1| Zinc finger protein 28 [Homo sapiens]
Unigene13999_All	769	2e-60	PREDICTED: zinc finger protein 570-like [Bos taurus]
Unigene13999_All	769	3e-60	PREDICTED: similar to zinc finger protein 2 homolog [Acyrthosiphon pisum]
Unigene13999_All	769	3e-60	PREDICTED: similar to Zinc finger protein 271 (Zinc finger protein 7) (HZF7) (Zinc finger protein ZNFphex133) (Epstein-Barr virus-induced zinc finger protein) (ZNF-EB) (CT-ZFP48) (Zinc finger protein dp) (ZNF-dp) [Acyrthosiphon pisum]
Unigene13999_All	769	3e-60	RecName: Full=Zinc finger protein 28; AltName: Full=Zinc finger protein KOX24 >gi|119592503|gb|EAW72097.1| zinc finger protein 28 (KOX 24), isoform CRA_a [Homo sapiens]
Unigene13999_All	769	3e-60	zinc finger protein 28 (KOX 24), isoform CRA_b [Homo sapiens]
Unigene13999_All	769	5e-60	PREDICTED: zinc finger protein 21 [Oryctolagus cuniculus]
Unigene13999_All	769	5e-60	PREDICTED: similar to Zinc finger protein 271 (Zinc finger protein 7) (HZF7) (Zinc finger protein ZNFphex133) (Epstein-Barr virus-induced zinc finger protein) (ZNF-EB) (CT-ZFP48) (Zinc finger protein dp) (ZNF-dp) [Acyrthosiphon pisum]
Unigene13999_All	769	7e-60	PREDICTED: LOW QUALITY PROTEIN: zinc finger protein 227-like [Ailuropoda melanoleuca]
Unigene13999_All	769	7e-60	PREDICTED: zinc finger protein 182-like [Macaca mulatta]
Unigene13999_All	769	7e-60	PREDICTED: LOW QUALITY PROTEIN: zinc finger protein 182-like [Callithrix jacchus]
Unigene13999_All	769	7e-60	PREDICTED: similar to Zinc finger protein 271 (Zinc finger protein 7) (HZF7) (Zinc finger protein ZNFphex133) (Epstein-Barr virus-induced zinc finger protein) (ZNF-EB) (CT-ZFP48) (Zinc finger protein dp) (ZNF-dp) [Acyrthosiphon pisum]
Unigene13999_All	769	7e-60	zinc finger protein 21 (KOX 14), isoform CRA_c [Homo sapiens]
Unigene13999_All	769	7e-60	PREDICTED: zinc finger protein 21 [Pan troglodytes]
Unigene13999_All	769	7e-60	PREDICTED: zinc finger protein 182-like isoform 1 [Macaca mulatta] >gi|109130568|ref|XP_001095906.1| PREDICTED: zinc finger protein 182-like isoform 3 [Macaca mulatta]
Unigene14001_All	593	3e-54	PREDICTED: similar to ebna2 binding protein P100 [Tribolium castaneum]
Unigene14001_All	593	6e-50	ebna2 binding protein P100 [Aedes aegypti] >gi|108884504|gb|EAT48729.1| ebna2 binding protein P100 [Aedes aegypti]
Unigene14001_All	593	3e-49	GJ16044 [Drosophila virilis] >gi|194140650|gb|EDW57124.1| GJ16044 [Drosophila virilis]
Unigene14001_All	593	5e-49	GI12526 [Drosophila mojavensis] >gi|193918785|gb|EDW17652.1| GI12526 [Drosophila mojavensis]
Unigene14001_All	593	9e-49	GK17654 [Drosophila willistoni] >gi|194158747|gb|EDW73648.1| GK17654 [Drosophila willistoni]
Unigene14001_All	593	2e-48	GF24753 [Drosophila ananassae] >gi|190623397|gb|EDV38921.1| GF24753 [Drosophila ananassae]
Unigene14001_All	593	5e-48	GH15748 [Drosophila grimshawi] >gi|193896649|gb|EDV95515.1| GH15748 [Drosophila grimshawi]
Unigene14001_All	593	2e-47	GK23451 [Drosophila willistoni] >gi|194171220|gb|EDW86121.1| GK23451 [Drosophila willistoni]
Unigene14001_All	593	3e-47	ebna2 binding protein P100 [Culex quinquefasciatus] >gi|167865143|gb|EDS28526.1| ebna2 binding protein P100 [Culex quinquefasciatus]
Unigene14001_All	593	4e-47	GD25717 [Drosophila simulans] >gi|194193432|gb|EDX07008.1| GD25717 [Drosophila simulans]
Unigene14001_All	593	4e-47	GE21033 [Drosophila yakuba] >gi|194179085|gb|EDW92696.1| GE21033 [Drosophila yakuba]
Unigene14001_All	593	4e-47	GM14288 [Drosophila sechellia] >gi|194127860|gb|EDW49903.1| GM14288 [Drosophila sechellia]
Unigene14001_All	593	4e-47	GL16097 [Drosophila persimilis] >gi|194110952|gb|EDW32995.1| GL16097 [Drosophila persimilis]
Unigene14001_All	593	4e-47	GG14673 [Drosophila erecta] >gi|190652781|gb|EDV50024.1| GG14673 [Drosophila erecta]
Unigene14001_All	593	4e-47	Tudor-SN [Drosophila melanogaster] >gi|7291949|gb|AAF47366.1| Tudor-SN [Drosophila melanogaster] >gi|27819982|gb|AAO25027.1| LD20211p [Drosophila melanogaster] >gi|220950340|gb|ACL87713.1| Tudor-SN-PA [synthetic construct]
Unigene14001_All	593	4e-47	GA20026 [Drosophila pseudoobscura pseudoobscura] >gi|54641240|gb|EAL29990.1| GA20026 [Drosophila pseudoobscura pseudoobscura]
Unigene14001_All	593	1e-46	PREDICTED: similar to Tudor-SN CG7008-PA [Apis mellifera]
Unigene14001_All	593	4e-45	tudor staphylococcus/micrococcal nuclease [Nasonia vitripennis]
Unigene14001_All	593	2e-42	PREDICTED: similar to 4SNc-Tudor domain protein [Strongylocentrotus purpuratus] >gi|115964201|ref|XP_001183391.1| PREDICTED: similar to 4SNc-Tudor domain protein [Strongylocentrotus purpuratus]
Unigene14001_All	593	2e-42	PREDICTED: similar to Staphylococcal nuclease domain containing 1 [Strongylocentrotus purpuratus] >gi|115964203|ref|XP_001183433.1| PREDICTED: similar to Staphylococcal nuclease domain containing 1 [Strongylocentrotus purpuratus]
Unigene14004_All	712	9e-19	AGAP008244-PA [Anopheles gambiae str. PEST] >gi|157014929|gb|EAL39610.3| AGAP008244-PA [Anopheles gambiae str. PEST]
Unigene14004_All	712	2e-18	GK12566 [Drosophila willistoni] >gi|194163794|gb|EDW78695.1| GK12566 [Drosophila willistoni]
Unigene14004_All	712	3e-17	GK15899 [Drosophila willistoni] >gi|194159944|gb|EDW74845.1| GK15899 [Drosophila willistoni]
Unigene14004_All	712	3e-17	peritrophic matrix protein 3 [Tribolium castaneum] >gi|268309038|gb|ACY95485.1| peritrophic matrix protein 3 [Tribolium castaneum]
Unigene14004_All	712	1e-16	Hypothetical protein CBG23547 [Caenorhabditis briggsae] >gi|187020927|emb|CAP39508.1| Hypothetical protein CBG23547 [Caenorhabditis briggsae]
Unigene14004_All	712	2e-16	GK23783 [Drosophila willistoni] >gi|194160600|gb|EDW75501.1| GK23783 [Drosophila willistoni]
Unigene14004_All	712	7e-16	GM10150 [Drosophila sechellia] >gi|194123134|gb|EDW45177.1| GM10150 [Drosophila sechellia]
Unigene14004_All	712	9e-16	mucin 68E [Drosophila melanogaster] >gi|45445925|gb|AAS65018.1| mucin 68E [Drosophila melanogaster]
Unigene14004_All	712	9e-16	CG6296 [Drosophila melanogaster] >gi|7301526|gb|AAF56648.1| CG6296 [Drosophila melanogaster] >gi|21428632|gb|AAM49976.1| LP07116p [Drosophila melanogaster] >gi|220946512|gb|ACL85799.1| CG6296-PA [synthetic construct] >gi|220956130|gb|ACL90608.1| CG6296-PA [synthetic construct]
Unigene14004_All	712	1e-15	GE20156 [Drosophila yakuba] >gi|194180624|gb|EDW94235.1| GE20156 [Drosophila yakuba]
Unigene14004_All	712	1e-15	GF24494 [Drosophila ananassae] >gi|190623906|gb|EDV39430.1| GF24494 [Drosophila ananassae]
Unigene14004_All	712	3e-15	GA22287 [Drosophila pseudoobscura pseudoobscura] >gi|198149310|gb|EDY73203.1| GA22287 [Drosophila pseudoobscura pseudoobscura]
Unigene14004_All	712	4e-15	Hoglet [Monosiga ovata]
Unigene14004_All	712	6e-15	PREDICTED: nuclear factor I/X (CCAAT-binding transcription factor)-like, partial [Danio rerio]
Unigene14004_All	712	7e-15	flocculin [Trichomonas vaginalis G3]
Unigene14004_All	712	7e-15	mucin 68Ca [Drosophila melanogaster] >gi|45445940|gb|AAS65029.1| mucin 68Ca [Drosophila melanogaster]
Unigene14004_All	712	1e-14	C. briggsae CBR-DPY-6 protein [Caenorhabditis briggsae] >gi|187021597|emb|CAP39286.1| C. briggsae CBR-DPY-6 protein [Caenorhabditis briggsae]
Unigene14004_All	712	1e-14	PREDICTED: mucin-5AC-like [Xenopus (Silurana) tropicalis]
Unigene14004_All	712	1e-14	GD12757 [Drosophila simulans] >gi|194196588|gb|EDX10164.1| GD12757 [Drosophila simulans]
Unigene14004_All	712	1e-14	GM24687 [Drosophila sechellia] >gi|194119155|gb|EDW41198.1| GM24687 [Drosophila sechellia]
Unigene14005_All	584	7e-27	PREDICTED: similar to CG31728-PA [Apis mellifera]
Unigene14005_All	584	2e-26	oviductin [Aedes aegypti] >gi|108879355|gb|EAT43580.1| oviductin [Aedes aegypti]
Unigene14005_All	584	4e-25	PREDICTED: similar to trypsin-like serine protease [Acyrthosiphon pisum]
Unigene14005_All	584	4e-25	oviductin [Culex quinquefasciatus] >gi|167864645|gb|EDS28028.1| oviductin [Culex quinquefasciatus]
Unigene14005_All	584	2e-24	CLIP-domain serine protease subfamily D (AGAP008183-PA) [Anopheles gambiae str. PEST] >gi|116123116|gb|EAA12489.3| CLIP-domain serine protease subfamily D (AGAP008183-PA) [Anopheles gambiae str. PEST]
Unigene14005_All	584	1e-23	PREDICTED: similar to trypsin-like serine protease [Tribolium castaneum]
Unigene14005_All	584	1e-23	serine protease P53 [Tribolium castaneum]
Unigene14005_All	584	8e-23	serine protease 70 [Nasonia vitripennis]
Unigene14005_All	584	8e-13	Trypsin-1 precursor [Caligus clemensi]
Unigene14006_All	1378	3e-89	PREDICTED: similar to Zinc finger homeobox protein 3 (Zinc finger homeodomain protein 3) (ZFH-3) (Alpha-fetoprotein enhancer-binding protein) (AT motif-binding factor) (AT-binding transcription factor 1) [Tribolium castaneum]
Unigene14006_All	1378	1e-82	PREDICTED: similar to Zinc finger homeobox protein 3 (Zinc finger homeodomain protein 3) (ZFH-3) (Alpha-fetoprotein enhancer-binding protein) (AT motif-binding factor) (AT-binding transcription factor 1) [Acyrthosiphon pisum]
Unigene14006_All	1378	3e-73	Zn finger homeodomain 2 [Tribolium castaneum]
Unigene14006_All	1378	5e-72	PREDICTED: similar to Alpha-fetoprotein enhancer-binding protein (AT motif-binding factor) (AT-binding transcription factor 1) [Apis mellifera]
Unigene14006_All	1378	9e-32	AT-binding transcription factor1 [Branchiostoma floridae] >gi|229279434|gb|EEN50212.1| AT-binding transcription factor1 [Branchiostoma floridae]
Unigene14006_All	1378	7e-29	PREDICTED: similar to AT motif binding factor 1 [Strongylocentrotus purpuratus] >gi|115949932|ref|XP_001192612.1| PREDICTED: similar to AT motif binding factor 1 [Strongylocentrotus purpuratus]
Unigene14006_All	1378	1e-27	Homeobox domain containing protein [Brugia malayi] >gi|158591544|gb|EDP30157.1| Homeobox domain containing protein [Brugia malayi]
Unigene14006_All	1378	1e-20	PREDICTED: similar to ZFH-5 [Monodelphis domestica]
Unigene14006_All	1378	1e-18	PREDICTED: similar to zinc-finger homeodomain protein 4 isoform 1 [Gallus gallus] >gi|126253844|sp|O73590.2|ZFHX4_CHICK RecName: Full=Zinc finger homeobox protein 4; AltName: Full=Zinc finger homeodomain protein 4; Short=ZFH-4; AltName: Full=Zinc finger/apterous-related homeobox protein
Unigene14006_All	1378	1e-18	PREDICTED: similar to zinc-finger homeodomain protein 4 isoform 2 [Gallus gallus]
Unigene14006_All	1378	1e-18	PREDICTED: similar to Zinc finger protein 409 [Canis familiaris]
Unigene14006_All	1378	9e-18	PREDICTED: Lim1-like [Bos taurus] >gi|297479064|ref|XP_002690489.1| PREDICTED: Lim1-like [Bos taurus] >gi|296483679|gb|DAA25794.1| Lim1-like [Bos taurus]
Unigene14006_All	1378	9e-18	PREDICTED: zinc finger homeodomain 4 [Taeniopygia guttata]
Unigene14006_All	1378	1e-17	PREDICTED: LOW QUALITY PROTEIN: zinc finger homeobox protein 2-like [Ailuropoda melanoleuca]
Unigene14006_All	1378	1e-17	rCG23518 [Rattus norvegicus]
Unigene14006_All	1378	1e-17	zinc finger homeobox protein 2 [Rattus norvegicus]
Unigene14006_All	1378	3e-17	PREDICTED: zinc finger homeobox protein 3-like [Xenopus (Silurana) tropicalis]
Unigene14006_All	1378	5e-17	mCG133735 [Mus musculus]
Unigene14006_All	1378	5e-17	PREDICTED: similar to ZFH-5 [Mus musculus]
Unigene14006_All	1378	5e-17	zinc finger homeobox protein 2 [Mus musculus] >gi|85677391|dbj|BAE78491.1| ZFH-5 [Mus musculus]
Unigene14007_All	750	9e-17	high mobility group protein A [Bombyx mori] >gi|89213696|gb|ABD64155.1| HMGA [Bombyx mori]
Unigene14007_All	750	5e-15	ACYPI000883 [Acyrthosiphon pisum]
Unigene14007_All	750	1e-13	ACYPI009828 [Acyrthosiphon pisum]
Unigene14007_All	750	1e-13	ACYPI009828 [Acyrthosiphon pisum]
Unigene14007_All	750	6e-10	AGAP004213-PA [Anopheles gambiae str. PEST] >gi|116128953|gb|EAA08685.2| AGAP004213-PA [Anopheles gambiae str. PEST]
Unigene14007_All	750	8e-10	high mobility group protein HMGI-C [Danio rerio] >gi|41351052|gb|AAH65852.1| High mobility group AT-hook 2 [Danio rerio]
Unigene14007_All	750	2e-09	novel protein similar to vertebrate erythrocyte membrane protein band 4.1 (elliptocytosis 1, RH-linked) (EPB41) [Danio rerio]
Unigene14007_All	750	4e-09	high mobility group protein HMGI-C [Gallus gallus] >gi|3063659|gb|AAC33439.1| high mobility group protein I-C [Gallus gallus]
Unigene14007_All	750	5e-09	high mobility group AT-hook 1 [Danio rerio] >gi|46249904|gb|AAH68355.1| Zgc:85677 protein [Danio rerio] >gi|66911891|gb|AAH97025.1| Zgc:85677 [Danio rerio] >gi|68262419|gb|AAH44554.1| Zgc:85677 [Danio rerio] >gi|182888662|gb|AAI64042.1| Zgc:85677 protein [Danio rerio]
Unigene14007_All	750	9e-09	Zgc:153948 [Danio rerio]
Unigene14007_All	750	9e-09	RecName: Full=High mobility group protein I; Short=HMG-I; AltName: Full=High mobility group AT-hook protein 1; Short=High mobility group protein A1; AltName: Full=cHMG1 >gi|534933|emb|CAA85365.1| high mobility group protein I/Y [Chironomus tentans]
Unigene14007_All	750	9e-09	high mobility group protein I/Y [Chironomus tentans]
Unigene14007_All	750	3e-08	high mobility group protein HMGI-C isoform a [Homo sapiens] >gi|109097664|ref|XP_001117025.1| PREDICTED: high mobility group protein HMGI-C isoform 1 [Macaca mulatta] >gi|297692376|ref|XP_002823531.1| PREDICTED: high mobility group protein HMGI-C-like isoform 2 [Pongo abelii] >gi|1708263|sp|P52926.1|HMGA2_HUMAN RecName: Full=High mobility group protein HMGI-C; AltName: Full=High mobility group AT…
Unigene14007_All	750	6e-08	PREDICTED: high mobility group protein HMGI-C-like isoform 1 [Callithrix jacchus]
Unigene14007_All	750	1e-07	PREDICTED: similar to DNA-directed RNA polymerase II largest subunit [Mus musculus]
Unigene14007_All	750	1e-07	Ab1-013 [Rattus norvegicus] >gi|149025437|gb|EDL81804.1| rCG63023 [Rattus norvegicus]
Unigene14007_All	750	1e-07	Ab1-042 [Rattus norvegicus]
Unigene14007_All	750	2e-07	AGAP000318-PA [Anopheles gambiae str. PEST] >gi|157018844|gb|EDO64343.1| AGAP000318-PA [Anopheles gambiae str. PEST]
Unigene14007_All	750	2e-07	LOC100135170 protein [Xenopus (Silurana) tropicalis]
Unigene14007_All	750	3e-07	reproductive homeobox on X chromosome 8 [Mus musculus]
Unigene14008_All	451	2e-40	PREDICTED: similar to Nuclear transport factor-2 CG1740-PA [Apis mellifera]
Unigene14008_All	451	2e-40	PREDICTED: similar to ENSANGP00000019436 [Nasonia vitripennis]
Unigene14008_All	451	5e-39	ACYPI006036 [Acyrthosiphon pisum]
Unigene14008_All	451	2e-38	nuclear transport factor-2 [Tribolium castaneum]
Unigene14008_All	451	2e-36	AGAP000498-PA [Anopheles gambiae str. PEST] >gi|55243300|gb|EAA06639.2| AGAP000498-PA [Anopheles gambiae str. PEST]
Unigene14008_All	451	4e-36	nuclear transport factor 2 [Aedes aegypti]
Unigene14008_All	451	1e-35	AGAP007024-PA [Anopheles gambiae str. PEST] >gi|55245829|gb|EAA04212.2| AGAP007024-PA [Anopheles gambiae str. PEST]
Unigene14008_All	451	9e-34	GH16820 [Drosophila grimshawi] >gi|193898496|gb|EDV97362.1| GH16820 [Drosophila grimshawi]
Unigene14008_All	451	3e-33	GA14503 [Drosophila pseudoobscura pseudoobscura] >gi|198149281|gb|EAL31475.2| GA14503 [Drosophila pseudoobscura pseudoobscura]
Unigene14008_All	451	3e-33	GL16396 [Drosophila persimilis] >gi|194105084|gb|EDW27127.1| GL16396 [Drosophila persimilis]
Unigene14008_All	451	6e-33	nuclear transport factor 2-like protein [Maconellicoccus hirsutus]
Unigene14008_All	451	8e-33	GM23057 [Drosophila sechellia] >gi|194134820|gb|EDW56336.1| GM23057 [Drosophila sechellia]
Unigene14008_All	451	8e-33	GI15738 [Drosophila mojavensis] >gi|193908550|gb|EDW07417.1| GI15738 [Drosophila mojavensis]
Unigene14008_All	451	1e-32	GD17509 [Drosophila simulans] >gi|194204923|gb|EDX18499.1| GD17509 [Drosophila simulans]
Unigene14008_All	451	1e-32	GH12206 [Drosophila grimshawi] >gi|193900937|gb|EDV99803.1| GH12206 [Drosophila grimshawi]
Unigene14008_All	451	2e-32	nuclear transport factor-2 [Drosophila yakuba] >gi|194189473|gb|EDX03057.1| nuclear transport factor-2 [Drosophila yakuba]
Unigene14008_All	451	2e-32	GJ18599 [Drosophila virilis] >gi|194150278|gb|EDW65969.1| GJ18599 [Drosophila virilis]
Unigene14008_All	451	2e-32	GF21708 [Drosophila ananassae] >gi|190622874|gb|EDV38398.1| GF21708 [Drosophila ananassae]
Unigene14008_All	451	2e-32	nuclear transport factor-2, isoform B [Drosophila melanogaster] >gi|158031883|gb|ABW09457.1| nuclear transport factor-2, isoform B [Drosophila melanogaster]
Unigene14008_All	451	2e-32	CG1740 protein [Drosophila melanogaster] >gi|33303494|gb|AAQ02314.1| CG1740 protein [Drosophila melanogaster] >gi|33303496|gb|AAQ02315.1| CG1740 protein [Drosophila melanogaster] >gi|33303498|gb|AAQ02316.1| CG1740 protein [Drosophila melanogaster] >gi|33303500|gb|AAQ02317.1| CG1740 protein [Drosophila melanogaster] >gi|33303502|gb|AAQ02318.1| CG1740 protein [Drosophila melanogaster] >gi|33303504|…
Unigene14009_All	546	4e-18	GK12224 [Drosophila willistoni] >gi|194166839|gb|EDW81740.1| GK12224 [Drosophila willistoni]
Unigene14009_All	546	1e-17	AGAP007893-PA [Anopheles gambiae str. PEST] >gi|157015151|gb|EDO63609.1| AGAP007893-PA [Anopheles gambiae str. PEST]
Unigene14009_All	546	3e-17	GH18369 [Drosophila grimshawi] >gi|193894382|gb|EDV93248.1| GH18369 [Drosophila grimshawi]
Unigene14009_All	546	6e-17	GL24382 [Drosophila persimilis] >gi|198451756|ref|XP_002137357.1| l(3)87Df [Drosophila pseudoobscura pseudoobscura] >gi|194102830|gb|EDW24873.1| GL24382 [Drosophila persimilis] >gi|198131631|gb|EDY67915.1| l(3)87Df [Drosophila pseudoobscura pseudoobscura]
Unigene14009_All	546	2e-16	GD18874 [Drosophila simulans] >gi|194199551|gb|EDX13127.1| GD18874 [Drosophila simulans]
Unigene14009_All	546	2e-16	GM24077 [Drosophila sechellia] >gi|194120327|gb|EDW42370.1| GM24077 [Drosophila sechellia]
Unigene14009_All	546	2e-16	lethal (3) 87Df [Drosophila melanogaster] >gi|7299712|gb|AAF54894.1| lethal (3) 87Df [Drosophila melanogaster] >gi|21430930|gb|AAM51143.1| SD27354p [Drosophila melanogaster] >gi|220950300|gb|ACL87693.1| l(3)87Df-PA [synthetic construct] >gi|220959250|gb|ACL92168.1| l(3)87Df-PA [synthetic construct]
Unigene14009_All	546	2e-16	GF16929 [Drosophila ananassae] >gi|190627102|gb|EDV42626.1| GF16929 [Drosophila ananassae]
Unigene14009_All	546	2e-16	lethal 87Df [Culex quinquefasciatus] >gi|167879189|gb|EDS42572.1| lethal 87Df [Culex quinquefasciatus]
Unigene14009_All	546	2e-16	PREDICTED: similar to lethal (3) 87Df CG7620-PA [Tribolium castaneum]
Unigene14009_All	546	3e-16	GE26235 [Drosophila yakuba] >gi|194183571|gb|EDW97182.1| GE26235 [Drosophila yakuba]
Unigene14009_All	546	3e-16	GG19368 [Drosophila erecta] >gi|190652028|gb|EDV49283.1| GG19368 [Drosophila erecta]
Unigene14009_All	546	4e-16	PREDICTED: similar to GA20485-PA [Nasonia vitripennis]
Unigene14009_All	546	8e-16	GI23358 [Drosophila mojavensis] >gi|193915516|gb|EDW14383.1| GI23358 [Drosophila mojavensis]
Unigene14009_All	546	3e-15	GJ10352 [Drosophila virilis] >gi|194142905|gb|EDW59308.1| GJ10352 [Drosophila virilis]
Unigene14009_All	546	2e-12	possible ribosomal protein [Drosophila melanogaster]
Unigene14009_All	546	2e-12	pipsqueak-l(3)S12-fusion protein [Drosophila melanogaster]
Unigene14009_All	546	6e-11	PREDICTED: protein FAM36A-like [Macaca mulatta]
Unigene14009_All	546	2e-10	PREDICTED: protein FAM36A-like [Callithrix jacchus] >gi|296230810|ref|XP_002760897.1| PREDICTED: protein FAM36A-like [Callithrix jacchus]
Unigene14009_All	546	2e-10	MGC115185 protein [Xenopus laevis]
Unigene14010_All	707	6e-15	GK20570 [Drosophila willistoni] >gi|194164700|gb|EDW79601.1| GK20570 [Drosophila willistoni]
Unigene14010_All	707	3e-14	GJ11782 [Drosophila virilis] >gi|194154844|gb|EDW70028.1| GJ11782 [Drosophila virilis]
Unigene14010_All	707	3e-14	GI13422 [Drosophila mojavensis] >gi|193919935|gb|EDW18802.1| GI13422 [Drosophila mojavensis]
Unigene14010_All	707	8e-14	GF23449 [Drosophila ananassae] >gi|190625857|gb|EDV41381.1| GF23449 [Drosophila ananassae]
Unigene14010_All	707	3e-12	GH16761 [Drosophila grimshawi] >gi|193898416|gb|EDV97282.1| GH16761 [Drosophila grimshawi]
Unigene14010_All	707	4e-11	GD12057 [Drosophila simulans] >gi|194197942|gb|EDX11518.1| GD12057 [Drosophila simulans]
Unigene14010_All	707	4e-11	GM22082 [Drosophila sechellia] >gi|194122457|gb|EDW44500.1| GM22082 [Drosophila sechellia]
Unigene14010_All	707	2e-10	CG14450 [Drosophila melanogaster] >gi|7296570|gb|AAF51853.1| CG14450 [Drosophila melanogaster] >gi|17946446|gb|AAL49256.1| RE67859p [Drosophila melanogaster] >gi|220948812|gb|ACL86949.1| CG14450-PA [synthetic construct]
Unigene14010_All	707	3e-10	AGAP012330-PA [Anopheles gambiae str. PEST] >gi|157013069|gb|EAL38690.3| AGAP012330-PA [Anopheles gambiae str. PEST]
Unigene14010_All	707	5e-10	GL18119 [Drosophila persimilis] >gi|194118006|gb|EDW40049.1| GL18119 [Drosophila persimilis]
Unigene14010_All	707	5e-10	GG13172 [Drosophila erecta] >gi|190655543|gb|EDV52786.1| GG13172 [Drosophila erecta]
Unigene14010_All	707	7e-10	GA12996 [Drosophila pseudoobscura pseudoobscura] >gi|198150806|gb|EAL29894.2| GA12996 [Drosophila pseudoobscura pseudoobscura]
Unigene14010_All	707	1e-09	GE19493 [Drosophila yakuba] >gi|194181943|gb|EDW95554.1| GE19493 [Drosophila yakuba]
Unigene14010_All	707	3e-07	LOC534204 protein [Bos taurus]
Unigene14010_All	707	6e-07	PREDICTED: UPF0629 protein C17orf42 homolog [Ailuropoda melanoleuca]
Unigene14010_All	707	1e-06	RecName: Full=UPF0629 protein C17orf42 >gi|119600696|gb|EAW80290.1| chromosome 17 open reading frame 42, isoform CRA_a [Homo sapiens] >gi|119600698|gb|EAW80292.1| chromosome 17 open reading frame 42, isoform CRA_a [Homo sapiens]
Unigene14010_All	707	4e-06	C17orf42 protein [Homo sapiens]
Unigene14010_All	707	5e-06	PREDICTED: similar to LOC534204 protein [Equus caballus]
Unigene14010_All	707	8e-06	PREDICTED: UPF0629 protein C17orf42-like [Pongo abelii]
Unigene14010_All	707	8e-06	RecName: Full=UPF0629 protein C17orf42 homolog >gi|56237943|emb|CAI26035.1| novel protein (1110002N22Rik) [Mus musculus] >gi|148683677|gb|EDL15624.1| RIKEN cDNA 1110002N22 [Mus musculus]
Unigene14011_All	890	8e-24	PREDICTED: similar to CG3823 CG3823-PA [Tribolium castaneum]
Unigene14011_All	890	2e-17	PREDICTED: similar to CG11550-PA [Apis mellifera]
Unigene14011_All	890	1e-16	AGAP004200-PA [Anopheles gambiae str. PEST] >gi|157017620|gb|EAA08602.4| AGAP004200-PA [Anopheles gambiae str. PEST]
Unigene14011_All	890	2e-16	AGAP003734-PA [Anopheles gambiae str. PEST] >gi|157019064|gb|EAA06063.4| AGAP003734-PA [Anopheles gambiae str. PEST]
Unigene14011_All	890	3e-16	PREDICTED: similar to AGAP004200-PA [Tribolium castaneum]
Unigene14011_All	890	3e-16	PREDICTED: similar to GA11062-PA [Tribolium castaneum]
Unigene14011_All	890	3e-16	PREDICTED: similar to CG3823 CG3823-PA [Tribolium castaneum]
Unigene14011_All	890	1e-15	PREDICTED: similar to AGAP004200-PA [Tribolium castaneum]
Unigene14011_All	890	3e-15	PREDICTED: similar to AGAP004200-PA [Acyrthosiphon pisum]
Unigene14011_All	890	5e-15	PREDICTED: similar to CG11550-PA [Apis mellifera]
Unigene14011_All	890	2e-14	PREDICTED: similar to GA11062-PA [Nasonia vitripennis]
Unigene14011_All	890	7e-14	GG14766 [Drosophila erecta] >gi|190652883|gb|EDV50126.1| GG14766 [Drosophila erecta]
Unigene14011_All	890	1e-13	GM14386 [Drosophila sechellia] >gi|194127970|gb|EDW50013.1| GM14386 [Drosophila sechellia]
Unigene14011_All	890	1e-13	PREDICTED: similar to GA11062-PA [Tribolium castaneum]
Unigene14011_All	890	2e-13	PREDICTED: similar to GA15415-PA [Acyrthosiphon pisum]
Unigene14011_All	890	2e-13	GE21129 [Drosophila yakuba] >gi|194179189|gb|EDW92800.1| GE21129 [Drosophila yakuba]
Unigene14011_All	890	8e-13	PREDICTED: similar to RH74717p [Nasonia vitripennis]
Unigene14011_All	890	1e-12	RE21492p [Drosophila melanogaster]
Unigene14011_All	890	1e-12	CG33966 [Drosophila melanogaster] >gi|84796072|gb|ABC66124.1| CG33966 [Drosophila melanogaster]
Unigene14011_All	890	2e-12	GL16163 [Drosophila persimilis] >gi|198462524|ref|XP_002135312.1| GA28411 [Drosophila pseudoobscura pseudoobscura] >gi|194111003|gb|EDW33046.1| GL16163 [Drosophila persimilis] >gi|198150861|gb|EDY73939.1| GA28411 [Drosophila pseudoobscura pseudoobscura]
Unigene14012_All	589	6e-13	PREDICTED: similar to protein kinase protein [Tribolium castaneum]
Unigene14012_All	589	2e-12	PREDICTED: similar to protein kinase protein, partial [Tribolium castaneum]
Unigene14012_All	589	4e-11	PREDICTED: similar to protein kinase protein [Acyrthosiphon pisum]
Unigene14012_All	589	8e-10	PREDICTED: similar to ACK1 protein [Strongylocentrotus purpuratus] >gi|115934687|ref|XP_001180767.1| PREDICTED: similar to ACK1 protein [Strongylocentrotus purpuratus]
Unigene14012_All	589	1e-09	PREDICTED: similar to tyrosine kinase, non-receptor, 2 isoform 1 [Canis familiaris]
Unigene14012_All	589	1e-09	PREDICTED: similar to Activated CDC42 kinase 1 (ACK-1) (Non-receptor protein tyrosine kinase Ack) (Tyrosine kinase non-receptor protein 2) isoform 2 [Canis familiaris]
Unigene14012_All	589	2e-09	PREDICTED: similar to non-receptor protein tyrosine kinase ACK [Ornithorhynchus anatinus]
Unigene14012_All	589	4e-09	PREDICTED: similar to protein kinase protein [Nasonia vitripennis]
Unigene14012_All	589	2e-08	PREDICTED: similar to ACK1 protein [Monodelphis domestica]
Unigene14012_All	589	3e-08	PREDICTED: similar to tyrosine kinase, non-receptor, 2 [Taeniopygia guttata]
Unigene14012_All	589	6e-08	PREDICTED: Ack-like [Danio rerio]
Unigene14012_All	589	8e-08	PREDICTED: LOW QUALITY PROTEIN: activated CDC42 kinase 1-like, partial [Pongo abelii]
Unigene14012_All	589	8e-08	tyrosine kinase, non-receptor, 2, isoform CRA_d [Mus musculus]
Unigene14012_All	589	8e-08	activated CDC42 kinase 1 isoform 1 [Mus musculus] >gi|148665385|gb|EDK97801.1| tyrosine kinase, non-receptor, 2, isoform CRA_a [Mus musculus]
Unigene14012_All	589	8e-08	tyrosine kinase, non-receptor, 2, isoform CRA_b [Mus musculus] >gi|148665390|gb|EDK97806.1| tyrosine kinase, non-receptor, 2, isoform CRA_b [Mus musculus]
Unigene14012_All	589	8e-08	non-receptor protein tyrosine kinase ACK [Mus musculus]
Unigene14012_All	589	8e-08	Tnk2 protein [Mus musculus]
Unigene14012_All	589	8e-08	non-receptor protein tyrosine kinase Ack [Mus musculus]
Unigene14012_All	589	2e-07	tyrosine kinase, non-receptor, 2 [Bos taurus]
Unigene14012_All	589	2e-07	activated CDC42 kinase 1 [Bos taurus] >gi|122144677|sp|Q17R13.1|ACK1_BOVIN RecName: Full=Activated CDC42 kinase 1; Short=ACK-1; AltName: Full=Tyrosine kinase non-receptor protein 2; AltName: Full=Activated CDC42 kinase 2 >gi|109659134|gb|AAI18082.1| ACK1 protein [Bos taurus]
Unigene14013_All	756	2e-61	ACYPI009739 [Acyrthosiphon pisum]
Unigene14013_All	756	2e-61	PREDICTED: similar to Vacuolar protein sorting-associated protein 28 homolog [Acyrthosiphon pisum]
Unigene14013_All	756	5e-61	PREDICTED: similar to Vacuolar protein sorting-associated protein 28 homolog [Tribolium castaneum]
Unigene14013_All	756	1e-59	PREDICTED: similar to VPS28 protein homolog [Apis mellifera]
Unigene14013_All	756	1e-59	AGAP005344-PA [Anopheles gambiae str. PEST] >gi|21298618|gb|EAA10763.1| AGAP005344-PA [Anopheles gambiae str. PEST]
Unigene14013_All	756	2e-59	vacuolar protein sorting-associated protein 28 [Culex quinquefasciatus] >gi|167878180|gb|EDS41563.1| vacuolar protein sorting-associated protein 28 [Culex quinquefasciatus]
Unigene14013_All	756	3e-59	GE23355 [Drosophila yakuba] >gi|194175672|gb|EDW89283.1| GE23355 [Drosophila yakuba]
Unigene14013_All	756	3e-59	GG10681 [Drosophila erecta] >gi|190662390|gb|EDV59582.1| GG10681 [Drosophila erecta]
Unigene14013_All	756	3e-59	vacuolar protein sorting 28 [Drosophila melanogaster] >gi|195332335|ref|XP_002032854.1| GM20728 [Drosophila sechellia] >gi|195551440|ref|XP_002076228.1| GD15294 [Drosophila simulans] >gi|195581436|ref|XP_002080540.1| GD10195 [Drosophila simulans] >gi|13124624|sp|Q9V359.1|VPS28_DROME RecName: Full=Vacuolar protein sorting-associated protein 28 homolog; AltName: Full=ESCRT-I complex subunit VPS28 >…
Unigene14013_All	756	1e-58	vacuolar sorting protein vPS28 [Glossina morsitans morsitans]
Unigene14013_All	756	2e-58	GA11803 [Drosophila pseudoobscura pseudoobscura] >gi|198135970|gb|EAL25240.2| GA11803 [Drosophila pseudoobscura pseudoobscura]
Unigene14013_All	756	2e-58	GH19992 [Drosophila grimshawi] >gi|193903398|gb|EDW02265.1| GH19992 [Drosophila grimshawi]
Unigene14013_All	756	5e-58	GL10599 [Drosophila persimilis] >gi|194110092|gb|EDW32135.1| GL10599 [Drosophila persimilis]
Unigene14013_All	756	5e-58	GF11216 [Drosophila ananassae] >gi|190622314|gb|EDV37838.1| GF11216 [Drosophila ananassae]
Unigene14013_All	756	6e-58	GK23164 [Drosophila willistoni] >gi|194170690|gb|EDW85591.1| GK23164 [Drosophila willistoni]
Unigene14013_All	756	6e-58	GJ20232 [Drosophila virilis] >gi|194145186|gb|EDW61582.1| GJ20232 [Drosophila virilis]
Unigene14013_All	756	1e-57	GI20167 [Drosophila mojavensis] >gi|193909962|gb|EDW08829.1| GI20167 [Drosophila mojavensis]
Unigene14013_All	756	2e-54	PREDICTED: vacuolar protein sorting 28-like [Oryctolagus cuniculus]
Unigene14013_All	756	7e-54	vacuolar protein sorting-associated protein 28 homolog [Salmo salar] >gi|197632099|gb|ACH70773.1| vacuolar protein sorting 28 [Salmo salar] >gi|209154310|gb|ACI33387.1| Vacuolar protein sorting-associated protein 28 homolog [Salmo salar]
Unigene14013_All	756	7e-54	vacuolar protein sorting-associated protein 28 homolog [Danio rerio] >gi|34784075|gb|AAH56741.1| Vacuolar protein sorting 28 (yeast) [Danio rerio]
Unigene14014_All	896	1e-136	PREDICTED: similar to AGAP007006-PA [Acyrthosiphon pisum]
Unigene14014_All	896	1e-118	PREDICTED: similar to ENSANGP00000007666 [Nasonia vitripennis]
Unigene14014_All	896	1e-116	PREDICTED: similar to jitterbug CG30092-PD, isoform D [Apis mellifera]
Unigene14014_All	896	1e-115	filamin [Culex quinquefasciatus] >gi|167864814|gb|EDS28197.1| filamin [Culex quinquefasciatus]
Unigene14014_All	896	1e-115	AGAP007006-PC [Anopheles gambiae str. PEST] >gi|157020479|gb|EDO64726.1| AGAP007006-PC [Anopheles gambiae str. PEST]
Unigene14014_All	896	1e-115	AGAP007006-PB [Anopheles gambiae str. PEST] >gi|157020478|gb|EDO64725.1| AGAP007006-PB [Anopheles gambiae str. PEST]
Unigene14014_All	896	1e-115	AGAP007006-PA [Anopheles gambiae str. PEST] >gi|157020477|gb|EAA04688.4| AGAP007006-PA [Anopheles gambiae str. PEST]
Unigene14014_All	896	1e-114	PREDICTED: similar to jitterbug CG30092-PD [Tribolium castaneum]
Unigene14014_All	896	1e-111	GG20097 [Drosophila erecta] >gi|190659472|gb|EDV56685.1| GG20097 [Drosophila erecta]
Unigene14014_All	896	1e-111	GF11329 [Drosophila ananassae] >gi|190622081|gb|EDV37605.1| GF11329 [Drosophila ananassae]
Unigene14014_All	896	1e-111	GI19228 [Drosophila mojavensis] >gi|193910216|gb|EDW09083.1| GI19228 [Drosophila mojavensis]
Unigene14014_All	896	1e-111	GA15644 [Drosophila pseudoobscura pseudoobscura] >gi|198135806|gb|EAL25075.2| GA15644 [Drosophila pseudoobscura pseudoobscura]
Unigene14014_All	896	1e-111	GK21843 [Drosophila willistoni] >gi|194159400|gb|EDW74301.1| GK21843 [Drosophila willistoni]
Unigene14014_All	896	1e-111	GE11838 [Drosophila yakuba] >gi|194178231|gb|EDW91842.1| GE11838 [Drosophila yakuba]
Unigene14014_All	896	1e-111	GJ20303 [Drosophila virilis] >gi|194145047|gb|EDW61443.1| GJ20303 [Drosophila virilis]
Unigene14014_All	896	1e-111	GH22092 [Drosophila grimshawi] >gi|193903761|gb|EDW02628.1| GH22092 [Drosophila grimshawi]
Unigene14014_All	896	1e-111	jitterbug, isoform I [Drosophila melanogaster] >gi|272432646|gb|ACZ94530.1| jitterbug, isoform I [Drosophila melanogaster]
Unigene14014_All	896	1e-111	jitterbug, isoform F [Drosophila melanogaster] >gi|272432643|gb|AAF46895.5| jitterbug, isoform F [Drosophila melanogaster]
Unigene14014_All	896	1e-111	jitterbug, isoform E [Drosophila melanogaster] >gi|272432642|gb|AAF46896.4| jitterbug, isoform E [Drosophila melanogaster]
Unigene14014_All	896	1e-111	RE40504p [Drosophila melanogaster]
Unigene14015_All	569	2e-60	enoyl-CoA hydratase [Glossina morsitans morsitans]
Unigene14015_All	569	1e-59	GK15915 [Drosophila willistoni] >gi|194159975|gb|EDW74876.1| GK15915 [Drosophila willistoni]
Unigene14015_All	569	3e-59	PREDICTED: methylglutaconyl-CoA hydratase, mitochondrial-like [Ailuropoda melanoleuca]
Unigene14015_All	569	3e-59	GA21314 [Drosophila pseudoobscura pseudoobscura] >gi|198135372|gb|EAL24663.2| GA21314 [Drosophila pseudoobscura pseudoobscura]
Unigene14015_All	569	3e-59	GL11030 [Drosophila persimilis] >gi|194109271|gb|EDW31314.1| GL11030 [Drosophila persimilis]
Unigene14015_All	569	7e-59	GH22640 [Drosophila grimshawi] >gi|193899626|gb|EDV98492.1| GH22640 [Drosophila grimshawi]
Unigene14015_All	569	7e-59	methylglutaconyl-CoA hydratase, mitochondrial [Danio rerio] >gi|50417177|gb|AAH78266.1| AU RNA binding protein/enoyl-Coenzyme A hydratase [Danio rerio]
Unigene14015_All	569	9e-59	GJ21004 [Drosophila virilis] >gi|194143796|gb|EDW60192.1| GJ21004 [Drosophila virilis]
Unigene14015_All	569	9e-59	GI21154 [Drosophila mojavensis] >gi|193911681|gb|EDW10548.1| GI21154 [Drosophila mojavensis]
Unigene14015_All	569	3e-58	PREDICTED: similar to Methylglutaconyl-CoA hydratase, mitochondrial precursor (AU-specific RNA-binding enoyl-CoA hydratase) (AU-binding protein/enoyl-CoA hydratase) [Ciona intestinalis]
Unigene14015_All	569	3e-58	methylglutaconyl-CoA hydratase, mitochondrial [Culex quinquefasciatus] >gi|167864369|gb|EDS27752.1| methylglutaconyl-CoA hydratase, mitochondrial [Culex quinquefasciatus]
Unigene14015_All	569	4e-58	PREDICTED: similar to Methylglutaconyl-CoA hydratase, mitochondrial precursor (AU-specific RNA-binding enoyl-CoA hydratase) (AU-binding protein/enoyl-CoA hydratase) [Canis familiaris]
Unigene14015_All	569	6e-58	PREDICTED: similar to AU RNA binding protein/enoyl-coenzyme A hydratase [Taeniopygia guttata]
Unigene14015_All	569	8e-58	PREDICTED: methylglutaconyl-CoA hydratase, mitochondrial-like isoform 1 [Callithrix jacchus]
Unigene14015_All	569	8e-58	PREDICTED: similar to Methylglutaconyl-CoA hydratase, mitochondrial precursor (AU-specific RNA-binding enoyl-CoA hydratase) (AU-binding protein/enoyl-CoA hydratase) [Equus caballus]
Unigene14015_All	569	8e-58	GF11465 [Drosophila ananassae] >gi|190621823|gb|EDV37347.1| GF11465 [Drosophila ananassae]
Unigene14015_All	569	2e-57	PREDICTED: methylglutaconyl-CoA hydratase, mitochondrial isoform 3 [Macaca mulatta]
Unigene14015_All	569	2e-57	PREDICTED: similar to AU-binding protein/Enoyl-CoA hydratase isoform 6 [Pan troglodytes]
Unigene14015_All	569	2e-57	Methylglutaconyl-CoA hydratase, mitochondrial precursor [Caligus rogercresseyi]
Unigene14015_All	569	2e-57	methylglutaconyl-CoA hydratase, mitochondrial precursor [Homo sapiens] >gi|37076898|sp|Q13825.1|AUHM_HUMAN RecName: Full=Methylglutaconyl-CoA hydratase, mitochondrial; AltName: Full=AU-specific RNA-binding enoyl-CoA hydratase; Short=AU-binding protein/enoyl-CoA hydratase; Flags: Precursor >gi|780241|emb|CAA56260.1| AU-binding protein/Enoyl-CoA hydratase [Homo sapiens] >gi|55662199|emb|CAH72266.1|…
Unigene14017_All	1615	3e-94	GA21321 [Drosophila pseudoobscura pseudoobscura] >gi|195148946|ref|XP_002015423.1| GL11031 [Drosophila persimilis] >gi|54635259|gb|EAL24662.1| GA21321 [Drosophila pseudoobscura pseudoobscura] >gi|194109270|gb|EDW31313.1| GL11031 [Drosophila persimilis]
Unigene14017_All	1615	4e-92	GG22563 [Drosophila erecta] >gi|190659062|gb|EDV56275.1| GG22563 [Drosophila erecta]
Unigene14017_All	1615	1e-91	GE13433 [Drosophila yakuba] >gi|194177117|gb|EDW90728.1| GE13433 [Drosophila yakuba]
Unigene14017_All	1615	1e-91	CG8785, isoform A [Drosophila melanogaster] >gi|24653137|ref|NP_725205.1| CG8785, isoform B [Drosophila melanogaster] >gi|16767902|gb|AAL28169.1| GH04538p [Drosophila melanogaster] >gi|21627328|gb|AAF58478.2| CG8785, isoform A [Drosophila melanogaster] >gi|21627329|gb|AAM68639.1| CG8785, isoform B [Drosophila melanogaster]
Unigene14017_All	1615	1e-90	GD25825 [Drosophila simulans] >gi|194193237|gb|EDX06813.1| GD25825 [Drosophila simulans]
Unigene14017_All	1615	2e-90	GM20346 [Drosophila sechellia] >gi|194125565|gb|EDW47608.1| GM20346 [Drosophila sechellia]
Unigene14017_All	1615	3e-90	GK21740 [Drosophila willistoni] >gi|194159179|gb|EDW74080.1| GK21740 [Drosophila willistoni]
Unigene14017_All	1615	1e-89	PREDICTED: similar to ENSANGP00000016729, partial [Nasonia vitripennis]
Unigene14017_All	1615	2e-89	GI21155 [Drosophila mojavensis] >gi|193911682|gb|EDW10549.1| GI21155 [Drosophila mojavensis]
Unigene14017_All	1615	5e-89	GH22642 [Drosophila grimshawi] >gi|193899625|gb|EDV98491.1| GH22642 [Drosophila grimshawi]
Unigene14017_All	1615	6e-89	PREDICTED: similar to proton-coupled amino acid transporter 1 [Acyrthosiphon pisum]
Unigene14017_All	1615	6e-89	GF11466 [Drosophila ananassae] >gi|190621822|gb|EDV37346.1| GF11466 [Drosophila ananassae]
Unigene14017_All	1615	2e-88	amino acid transporter protein [Glossina morsitans morsitans]
Unigene14017_All	1615	4e-88	AGAP009897-PA [Anopheles gambiae str. PEST] >gi|157014094|gb|EAA14383.5| AGAP009897-PA [Anopheles gambiae str. PEST]
Unigene14017_All	1615	8e-88	amino acid transporter [Aedes aegypti] >gi|108876914|gb|EAT41139.1| amino acid transporter [Aedes aegypti]
Unigene14017_All	1615	1e-87	GJ21005 [Drosophila virilis] >gi|194143795|gb|EDW60191.1| GJ21005 [Drosophila virilis]
Unigene14017_All	1615	3e-87	proton-coupled amino acid transporter 1 [Culex quinquefasciatus] >gi|167872286|gb|EDS35669.1| proton-coupled amino acid transporter 1 [Culex quinquefasciatus]
Unigene14017_All	1615	6e-85	GE20249 [Drosophila yakuba] >gi|194180451|gb|EDW94062.1| GE20249 [Drosophila yakuba]
Unigene14017_All	1615	2e-84	GK12679 [Drosophila willistoni] >gi|194163959|gb|EDW78860.1| GK12679 [Drosophila willistoni]
Unigene14017_All	1615	3e-84	GF23811 [Drosophila ananassae] >gi|190625142|gb|EDV40666.1| GF23811 [Drosophila ananassae]
Unigene14018_All	1186	1e-102	PREDICTED: similar to ENSANGP00000021162 [Nasonia vitripennis]
Unigene14018_All	1186	1e-101	PREDICTED: similar to CG15117-PA, isoform A [Apis mellifera]
Unigene14018_All	1186	1e-100	PREDICTED: similar to CG15117 CG15117-PA [Tribolium castaneum]
Unigene14018_All	1186	2e-99	PREDICTED: similar to CG15117 CG15117-PA [Acyrthosiphon pisum]
Unigene14018_All	1186	4e-99	GK17841 [Drosophila willistoni] >gi|194164871|gb|EDW79772.1| GK17841 [Drosophila willistoni]
Unigene14018_All	1186	7e-98	GH22627 [Drosophila grimshawi] >gi|193899649|gb|EDV98515.1| GH22627 [Drosophila grimshawi]
Unigene14018_All	1186	1e-97	PREDICTED: similar to ENSANGP00000021162 [Nasonia vitripennis]
Unigene14018_All	1186	2e-97	GJ19669 [Drosophila virilis] >gi|194156240|gb|EDW71424.1| GJ19669 [Drosophila virilis]
Unigene14018_All	1186	4e-97	AGAP011859-PA [Anopheles gambiae str. PEST] >gi|157013355|gb|EAA00101.4| AGAP011859-PA [Anopheles gambiae str. PEST]
Unigene14018_All	1186	8e-97	GM19850 [Drosophila sechellia] >gi|194126512|gb|EDW48555.1| GM19850 [Drosophila sechellia]
Unigene14018_All	1186	2e-96	PREDICTED: similar to Beta-glucuronidase, partial [Hydra magnipapillata]
Unigene14018_All	1186	2e-96	AT19585p [Drosophila melanogaster]
Unigene14018_All	1186	2e-96	GL11760 [Drosophila persimilis] >gi|198461701|ref|XP_001362089.2| GA13505 [Drosophila pseudoobscura pseudoobscura] >gi|194111616|gb|EDW33659.1| GL11760 [Drosophila persimilis] >gi|198137424|gb|EAL26669.2| GA13505 [Drosophila pseudoobscura pseudoobscura]
Unigene14018_All	1186	2e-96	RE15795p [Drosophila melanogaster]
Unigene14018_All	1186	2e-96	CG15117, isoform C [Drosophila melanogaster] >gi|61678356|gb|AAX52695.1| CG15117, isoform C [Drosophila melanogaster]
Unigene14018_All	1186	2e-96	CG15117, isoform A [Drosophila melanogaster] >gi|17861994|gb|AAL39474.1| LD04718p [Drosophila melanogaster] >gi|21626964|gb|AAF57602.2| CG15117, isoform A [Drosophila melanogaster] >gi|220942924|gb|ACL84005.1| CG15117-PA [synthetic construct]
Unigene14018_All	1186	2e-96	CG15117, isoform B [Drosophila melanogaster] >gi|21626965|gb|AAM68434.1| CG15117, isoform B [Drosophila melanogaster]
Unigene14018_All	1186	3e-96	GF11492 [Drosophila ananassae] >gi|190621776|gb|EDV37300.1| GF11492 [Drosophila ananassae]
Unigene14018_All	1186	4e-96	GI20626 [Drosophila mojavensis] >gi|193910802|gb|EDW09669.1| GI20626 [Drosophila mojavensis]
Unigene14018_All	1186	9e-96	GE13860 [Drosophila yakuba] >gi|194177925|gb|EDW91536.1| GE13860 [Drosophila yakuba]
Unigene14020_All	494	7e-10	PREDICTED: similar to Nuclear receptor coactivator 2 (NCoA-2) (Transcriptional intermediary factor 2) [Apis mellifera]
Unigene14020_All	494	4e-09	PREDICTED: similar to transcriptional intermediary factor 2 [Tribolium castaneum]
Unigene14020_All	494	1e-08	salivary gland secretion 1 [Drosophila melanogaster] >gi|55380421|gb|AAF50957.4| salivary gland secretion 1 [Drosophila melanogaster]
Unigene14020_All	494	5e-08	PREDICTED: similar to Nuclear receptor coactivator 2 (NCoA-2) (Transcriptional intermediary factor 2) [Acyrthosiphon pisum]
Unigene14020_All	494	9e-07	GM18501 [Drosophila sechellia] >gi|194132723|gb|EDW54291.1| GM18501 [Drosophila sechellia]
Unigene14020_All	494	3e-06	p160 coactivator FISC [Aedes aegypti]
Unigene14020_All	494	7e-06	U88 [Brugia malayi]
Unigene14022_All	434	2e-69	PREDICTED: similar to LOC100037096 protein [Acyrthosiphon pisum]
Unigene14022_All	434	8e-69	PREDICTED: similar to WD repeat protein 26 [Nasonia vitripennis]
Unigene14022_All	434	3e-66	PREDICTED: similar to WD repeat protein 26 [Tribolium castaneum]
Unigene14022_All	434	2e-62	PREDICTED: similar to CG7611-PA, isoform A [Apis mellifera]
Unigene14022_All	434	6e-61	WD repeat-containing protein 26 [Mus musculus]
Unigene14022_All	434	6e-61	WD repeat domain 26 [Mus musculus]
Unigene14022_All	434	6e-61	PREDICTED: similar to myocardial ischemic preconditioning upregulated protein 2 isoform 1 [Mus musculus]
Unigene14022_All	434	6e-61	Wdr26 protein [Mus musculus]
Unigene14022_All	434	6e-61	Wdr26 protein [Mus musculus]
Unigene14022_All	434	6e-61	PREDICTED: similar to myocardial ischemic preconditioning upregulated protein 2 isoform 2 [Mus musculus] >gi|187952355|gb|AAI39338.1| WD repeat domain 26 [Mus musculus] >gi|187953181|gb|AAI39337.1| WD repeat domain 26 [Mus musculus]
Unigene14022_All	434	8e-61	PREDICTED: WD repeat-containing protein 26-like, partial [Ailuropoda melanoleuca]
Unigene14022_All	434	8e-61	PREDICTED: WD repeat-containing protein 26 [Callithrix jacchus]
Unigene14022_All	434	8e-61	WD repeat-containing protein 26 isoform b [Homo sapiens]
Unigene14022_All	434	8e-61	PREDICTED: similar to WD repeat domain 26 [Taeniopygia guttata]
Unigene14022_All	434	8e-61	WDR26 protein [Homo sapiens]
Unigene14022_All	434	8e-61	PREDICTED: similar to WD repeat-containing protein 26 (CUL4- and DDB1-associated WDR protein 2) (Myocardial ischemic preconditioning up-regulated protein 2) [Equus caballus]
Unigene14022_All	434	8e-61	WD repeat-containing protein 26 isoform a [Homo sapiens] >gi|134047967|sp|Q9H7D7.3|WDR26_HUMAN RecName: Full=WD repeat-containing protein 26; AltName: Full=CUL4- and DDB1-associated WDR protein 2; AltName: Full=Myocardial ischemic preconditioning up-regulated protein 2 >gi|168278016|dbj|BAG10986.1| WD repeat protein 26 [synthetic construct]
Unigene14022_All	434	8e-61	PREDICTED: similar to WD repeat domain 26, [Monodelphis domestica]
Unigene14022_All	434	8e-61	WD repeat domain 26, isoform CRA_e [Homo sapiens]
Unigene14022_All	434	8e-61	WD repeat domain 26, isoform CRA_a [Homo sapiens]
Unigene14023_All	1248	1e-131	PREDICTED: similar to Rs1 CG2173-PA [Apis mellifera]
Unigene14023_All	1248	1e-129	PREDICTED: similar to DEAD box ATP-dependent RNA helicase [Nasonia vitripennis]
Unigene14023_All	1248	1e-128	PREDICTED: similar to Rs1 CG2173-PA [Tribolium castaneum]
Unigene14023_All	1248	1e-124	AGAP011084-PA [Anopheles gambiae str. PEST] >gi|157019713|gb|EAA05253.5| AGAP011084-PA [Anopheles gambiae str. PEST]
Unigene14023_All	1248	1e-123	ATP-dependent RNA helicase DRS1 [Culex quinquefasciatus] >gi|167867695|gb|EDS31078.1| ATP-dependent RNA helicase DRS1 [Culex quinquefasciatus]
Unigene14023_All	1248	1e-123	GI18677 [Drosophila mojavensis] >gi|193911300|gb|EDW10167.1| GI18677 [Drosophila mojavensis]
Unigene14023_All	1248	1e-122	DEAD box ATP-dependent RNA helicase [Aedes aegypti] >gi|108873494|gb|EAT37719.1| DEAD box ATP-dependent RNA helicase [Aedes aegypti]
Unigene14023_All	1248	1e-122	GG23340 [Drosophila erecta] >gi|190662367|gb|EDV59559.1| GG23340 [Drosophila erecta]
Unigene14023_All	1248	1e-122	GD10546 [Drosophila simulans] >gi|194192574|gb|EDX06150.1| GD10546 [Drosophila simulans]
Unigene14023_All	1248	1e-122	GE19181 [Drosophila yakuba] >gi|194175695|gb|EDW89306.1| GE19181 [Drosophila yakuba]
Unigene14023_All	1248	1e-122	GM21012 [Drosophila sechellia] >gi|194124850|gb|EDW46893.1| GM21012 [Drosophila sechellia]
Unigene14023_All	1248	1e-122	Rs1 [Drosophila melanogaster] >gi|7304081|gb|AAF59119.1| Rs1 [Drosophila melanogaster] >gi|28626484|gb|AAO49161.1| LD15481p [Drosophila melanogaster]
Unigene14023_All	1248	1e-121	GA15282 [Drosophila pseudoobscura pseudoobscura] >gi|198135552|gb|EAL24855.2| GA15282 [Drosophila pseudoobscura pseudoobscura]
Unigene14023_All	1248	1e-121	GL11206 [Drosophila persimilis] >gi|194109541|gb|EDW31584.1| GL11206 [Drosophila persimilis]
Unigene14023_All	1248	1e-121	GK15774 [Drosophila willistoni] >gi|194159782|gb|EDW74683.1| GK15774 [Drosophila willistoni]
Unigene14023_All	1248	1e-121	GH21077 [Drosophila grimshawi] >gi|193901916|gb|EDW00783.1| GH21077 [Drosophila grimshawi]
Unigene14023_All	1248	1e-121	GJ21693 [Drosophila virilis] >gi|194144414|gb|EDW60810.1| GJ21693 [Drosophila virilis]
Unigene14023_All	1248	1e-121	GF13667 [Drosophila ananassae] >gi|190622336|gb|EDV37860.1| GF13667 [Drosophila ananassae]
Unigene14023_All	1248	1e-117	BcDNA.GM05306 [Drosophila melanogaster]
Unigene14023_All	1248	1e-113	PREDICTED: similar to ATP-dependent RNA helicase DRS1 [Acyrthosiphon pisum]
Unigene14024_All	1571	5e-13	AGAP002737-PA [Anopheles gambiae str. PEST] >gi|157017970|gb|EAA07771.4| AGAP002737-PA [Anopheles gambiae str. PEST]
Unigene14024_All	1571	8e-13	Hypothetical protein CBG04099 [Caenorhabditis briggsae] >gi|187036279|emb|CAP24885.1| Hypothetical protein CBG04099 [Caenorhabditis briggsae]
Unigene14024_All	1571	4e-12	IQ calmodulin-binding motif domain-containing protein [Toxoplasma gondii ME49] >gi|211962264|gb|EEA97459.1| IQ calmodulin-binding motif domain-containing protein [Toxoplasma gondii ME49]
Unigene14024_All	1571	5e-12	KS1 protein precursor [Entamoeba dispar SAW760]
Unigene14024_All	1571	2e-11	actin B [Entamoeba dispar SAW760]
Unigene14024_All	1571	2e-11	PREDICTED: similar to futsch CG3064-PB [Apis mellifera]
Unigene14024_All	1571	8e-11	PREDICTED: rCG54054-like [Rattus norvegicus]
Unigene14024_All	1571	1e-10	cyclophilin-RNA interacting protein [Brugia malayi]
Unigene14024_All	1571	1e-10	trichohyalin [Trichomonas vaginalis G3]
Unigene14024_All	1571	3e-10	trichohyalin [Entamoeba dispar SAW760]
Unigene14024_All	1571	3e-10	actin [Entamoeba dispar SAW760]
Unigene14024_All	1571	3e-10	IPT/TIG domain containing protein [Trichomonas vaginalis G3] >gi|121910170|gb|EAY15020.1| IPT/TIG domain containing protein [Trichomonas vaginalis G3]
Unigene14024_All	1571	3e-10	mature parasite-infected erythrocyte surface antigen [Plasmodium falciparum]
Unigene14024_All	1571	4e-10	variable membrane protein precursor [Trichomonas vaginalis G3]
Unigene14024_All	1571	4e-10	Hypothetical protein F36H12.3 [Caenorhabditis elegans]
Unigene14024_All	1571	5e-10	Plasmodium exported protein [Plasmodium falciparum 3D7] >gi|254832585|gb|AAN35624.2| Plasmodium exported protein [Plasmodium falciparum 3D7]
Unigene14024_All	1571	5e-10	trichohyalin [Entamoeba histolytica HM-1:IMSS]
Unigene14024_All	1571	5e-10	actin [Entamoeba histolytica HM-1:IMSS]
Unigene14024_All	1571	6e-10	erythrocyte binding protein [Trichomonas vaginalis G3]
Unigene14024_All	1571	8e-10	RecName: Full=Nucleolar protein 58; AltName: Full=Nucleolar protein 5
Unigene14026_All	466	5e-42	PREDICTED: similar to CG7456-PA [Apis mellifera]
Unigene14026_All	466	8e-38	PREDICTED: similar to CG7456 CG7456-PA [Tribolium castaneum]
Unigene14026_All	466	8e-36	PREDICTED: component of oligomeric golgi complex 4-like [Saccoglossus kowalevskii]
Unigene14026_All	466	7e-32	AGAP008875-PA [Anopheles gambiae str. PEST] >gi|157013550|gb|EAL38955.3| AGAP008875-PA [Anopheles gambiae str. PEST]
Unigene14026_All	466	6e-31	conserved oligomeric Golgi complex component 4 [Culex quinquefasciatus] >gi|167879672|gb|EDS43055.1| conserved oligomeric Golgi complex component 4 [Culex quinquefasciatus]
Unigene14026_All	466	1e-30	PREDICTED: similar to component of oligomeric golgi complex 4, [Monodelphis domestica]
Unigene14026_All	466	1e-30	PREDICTED: similar to component of oligomeric golgi complex 4 [Ornithorhynchus anatinus]
Unigene14026_All	466	2e-30	PREDICTED: similar to Conserved oligomeric Golgi complex subunit 4 (COG complex subunit 4) (Component of oligomeric golgi complex 4) [Ciona intestinalis]
Unigene14026_All	466	2e-30	LOC100145689 protein [Xenopus (Silurana) tropicalis]
Unigene14026_All	466	4e-30	conserved oligomeric Golgi complex subunit 4 [Gallus gallus]
Unigene14026_All	466	1e-29	component of oligomeric golgi complex 4, isoform CRA_a [Mus musculus]
Unigene14026_All	466	1e-29	conserved oligomeric Golgi complex subunit 4 [Rattus norvegicus]
Unigene14026_All	466	1e-29	component of oligomeric golgi complex 4 [Mus musculus]
Unigene14026_All	466	1e-29	conserved oligomeric Golgi complex subunit 4 [Mus musculus] >gi|22653690|sp|Q8R1U1.1|COG4_MOUSE RecName: Full=Conserved oligomeric Golgi complex subunit 4; Short=COG complex subunit 4; AltName: Full=Component of oligomeric Golgi complex 4 >gi|18605662|gb|AAH23120.1| Component of oligomeric golgi complex 4 [Mus musculus] >gi|148679527|gb|EDL11474.1| component of oligomeric golgi complex 4, isoform…
Unigene14026_All	466	2e-29	PREDICTED: component of oligomeric golgi complex 4 [Oryctolagus cuniculus]
Unigene14026_All	466	2e-29	PREDICTED: similar to component of oligomeric golgi complex 4 isoform 2 [Equus caballus]
Unigene14026_All	466	2e-29	PREDICTED: similar to component of oligomeric golgi complex 4 isoform 1 [Equus caballus]
Unigene14026_All	466	3e-29	conserved oligomeric Golgi complex subunit 4 [Bos taurus] >gi|122139928|sp|Q3MHG0.1|COG4_BOVIN RecName: Full=Conserved oligomeric Golgi complex subunit 4; Short=COG complex subunit 4; AltName: Full=Component of oligomeric Golgi complex 4 >gi|75948215|gb|AAI05252.1| Component of oligomeric golgi complex 4 [Bos taurus] >gi|296478246|gb|DAA20361.1| conserved oligomeric Golgi complex subunit 4 [Bos t…
Unigene14026_All	466	5e-29	PREDICTED: LOW QUALITY PROTEIN: conserved oligomeric Golgi complex subunit 4-like [Macaca mulatta]
Unigene14026_All	466	5e-29	PREDICTED: conserved oligomeric Golgi complex subunit 4-like [Ailuropoda melanoleuca]
Unigene14027_All	685	9e-50	PREDICTED: similar to CG6327-PA, isoform A [Apis mellifera]
Unigene14027_All	685	2e-49	PREDICTED: similar to AGAP009897-PA [Tribolium castaneum]
Unigene14027_All	685	4e-49	amino acid transporter [Aedes aegypti] >gi|108876914|gb|EAT41139.1| amino acid transporter [Aedes aegypti]
Unigene14027_All	685	5e-49	PREDICTED: similar to proton-coupled amino acid transporter 1 [Acyrthosiphon pisum]
Unigene14027_All	685	6e-49	AGAP008490-PA [Anopheles gambiae str. PEST] >gi|157014771|gb|EAA12852.4| AGAP008490-PA [Anopheles gambiae str. PEST]
Unigene14027_All	685	8e-49	AGAP009897-PA [Anopheles gambiae str. PEST] >gi|157014094|gb|EAA14383.5| AGAP009897-PA [Anopheles gambiae str. PEST]
Unigene14027_All	685	1e-48	PREDICTED: similar to amino acid transporter [Nasonia vitripennis]
Unigene14027_All	685	5e-48	GK12679 [Drosophila willistoni] >gi|194163959|gb|EDW78860.1| GK12679 [Drosophila willistoni]
Unigene14027_All	685	7e-48	proton-coupled amino acid transporter 1 [Culex quinquefasciatus] >gi|167875932|gb|EDS39315.1| proton-coupled amino acid transporter 1 [Culex quinquefasciatus]
Unigene14027_All	685	2e-47	amino acid transporter [Aedes aegypti] >gi|108882419|gb|EAT46644.1| amino acid transporter [Aedes aegypti]
Unigene14027_All	685	2e-47	amino acid transporter [Aedes aegypti] >gi|108882418|gb|EAT46643.1| amino acid transporter [Aedes aegypti]
Unigene14027_All	685	3e-47	GD12836 [Drosophila simulans] >gi|194196441|gb|EDX10017.1| GD12836 [Drosophila simulans]
Unigene14027_All	685	4e-47	GF23811 [Drosophila ananassae] >gi|190625142|gb|EDV40666.1| GF23811 [Drosophila ananassae]
Unigene14027_All	685	4e-47	proton-coupled amino acid transporter 1 [Culex quinquefasciatus] >gi|167872286|gb|EDS35669.1| proton-coupled amino acid transporter 1 [Culex quinquefasciatus]
Unigene14027_All	685	5e-47	GE20249 [Drosophila yakuba] >gi|194180451|gb|EDW94062.1| GE20249 [Drosophila yakuba]
Unigene14027_All	685	1e-46	GG13950 [Drosophila erecta] >gi|190654109|gb|EDV51352.1| GG13950 [Drosophila erecta]
Unigene14027_All	685	1e-46	GI13867 [Drosophila mojavensis] >gi|193920719|gb|EDW19586.1| GI13867 [Drosophila mojavensis]
Unigene14027_All	685	2e-46	GJ11728 [Drosophila virilis] >gi|194154957|gb|EDW70141.1| GJ11728 [Drosophila virilis]
Unigene14027_All	685	3e-46	RH52922p [Drosophila melanogaster]
Unigene14027_All	685	3e-46	GM01221p [Drosophila melanogaster]
Unigene14028_All	606	2e-07	gustatory receptor [Tribolium castaneum]
Unigene14028_All	606	2e-07	conserved Plasmodium membrane protein [Plasmodium falciparum 3D7] >gi|23496069|gb|AAN35730.1| conserved Plasmodium membrane protein [Plasmodium falciparum 3D7]
Unigene14028_All	606	2e-07	ATP synthase a chain [Entamoeba dispar SAW760]
Unigene14028_All	606	5e-07	GM16758 [Drosophila sechellia] >gi|194123384|gb|EDW45427.1| GM16758 [Drosophila sechellia]
Unigene14028_All	606	2e-06	NADH dehydrogenase subunit 5 [Strongyloides stercoralis]
Unigene14028_All	606	2e-06	GD23040 [Drosophila simulans] >gi|194189676|gb|EDX03252.1| GD23040 [Drosophila simulans]
Unigene14028_All	606	2e-06	GE16990 [Drosophila yakuba] >gi|194173558|gb|EDW87169.1| GE16990 [Drosophila yakuba]
Unigene14028_All	606	2e-06	CG2839 [Drosophila melanogaster] >gi|22945532|gb|AAF51469.2| CG2839 [Drosophila melanogaster]
Unigene14028_All	606	6e-06	pugilistDominant [Culex quinquefasciatus] >gi|167872266|gb|EDS35649.1| pugilistDominant [Culex quinquefasciatus]
Unigene14028_All	606	8e-06	NADH dehydrogenase subunit 4 [Paraplea frontalis] >gi|215789112|gb|ACJ69568.1| NADH dehydrogenase subunit 4 [Paraplea frontalis]
Unigene14028_All	606	8e-06	Hypothetical protein CBG17156 [Caenorhabditis briggsae] >gi|187025967|emb|CAP34960.1| Hypothetical protein CBG17156 [Caenorhabditis briggsae]
Unigene14029_All	938	3e-08	GF18460 [Drosophila ananassae] >gi|190627856|gb|EDV43380.1| GF18460 [Drosophila ananassae]
Unigene14029_All	938	4e-07	GA21184 [Drosophila pseudoobscura pseudoobscura] >gi|198149728|gb|EAL30731.2| GA21184 [Drosophila pseudoobscura pseudoobscura]
Unigene14029_All	938	4e-07	GL24331 [Drosophila persimilis] >gi|194104280|gb|EDW26323.1| GL24331 [Drosophila persimilis]
Unigene14029_All	938	9e-07	GF24280 [Drosophila ananassae] >gi|190624285|gb|EDV39809.1| GF24280 [Drosophila ananassae]
Unigene14029_All	938	5e-06	pst [Drosophila yakuba] >gi|194180134|gb|EDW93745.1| pst [Drosophila yakuba]
Unigene14029_All	938	6e-06	GJ12811 [Drosophila virilis] >gi|194153438|gb|EDW68622.1| GJ12811 [Drosophila virilis]
Unigene14030_All	663	3e-34	PREDICTED: similar to ENSANGP00000009906 [Nasonia vitripennis]
Unigene14030_All	663	5e-34	PREDICTED: similar to prefoldin subunit 4 [Apis mellifera]
Unigene14030_All	663	5e-33	ACYPI007432 [Acyrthosiphon pisum]
Unigene14030_All	663	1e-29	AGAP006946-PA [Anopheles gambiae str. PEST] >gi|116132513|gb|EAA04281.3| AGAP006946-PA [Anopheles gambiae str. PEST]
Unigene14030_All	663	2e-29	prefoldin [Culex quinquefasciatus] >gi|167872115|gb|EDS35498.1| prefoldin [Culex quinquefasciatus]
Unigene14030_All	663	2e-28	PREDICTED: similar to prefoldin subunit 4 [Gallus gallus]
Unigene14030_All	663	3e-28	FI07764p [Drosophila melanogaster]
Unigene14030_All	663	3e-28	SD11994p [Drosophila melanogaster]
Unigene14030_All	663	3e-28	CG10635 [Drosophila melanogaster] >gi|12230496|sp|Q9VRL3.1|PFD4_DROME RecName: Full=Probable prefoldin subunit 4 >gi|7295467|gb|AAF50782.1| CG10635 [Drosophila melanogaster]
Unigene14030_All	663	4e-28	LOC572231 protein [Danio rerio]
Unigene14030_All	663	5e-28	Prefoldin subunit 4 [Anoplopoma fimbria]
Unigene14030_All	663	1e-27	GM13921 [Drosophila sechellia] >gi|194128530|gb|EDW50573.1| GM13921 [Drosophila sechellia]
Unigene14030_All	663	3e-27	PREDICTED: prefoldin subunit 4-like [Saccoglossus kowalevskii]
Unigene14030_All	663	3e-27	Prefoldin subunit 4 [Anoplopoma fimbria]
Unigene14030_All	663	3e-27	Prefoldin subunit 4 [Esox lucius]
Unigene14030_All	663	3e-27	Prefoldin subunit 4 [Esox lucius]
Unigene14030_All	663	4e-27	PREDICTED: similar to prefoldin subunit 4 [Ornithorhynchus anatinus]
Unigene14030_All	663	7e-27	Prefoldin subunit 4 [Oncorhynchus mykiss] >gi|225703894|gb|ACO07793.1| Prefoldin subunit 4 [Oncorhynchus mykiss]
Unigene14030_All	663	7e-27	GE20563 [Drosophila yakuba] >gi|194179890|gb|EDW93501.1| GE20563 [Drosophila yakuba]
Unigene14030_All	663	1e-26	PREDICTED: prefoldin subunit 4-like [Pongo abelii]
Unigene14031_All	557	5e-11	GF20993 [Drosophila ananassae] >gi|190618866|gb|EDV34390.1| GF20993 [Drosophila ananassae]
Unigene14031_All	557	1e-10	lethal (1) G0193, isoform A [Drosophila melanogaster] >gi|7290859|gb|AAF46301.1| lethal (1) G0193, isoform A [Drosophila melanogaster] >gi|16197997|gb|AAL13770.1| LD24308p [Drosophila melanogaster] >gi|220944856|gb|ACL84971.1| l(1)G0193-PA [synthetic construct]
Unigene14031_All	557	2e-10	GM11959 [Drosophila sechellia] >gi|194131635|gb|EDW53677.1| GM11959 [Drosophila sechellia]
Unigene14031_All	557	3e-10	GE17494 [Drosophila yakuba] >gi|194188734|gb|EDX02318.1| GE17494 [Drosophila yakuba]
Unigene14031_All	557	3e-10	GG17594 [Drosophila erecta] >gi|190650242|gb|EDV47520.1| GG17594 [Drosophila erecta]
Unigene14031_All	557	4e-10	GI21656 [Drosophila mojavensis] >gi|193907432|gb|EDW06299.1| GI21656 [Drosophila mojavensis]
Unigene14031_All	557	5e-10	GH24541 [Drosophila grimshawi] >gi|193892869|gb|EDV91735.1| GH24541 [Drosophila grimshawi]
Unigene14031_All	557	2e-09	GA15301 [Drosophila pseudoobscura pseudoobscura] >gi|198145511|gb|EAL32401.2| GA15301 [Drosophila pseudoobscura pseudoobscura]
Unigene14031_All	557	2e-09	GL15246 [Drosophila persimilis] >gi|194109008|gb|EDW31051.1| GL15246 [Drosophila persimilis]
Unigene14031_All	557	3e-09	GK16218 [Drosophila willistoni] >gi|194163455|gb|EDW78356.1| GK16218 [Drosophila willistoni]
Unigene14031_All	557	5e-09	GJ16894 [Drosophila virilis] >gi|194146861|gb|EDW62580.1| GJ16894 [Drosophila virilis]
Unigene14031_All	557	7e-07	GK19560 [Drosophila willistoni] >gi|194158768|gb|EDW73669.1| GK19560 [Drosophila willistoni]
Unigene14032_All	803	3e-44	ACYPI009426 [Acyrthosiphon pisum]
Unigene14032_All	803	4e-41	AGAP011301-PA [Anopheles gambiae str. PEST] >gi|157019576|gb|EDO64459.1| AGAP011301-PA [Anopheles gambiae str. PEST]
Unigene14032_All	803	5e-37	GF24521 [Drosophila ananassae] >gi|190623860|gb|EDV39384.1| GF24521 [Drosophila ananassae]
Unigene14032_All	803	1e-36	GG13894 [Drosophila erecta] >gi|190654210|gb|EDV51453.1| GG13894 [Drosophila erecta]
Unigene14032_All	803	3e-36	GK12396 [Drosophila willistoni] >gi|194164188|gb|EDW79089.1| GK12396 [Drosophila willistoni]
Unigene14032_All	803	4e-36	GM24719 [Drosophila sechellia] >gi|194119103|gb|EDW41146.1| GM24719 [Drosophila sechellia]
Unigene14032_All	803	6e-36	GE20185 [Drosophila yakuba] >gi|194180570|gb|EDW94181.1| GE20185 [Drosophila yakuba]
Unigene14032_All	803	6e-36	kunitz-like protein [Ornithodoros parkeri]
Unigene14032_All	803	7e-36	GJ11259 [Drosophila virilis] >gi|194155772|gb|EDW70956.1| GJ11259 [Drosophila virilis]
Unigene14032_All	803	7e-36	CG6038 [Drosophila melanogaster] >gi|7294684|gb|AAF50021.1| CG6038 [Drosophila melanogaster] >gi|16768194|gb|AAL28316.1| GH23035p [Drosophila melanogaster] >gi|220944216|gb|ACL84651.1| CG6038-PA [synthetic construct] >gi|220954070|gb|ACL89578.1| CG6038-PA [synthetic construct]
Unigene14032_All	803	1e-35	GD12781 [Drosophila simulans] >gi|194196544|gb|EDX10120.1| GD12781 [Drosophila simulans]
Unigene14032_All	803	2e-35	GA19312 [Drosophila pseudoobscura pseudoobscura] >gi|198150442|gb|EAL29628.2| GA19312 [Drosophila pseudoobscura pseudoobscura]
Unigene14032_All	803	2e-35	GL16339 [Drosophila persimilis] >gi|194115523|gb|EDW37566.1| GL16339 [Drosophila persimilis]
Unigene14032_All	803	2e-35	GI11580 [Drosophila mojavensis] >gi|193920467|gb|EDW19334.1| GI11580 [Drosophila mojavensis]
Unigene14032_All	803	8e-35	GH16386 [Drosophila grimshawi] >gi|193897806|gb|EDV96672.1| GH16386 [Drosophila grimshawi]
Unigene14033_All	608	4e-32	PREDICTED: similar to Mannose-P-dolichol utilization defect 1 protein homolog [Acyrthosiphon pisum]
Unigene14033_All	608	5e-31	GK24464 [Drosophila willistoni] >gi|194162718|gb|EDW77619.1| GK24464 [Drosophila willistoni]
Unigene14033_All	608	7e-31	PREDICTED: similar to Mannose-P-dolichol utilization defect 1 protein homolog [Tribolium castaneum]
Unigene14033_All	608	7e-31	PREDICTED: similar to Mannose-P-dolichol utilization defect 1 protein homolog [Apis mellifera]
Unigene14033_All	608	9e-31	PREDICTED: similar to mannose-P-dolichol utilization defect 1b, partial [Ciona intestinalis]
Unigene14033_All	608	6e-30	AGAP008375-PA [Anopheles gambiae str. PEST] >gi|116122977|gb|EAA12192.3| AGAP008375-PA [Anopheles gambiae str. PEST]
Unigene14033_All	608	6e-30	GA17688 [Drosophila pseudoobscura pseudoobscura] >gi|54644267|gb|EAL33008.1| GA17688 [Drosophila pseudoobscura pseudoobscura]
Unigene14033_All	608	8e-30	GL26539 [Drosophila persimilis] >gi|194103291|gb|EDW25334.1| GL26539 [Drosophila persimilis]
Unigene14033_All	608	8e-30	GI21484 [Drosophila mojavensis] >gi|193914274|gb|EDW13141.1| GI21484 [Drosophila mojavensis]
Unigene14033_All	608	3e-29	mannose-P-dolichol utilization defect 1 protein [Danio rerio] >gi|47937968|gb|AAH71434.1| Mannose-P-dolichol utilization defect 1b [Danio rerio]
Unigene14033_All	608	5e-29	GF15707 [Drosophila ananassae] >gi|190616671|gb|EDV32195.1| GF15707 [Drosophila ananassae]
Unigene14033_All	608	5e-29	mannose-P-dolichol utilization defect 1 protein [Culex quinquefasciatus] >gi|167870171|gb|EDS33554.1| mannose-P-dolichol utilization defect 1 protein [Culex quinquefasciatus]
Unigene14033_All	608	1e-28	GD23315 [Drosophila simulans] >gi|194190201|gb|EDX03777.1| GD23315 [Drosophila simulans]
Unigene14033_All	608	1e-28	GE11282 [Drosophila yakuba] >gi|194174797|gb|EDW88408.1| GE11282 [Drosophila yakuba]
Unigene14033_All	608	1e-28	GM18511 [Drosophila sechellia] >gi|194132741|gb|EDW54309.1| GM18511 [Drosophila sechellia]
Unigene14033_All	608	1e-28	GJ17483 [Drosophila virilis] >gi|194148763|gb|EDW64461.1| GJ17483 [Drosophila virilis]
Unigene14033_All	608	3e-28	mannose-P-dolichol utilization defect 1 protein [Bombyx mori] >gi|87248405|gb|ABD36255.1| suppressor of Lec15 glycosylation mutation-like protein [Bombyx mori]
Unigene14033_All	608	7e-28	GG25037 [Drosophila erecta] >gi|190660612|gb|EDV57804.1| GG25037 [Drosophila erecta]
Unigene14033_All	608	7e-28	CG3792 [Drosophila melanogaster] >gi|12229871|sp|Q9VMW8.2|MPU1_DROME RecName: Full=Mannose-P-dolichol utilization defect 1 protein homolog >gi|10728573|gb|AAF52190.2| CG3792 [Drosophila melanogaster] >gi|28557601|gb|AAO45206.1| RE68138p [Drosophila melanogaster] >gi|220949010|gb|ACL87048.1| CG3792-PA [synthetic construct] >gi|220958184|gb|ACL91635.1| CG3792-PA [synthetic construct]
Unigene14033_All	608	2e-27	mannose-P-dolichol utilization defect 1 protein [Bos taurus] >gi|109939928|gb|AAI18439.1| Mannose-P-dolichol utilization defect 1 [Bos taurus] >gi|296476705|gb|DAA18820.1| mannose-P-dolichol utilization defect 1 [Bos taurus]
Unigene14034_All	683	5e-31	neuropeptide receptor A21 [Bombyx mori] >gi|195947012|dbj|BAG68420.1| neuropeptide receptor A21 [Bombyx mori]
Unigene14034_All	683	2e-30	corazonin receptor [Manduca sexta]
Unigene14034_All	683	4e-30	GJ12227 [Drosophila virilis] >gi|194154073|gb|EDW69257.1| GJ12227 [Drosophila virilis]
Unigene14034_All	683	4e-30	GL24963 [Drosophila persimilis] >gi|194118278|gb|EDW40321.1| GL24963 [Drosophila persimilis]
Unigene14034_All	683	4e-30	GI12336 [Drosophila mojavensis] >gi|193919146|gb|EDW18013.1| GI12336 [Drosophila mojavensis]
Unigene14034_All	683	4e-30	GA10504 [Drosophila pseudoobscura pseudoobscura] >gi|54642145|gb|EAL30894.1| GA10504 [Drosophila pseudoobscura pseudoobscura]
Unigene14034_All	683	6e-30	GK12785 [Drosophila willistoni] >gi|194164293|gb|EDW79194.1| GK12785 [Drosophila willistoni]
Unigene14034_All	683	6e-30	GH16073 [Drosophila grimshawi] >gi|193897240|gb|EDV96106.1| GH16073 [Drosophila grimshawi]
Unigene14034_All	683	8e-30	corazonin receptor [Apis mellifera] >gi|62462050|gb|AAX83120.1| corazonin receptor [Apis mellifera]
Unigene14034_All	683	2e-29	GF24986 [Drosophila ananassae] >gi|190623283|gb|EDV38807.1| GF24986 [Drosophila ananassae]
Unigene14034_All	683	3e-29	GM24664 [Drosophila sechellia] >gi|194119206|gb|EDW41249.1| GM24664 [Drosophila sechellia]
Unigene14034_All	683	4e-29	GD12727 [Drosophila simulans] >gi|194196647|gb|EDX10223.1| GD12727 [Drosophila simulans]
Unigene14034_All	683	4e-29	GE20128 [Drosophila yakuba] >gi|194180676|gb|EDW94287.1| GE20128 [Drosophila yakuba]
Unigene14034_All	683	4e-29	GG13838 [Drosophila erecta] >gi|190654308|gb|EDV51551.1| GG13838 [Drosophila erecta]
Unigene14034_All	683	4e-29	GRHRII [Drosophila melanogaster] >gi|17945972|gb|AAL49030.1| RE49422p [Drosophila melanogaster] >gi|23093602|gb|AAF49928.2| GRHRII [Drosophila melanogaster] >gi|220948872|gb|ACL86979.1| GRHRII-PA [synthetic construct]
Unigene14034_All	683	4e-29	Drm corazonin receptor [Drosophila melanogaster]
Unigene14034_All	683	3e-28	G-protein coupled receptor [Anopheles gambiae]
Unigene14034_All	683	3e-28	AGAP001558-PA [Anopheles gambiae str. PEST] >gi|30173795|gb|EAA01361.2| AGAP001558-PA [Anopheles gambiae str. PEST]
Unigene14034_All	683	5e-28	corazonin receptor [Aedes aegypti] >gi|108872220|gb|EAT36445.1| corazonin receptor [Aedes aegypti]
Unigene14034_All	683	8e-27	corazonin receptor [Culex quinquefasciatus] >gi|167880759|gb|EDS44142.1| corazonin receptor [Culex quinquefasciatus]
Unigene14035_All	1834	2e-28	AGAP002737-PA [Anopheles gambiae str. PEST] >gi|157017970|gb|EAA07771.4| AGAP002737-PA [Anopheles gambiae str. PEST]
Unigene14035_All	1834	5e-27	large low complexity coiled coil protien with large repeat region [Cryptosporidium parvum Iowa II]
Unigene14035_All	1834	1e-24	Hypothetical protein Y55B1BR.3 [Caenorhabditis elegans]
Unigene14035_All	1834	2e-23	AGAP010846-PA [Anopheles gambiae str. PEST] >gi|157019456|gb|EAL41487.3| AGAP010846-PA [Anopheles gambiae str. PEST]
Unigene14035_All	1834	4e-23	LOC402866 protein [Danio rerio]
Unigene14035_All	1834	2e-22	PREDICTED: rCG54054-like [Rattus norvegicus]
Unigene14035_All	1834	2e-22	trichohyalin [Trichomonas vaginalis G3]
Unigene14035_All	1834	5e-22	trichohyalin [Trichomonas vaginalis G3]
Unigene14035_All	1834	5e-22	human XNP gene related family member (xnp-1) [Caenorhabditis elegans] >gi|3253105|gb|AAC24256.1| Human xnp gene related protein 1 [Caenorhabditis elegans]
Unigene14035_All	1834	5e-22	RecName: Full=Transcriptional regulator ATRX homolog; AltName: Full=ATP-dependent helicase xnp-1; AltName: Full=X-linked nuclear protein 1 >gi|5901659|gb|AAD55361.1|AF134186_1 XNP-1 [Caenorhabditis elegans]
Unigene14035_All	1834	7e-22	dentin sialophosphoprotein [Sus scrofa]
Unigene14035_All	1834	2e-21	PREDICTED: similar to cylicin [Equus caballus]
Unigene14035_All	1834	2e-21	Hypothetical protein CBG09244 [Caenorhabditis briggsae] >gi|187032007|emb|CAP29307.1| Hypothetical protein CBG09244 [Caenorhabditis briggsae]
Unigene14035_All	1834	3e-21	smooth muscle caldesmon [Trichomonas vaginalis G3]
Unigene14035_All	1834	6e-21	dentin sialophosphoprotein [Sus scrofa]
Unigene14035_All	1834	6e-21	erythrocyte binding protein [Trichomonas vaginalis G3]
Unigene14035_All	1834	6e-21	conserved Plasmodium protein [Plasmodium falciparum 3D7] >gi|3845099|gb|AAC71813.1| conserved Plasmodium protein [Plasmodium falciparum 3D7]
Unigene14035_All	1834	1e-20	myosin heavy chain [Cryptosporidium hominis TU502] >gi|54657105|gb|EAL35936.1| myosin heavy chain [Cryptosporidium hominis]
Unigene14035_All	1834	2e-20	PREDICTED: similar to Eukaryotic translation initiation factor 5B [Hydra magnipapillata]
Unigene14035_All	1834	2e-20	chromosome scaffold protein p85 [Moneuplotes crassus]
Unigene14037_All	448	3e-17	PREDICTED: similar to P-element somatic inhibitor CG8912-PB, isoform B [Apis mellifera]
Unigene14037_All	448	8e-16	PREDICTED: similar to P-element somatic inhibitor [Acyrthosiphon pisum]
Unigene14037_All	448	6e-12	PREDICTED: similar to P-element somatic inhibitor [Tribolium castaneum]
Unigene14037_All	448	8e-11	PREDICTED: similar to CG8912-PC [Nasonia vitripennis]
Unigene14037_All	448	8e-08	AGAP011446-PA [Anopheles gambiae str. PEST] >gi|157014686|gb|EAA13030.4| AGAP011446-PA [Anopheles gambiae str. PEST]
Unigene14037_All	448	7e-07	far upstream element (FUSE) binding protein 1 [Xenopus laevis] >gi|28278093|gb|AAH44277.1| Fubp1 protein [Xenopus laevis]
Unigene14037_All	448	1e-06	far upstream (fuse) binding protein [Aedes aegypti] >gi|108877073|gb|EAT41298.1| far upstream (fuse) binding protein [Aedes aegypti]
Unigene14037_All	448	1e-06	far upstream (fuse) binding protein [Aedes aegypti] >gi|157115061|ref|XP_001652541.1| far upstream (fuse) binding protein [Aedes aegypti] >gi|108877074|gb|EAT41299.1| far upstream (fuse) binding protein [Aedes aegypti] >gi|108877075|gb|EAT41300.1| far upstream (fuse) binding protein [Aedes aegypti]
Unigene14037_All	448	1e-06	MGC78835 protein [Xenopus laevis] >gi|213626654|gb|AAI69815.1| Hypothetical protein MGC78835 [Xenopus laevis]
Unigene14037_All	448	1e-06	far upstream element (FUSE) binding protein 1 [Xenopus laevis] >gi|25992563|gb|AAN77161.1| FUSE binding protein-like protein [Xenopus laevis]
Unigene14037_All	448	1e-06	P-element somatic inhibitor, isoform C [Drosophila melanogaster] >gi|45445514|gb|AAS64831.1| P-element somatic inhibitor, isoform C [Drosophila melanogaster]
Unigene14037_All	448	1e-06	P-element somatic inhibitor, isoform B [Drosophila melanogaster] >gi|994900|gb|AAB50636.1| PSI [Drosophila sp.] >gi|21645257|gb|AAF57942.2| P-element somatic inhibitor, isoform B [Drosophila melanogaster] >gi|162944872|gb|ABY20505.1| LD35640p [Drosophila melanogaster]
Unigene14037_All	448	2e-06	far upstream element (FUSE) binding protein 1 [Xenopus (Silurana) tropicalis] >gi|39794540|gb|AAH63902.1| far upstream element (FUSE) binding protein 1 [Xenopus (Silurana) tropicalis]
Unigene14037_All	448	2e-06	fubp1 [Xenopus tropicalis]
Unigene14037_All	448	2e-06	PREDICTED: far upstream element-binding protein 1-like [Ailuropoda melanoleuca]
Unigene14037_All	448	2e-06	PREDICTED: far upstream element-binding protein 1 [Pongo abelii]
Unigene14037_All	448	2e-06	far upstream element-binding protein [Bos taurus]
Unigene14037_All	448	2e-06	PREDICTED: far upstream element (FUSE) binding protein 1 [Equus caballus]
Unigene14037_All	448	2e-06	GK21314 [Drosophila willistoni] >gi|194159724|gb|EDW74625.1| GK21314 [Drosophila willistoni]
Unigene14037_All	448	2e-06	far upstream element (FUSE) binding protein 1, isoform CRA_b [Rattus norvegicus] >gi|149026248|gb|EDL82491.1| far upstream element (FUSE) binding protein 1, isoform CRA_b [Rattus norvegicus]
Unigene14038_All	824	1e-110	PREDICTED: similar to serine/threonine protein kinase TAO1 [Apis mellifera]
Unigene14038_All	824	1e-109	PREDICTED: similar to serine/threonine protein kinase [Nasonia vitripennis]
Unigene14038_All	824	1e-103	serine/threonine protein kinase [Aedes aegypti] >gi|108884560|gb|EAT48785.1| serine/threonine protein kinase [Aedes aegypti]
Unigene14038_All	824	1e-103	PREDICTED: similar to serine/threonine protein kinase TAO1 [Acyrthosiphon pisum]
Unigene14038_All	824	1e-103	AGAP003201-PA [Anopheles gambiae str. PEST] >gi|157017753|gb|EAA44791.4| AGAP003201-PA [Anopheles gambiae str. PEST]
Unigene14038_All	824	1e-102	GJ16968 [Drosophila virilis] >gi|194146977|gb|EDW62696.1| GJ16968 [Drosophila virilis]
Unigene14038_All	824	1e-102	GH12443 [Drosophila grimshawi] >gi|193900764|gb|EDV99630.1| GH12443 [Drosophila grimshawi]
Unigene14038_All	824	1e-101	GK10058 [Drosophila willistoni] >gi|194167661|gb|EDW82562.1| GK10058 [Drosophila willistoni]
Unigene14038_All	824	1e-101	GI21796 [Drosophila mojavensis] >gi|193907683|gb|EDW06550.1| GI21796 [Drosophila mojavensis]
Unigene14038_All	824	1e-101	serine/threonine-protein kinase TAO1 [Culex quinquefasciatus] >gi|167876104|gb|EDS39487.1| serine/threonine-protein kinase TAO1 [Culex quinquefasciatus]
Unigene14038_All	824	1e-101	serine/threonine-protein kinase TAO1 [Culex quinquefasciatus] >gi|167866906|gb|EDS30289.1| serine/threonine-protein kinase TAO1 [Culex quinquefasciatus]
Unigene14038_All	824	1e-100	GL14776 [Drosophila persimilis] >gi|194104851|gb|EDW26894.1| GL14776 [Drosophila persimilis]
Unigene14038_All	824	1e-100	GA12831 [Drosophila pseudoobscura pseudoobscura] >gi|54643528|gb|EAL32272.1| GA12831 [Drosophila pseudoobscura pseudoobscura]
Unigene14038_All	824	1e-99	Tao-1, isoform D [Drosophila melanogaster] >gi|24643296|ref|NP_728268.1| Tao-1, isoform E [Drosophila melanogaster] >gi|7293601|gb|AAF48973.1| Tao-1, isoform E [Drosophila melanogaster] >gi|22832584|gb|AAN09504.1| Tao-1, isoform D [Drosophila melanogaster] >gi|139000842|dbj|BAF51959.1| serine/threonine protein kinase TAO1 alpha [Drosophila melanogaster] >gi|257286273|gb|ACV53083.1| LD06119p [Dros…
Unigene14038_All	824	2e-99	GF20482 [Drosophila ananassae] >gi|190629266|gb|EDV44683.1| GF20482 [Drosophila ananassae]
Unigene14038_All	824	5e-96	GG18048 [Drosophila erecta] >gi|190649434|gb|EDV46712.1| GG18048 [Drosophila erecta]
Unigene14038_All	824	2e-86	GE17379 [Drosophila yakuba] >gi|194188541|gb|EDX02125.1| GE17379 [Drosophila yakuba]
Unigene14038_All	824	2e-86	Tao-1, isoform A [Drosophila melanogaster] >gi|17862274|gb|AAL39614.1| LD21241p [Drosophila melanogaster] >gi|22832585|gb|AAN09505.1| Tao-1, isoform A [Drosophila melanogaster] >gi|139000847|dbj|BAF51960.1| serine/threonine protein kinase TAO1 beta [Drosophila melanogaster] >gi|220944808|gb|ACL84947.1| Tao-1-PA [synthetic construct] >gi|220954588|gb|ACL89837.1| Tao-1-PA [synthetic construct]
Unigene14038_All	824	2e-85	Tao-1, isoform B [Drosophila melanogaster] >gi|22832586|gb|AAN09506.1| Tao-1, isoform B [Drosophila melanogaster]
Unigene14038_All	824	1e-68	PREDICTED: similar to serine/threonine protein kinase [Tribolium castaneum]
Unigene14040_All	522	7e-88	PREDICTED: similar to cactin CG1676-PA [Tribolium castaneum]
Unigene14040_All	522	2e-86	PREDICTED: similar to cactin CG1676-PA isoform 2 [Apis mellifera]
Unigene14040_All	522	2e-84	PREDICTED: similar to chromosome 19 open reading frame 29 [Acyrthosiphon pisum]
Unigene14040_All	522	3e-83	cactin [Culex quinquefasciatus] >gi|167875279|gb|EDS38662.1| cactin [Culex quinquefasciatus]
Unigene14040_All	522	2e-82	AGAP006542-PA [Anopheles gambiae str. PEST] >gi|157016314|gb|EAA10971.4| AGAP006542-PA [Anopheles gambiae str. PEST]
Unigene14040_All	522	6e-80	GL15935 [Drosophila persimilis] >gi|194107952|gb|EDW29995.1| GL15935 [Drosophila persimilis]
Unigene14040_All	522	1e-79	GA25716 [Drosophila pseudoobscura pseudoobscura] >gi|198146881|gb|EDY72940.1| GA25716 [Drosophila pseudoobscura pseudoobscura]
Unigene14040_All	522	2e-79	GF19092 [Drosophila ananassae] >gi|190618313|gb|EDV33837.1| GF19092 [Drosophila ananassae]
Unigene14040_All	522	4e-79	GH17778 [Drosophila grimshawi] >gi|193896281|gb|EDV95147.1| GH17778 [Drosophila grimshawi]
Unigene14040_All	522	3e-78	GI15124 [Drosophila mojavensis] >gi|193908100|gb|EDW06967.1| GI15124 [Drosophila mojavensis]
Unigene14040_All	522	4e-78	GJ18982 [Drosophila virilis] >gi|194149612|gb|EDW65303.1| GJ18982 [Drosophila virilis]
Unigene14040_All	522	5e-78	GK25491 [Drosophila willistoni] >gi|194166971|gb|EDW81872.1| GK25491 [Drosophila willistoni]
Unigene14040_All	522	7e-78	GE17882 [Drosophila yakuba] >gi|194189429|gb|EDX03013.1| GE17882 [Drosophila yakuba]
Unigene14040_All	522	7e-78	GG19290 [Drosophila erecta] >gi|190649538|gb|EDV46816.1| GG19290 [Drosophila erecta]
Unigene14040_All	522	1e-77	PREDICTED: similar to hCG23632, [Monodelphis domestica]
Unigene14040_All	522	2e-77	GM23033 [Drosophila sechellia] >gi|194134772|gb|EDW56288.1| GM23033 [Drosophila sechellia]
Unigene14040_All	522	2e-77	cactin [Drosophila melanogaster] >gi|45447076|gb|AAF50904.2| cactin [Drosophila melanogaster]
Unigene14040_All	522	2e-77	PREDICTED: similar to C19orf29 protein, partial [Gallus gallus]
Unigene14040_All	522	2e-77	PREDICTED: similar to CG1676-PA [Canis familiaris]
Unigene14040_All	522	4e-77	hCG23632, isoform CRA_a [Homo sapiens]
Unigene14041_All	710	7e-42	PREDICTED: similar to extradenticle CG8933-PA [Acyrthosiphon pisum]
Unigene14041_All	710	4e-29	extradenticle [Tribolium castaneum] >gi|38490515|emb|CAD57734.1| extradenticle [Tribolium castaneum]
Unigene14041_All	710	1e-28	AGAP004696-PA [Anopheles gambiae str. PEST] >gi|190359338|sp|Q7PMT1.2|EXD_ANOGA RecName: Full=Homeobox protein extradenticle >gi|157014624|gb|EAA13242.3| AGAP004696-PA [Anopheles gambiae str. PEST]
Unigene14041_All	710	2e-28	extradenticle 2 [Cupiennius salei]
Unigene14041_All	710	5e-27	extradenticle 1 [Cupiennius salei]
Unigene14041_All	710	8e-27	pre-B-cell leukemia homeobox 1 [Danio rerio] >gi|125858079|gb|AAI29474.1| Zgc:158824 protein [Danio rerio]
Unigene14041_All	710	8e-27	pre-B-cell leukemia transcription factor 1a isoform 2 [Danio rerio] >gi|7160794|emb|CAB76455.1| Pbx1b homeodomain protein [Danio rerio]
Unigene14041_All	710	8e-27	pre-B-cell leukemia transcription factor 1a isoform 1 [Danio rerio] >gi|7160792|emb|CAB76454.1| Pbx1a homeodomain protein [Danio rerio] >gi|42542444|gb|AAH66446.1| Pre-B-cell leukemia transcription factor 1a [Danio rerio]
Unigene14041_All	710	2e-26	PREDICTED: pre-B-cell leukemia homeobox 1 [Equus caballus]
Unigene14041_All	710	2e-26	pre-B-cell leukemia transcription factor 1d [Mus musculus]
Unigene14041_All	710	2e-26	PREDICTED: pre-B-cell leukemia transcription factor 1-like isoform 2 [Pongo abelii] >gi|297662856|ref|XP_002809904.1| PREDICTED: pre-B-cell leukemia transcription factor 1-like isoform 4 [Pongo abelii]
Unigene14041_All	710	2e-26	pre-B-cell leukemia homeobox 1 [Homo sapiens] >gi|55958957|emb|CAI14909.1| pre-B-cell leukemia homeobox 1 [Homo sapiens]
Unigene14041_All	710	2e-26	PREDICTED: pre-B-cell leukemia transcription factor 1 isoform 2 [Pan troglodytes]
Unigene14041_All	710	2e-26	PREDICTED: pre-B-cell leukemia transcription factor 1 isoform 1 [Pan troglodytes]
Unigene14041_All	710	2e-26	PREDICTED: similar to Pre-B-cell leukemia transcription factor-1 (Homeobox protein PBX1) isoform 3 [Canis familiaris] >gi|301756733|ref|XP_002914215.1| PREDICTED: pre-B-cell leukemia transcription factor 1-like isoform 1 [Ailuropoda melanoleuca]
Unigene14041_All	710	2e-26	pre-B-cell leukemia transcription factor 1 [Homo sapiens] >gi|34365779|ref|NP_899198.1| pre-B-cell leukemia transcription factor 1 isoform a [Mus musculus] >gi|198442893|ref|NP_001128334.1| pre-B-cell leukemia transcription factor 1 isoform a [Rattus norvegicus] >gi|300795559|ref|NP_001179697.1| pre-B-cell leukemia transcription factor 1 [Bos taurus] >gi|114561075|ref|XP_513961.2| PREDICTED: pre-…
Unigene14041_All	710	2e-26	pre-B-cell leukemia transcription factor 1 isoform b [Mus musculus] >gi|209863018|ref|NP_001094151.1| pre-B-cell leukemia transcription factor 1 isoform b [Rattus norvegicus] >gi|301756735|ref|XP_002914216.1| PREDICTED: pre-B-cell leukemia transcription factor 1-like isoform 2 [Ailuropoda melanoleuca] >gi|456109|gb|AAA21832.1| homeobox protein [Mus musculus] >gi|2432011|gb|AAB71192.1| PBX1b [Mus …
Unigene14041_All	710	3e-26	extradenticle [Polyrhachis vicina]
Unigene14041_All	710	5e-26	PREDICTED: similar to PBX1a [Monodelphis domestica]
Unigene14041_All	710	2e-25	GK20113 [Drosophila willistoni] >gi|194160425|gb|EDW75326.1| GK20113 [Drosophila willistoni]
Unigene14043_All	1845	1e-120	PREDICTED: similar to symplekin [Nasonia vitripennis]
Unigene14043_All	1845	1e-108	PREDICTED: similar to CG2097-PA, partial [Apis mellifera]
Unigene14043_All	1845	1e-108	PREDICTED: symplekin, partial [Oryctolagus cuniculus]
Unigene14043_All	1845	1e-107	PREDICTED: symplekin [Equus caballus]
Unigene14043_All	1845	1e-107	PREDICTED: similar to Symplekin [Canis familiaris]
Unigene14043_All	1845	1e-107	PREDICTED: symplekin [Callithrix jacchus]
Unigene14043_All	1845	1e-107	symplekin, isoform CRA_c [Homo sapiens]
Unigene14043_All	1845	1e-107	PREDICTED: symplekin isoform 9 [Pan troglodytes]
Unigene14043_All	1845	1e-107	PREDICTED: symplekin isoform 10 [Pan troglodytes]
Unigene14043_All	1845	1e-107	PREDICTED: symplekin isoform 6 [Pan troglodytes] >gi|114677936|ref|XP_001166898.1| PREDICTED: symplekin isoform 4 [Pan troglodytes] >gi|114677938|ref|XP_001166932.1| PREDICTED: symplekin isoform 5 [Pan troglodytes] >gi|114677940|ref|XP_001167025.1| PREDICTED: symplekin isoform 8 [Pan troglodytes]
Unigene14043_All	1845	1e-107	PREDICTED: symplekin isoform 7 [Pan troglodytes]
Unigene14043_All	1845	1e-107	symplekin [Homo sapiens] >gi|71153180|sp|Q92797.2|SYMPK_HUMAN RecName: Full=Symplekin >gi|119577793|gb|EAW57389.1| symplekin, isoform CRA_a [Homo sapiens] >gi|119577795|gb|EAW57391.1| symplekin, isoform CRA_a [Homo sapiens]
Unigene14043_All	1845	1e-107	SYMPK variant protein [Homo sapiens]
Unigene14043_All	1845	1e-107	SYMPK protein variant [Homo sapiens]
Unigene14043_All	1845	1e-107	PREDICTED: symplekin-like [Ailuropoda melanoleuca]
Unigene14043_All	1845	1e-107	PREDICTED: similar to Symplekin [Monodelphis domestica]
Unigene14043_All	1845	1e-107	symplekin [Rattus norvegicus]
Unigene14043_All	1845	1e-107	symplekin [Mus musculus]
Unigene14043_All	1845	1e-107	RecName: Full=Symplekin >gi|29436402|gb|AAH49852.1| Sympk protein [Mus musculus]
Unigene14043_All	1845	1e-106	SYMPK protein [Homo sapiens] >gi|211826975|gb|AAH06536.2| SYMPK protein [Homo sapiens]
Unigene14044_All	679	2e-79	PREDICTED: similar to dynactin 4 isoform 1 [Apis mellifera]
Unigene14044_All	679	7e-79	dynactin 4 protein [Bombyx mori] >gi|87248105|gb|ABD36105.1| dynactin 4 protein [Bombyx mori]
Unigene14044_All	679	1e-78	PREDICTED: similar to dynactin 4 protein [Tribolium castaneum]
Unigene14044_All	679	1e-76	dynactin subunit 5 [Nasonia vitripennis]
Unigene14044_All	679	2e-74	dynactin subunit P25 [Schistosoma mansoni]
Unigene14044_All	679	4e-74	dynactin 5 (p25) [Xenopus laevis] >gi|49670462|gb|AAH75220.1| MGC84352 protein [Xenopus laevis]
Unigene14044_All	679	5e-74	dynactin 5 (p25) [Xenopus (Silurana) tropicalis] >gi|56540896|gb|AAH87561.1| dynactin 4 [Xenopus (Silurana) tropicalis]
Unigene14044_All	679	5e-74	PREDICTED: similar to Dynactin 5 (p25) [Gallus gallus]
Unigene14044_All	679	9e-74	dynactin subunit 5 [Pongo abelii] >gi|62900072|sp|Q5R559.1|DCTN5_PONAB RecName: Full=Dynactin subunit 5; AltName: Full=Dynactin subunit p25
Unigene14044_All	679	9e-74	dynactin subunit 5 [Homo sapiens] >gi|57087945|ref|XP_536931.1| PREDICTED: similar to Dynactin subunit 5 (Dynactin subunit p25) [Canis familiaris] >gi|114661610|ref|XP_529769.2| PREDICTED: dynactin 4 isoform 3 [Pan troglodytes] >gi|291390774|ref|XP_002711871.1| PREDICTED: dynactin 5 [Oryctolagus cuniculus] >gi|296219778|ref|XP_002756043.1| PREDICTED: dynactin subunit 5-like [Callithrix jacchus] >…
Unigene14044_All	679	1e-73	dynactin 5 [Bos taurus] >gi|194219127|ref|XP_001501070.2| PREDICTED: similar to dynactin 5 [Equus caballus] >gi|73586671|gb|AAI02999.1| DCTN5 protein [Bos taurus] >gi|296473399|gb|DAA15514.1| dynactin 5 [Bos taurus]
Unigene14044_All	679	1e-73	dynactin subunit 5 [Mus musculus] >gi|62900105|sp|Q9QZB9.1|DCTN5_MOUSE RecName: Full=Dynactin subunit 5; AltName: Full=Dynactin subunit p25 >gi|6176550|gb|AAF05615.1|AF190795_1 dynactin subunit p25 [Mus musculus] >gi|148685324|gb|EDL17271.1| dynactin 5, isoform CRA_c [Mus musculus] >gi|149068012|gb|EDM17564.1| rCG39275, isoform CRA_b [Rattus norvegicus]
Unigene14044_All	679	1e-73	dynactin subunit 5 [Salmo salar] >gi|221220098|gb|ACM08710.1| Dynactin subunit 5 [Salmo salar]
Unigene14044_All	679	2e-73	Dynactin 5 [Mus musculus]
Unigene14044_All	679	2e-73	PREDICTED: similar to Dynactin 5 (p25) [Monodelphis domestica]
Unigene14044_All	679	6e-73	SJCHGC05724 protein [Schistosoma japonicum]
Unigene14044_All	679	6e-73	PREDICTED: similar to Dynactin 5 (p25) [Strongylocentrotus purpuratus]
Unigene14044_All	679	3e-72	dynactin subunit 5 [Danio rerio] >gi|49900794|gb|AAH76304.1| Dynactin 5 [Danio rerio] >gi|182889344|gb|AAI64967.1| Dctn5 protein [Danio rerio]
Unigene14044_All	679	3e-72	dynactin subunit 5 [Rattus norvegicus] >gi|68533667|gb|AAH98764.1| Dynactin 5 [Rattus norvegicus]
Unigene14044_All	679	6e-72	PREDICTED: dynactin 4 isoform 2 [Pan troglodytes]
Unigene14045_All	650	1e-09	GF23569 [Drosophila ananassae] >gi|190617742|gb|EDV33266.1| GF23569 [Drosophila ananassae]
Unigene14045_All	650	2e-07	PREDICTED: mucin 2, partial [Bos taurus]
Unigene14045_All	650	2e-07	PREDICTED: intestinal mucin 2.1-like, partial [Bos taurus] >gi|296491775|gb|DAA33808.1| intestinal mucin 2.1-like [Bos taurus]
Unigene14045_All	650	1e-06	GK17563 [Drosophila willistoni] >gi|194158565|gb|EDW73466.1| GK17563 [Drosophila willistoni]
Unigene14045_All	650	2e-06	surface antigen protein 2 [Leishmania major strain Friedlin]
Unigene14045_All	650	5e-06	PREDICTED: similar to bitesize CG33555-PC [Tribolium castaneum]
Unigene14045_All	650	7e-06	GJ13031 [Drosophila virilis] >gi|194153868|gb|EDW69052.1| GJ13031 [Drosophila virilis]
Unigene14046_All	577	2e-46	PREDICTED: similar to CG13390 CG13390-PA [Acyrthosiphon pisum]
Unigene14046_All	577	3e-46	Putative GTP-binding protein 5 [Aedes aegypti] >gi|108883465|gb|EAT47690.1| Putative GTP-binding protein 5 [Aedes aegypti]
Unigene14046_All	577	4e-45	AGAP009702-PA [Anopheles gambiae str. PEST] >gi|157013953|gb|EAA14310.4| AGAP009702-PA [Anopheles gambiae str. PEST]
Unigene14046_All	577	6e-44	PREDICTED: similar to Putative GTP-binding protein 5 [Tribolium castaneum]
Unigene14046_All	577	8e-44	PREDICTED: GTP-binding protein 5-like [Callithrix jacchus]
Unigene14046_All	577	2e-43	GTP-binding protein 5-like protein [Callithrix jacchus]
Unigene14046_All	577	5e-43	GTP-binding protein 5 [Pongo abelii] >gi|75070910|sp|Q5RDW1.1|GTPB5_PONAB RecName: Full=GTP-binding protein 5
Unigene14046_All	577	7e-43	PREDICTED: GTP-binding protein 5 [Macaca mulatta]
Unigene14046_All	577	9e-43	GTP-binding protein 5 [Homo sapiens] >gi|32469779|sp|Q9H4K7.1|GTPB5_HUMAN RecName: Full=GTP-binding protein 5; AltName: Full=Protein obg homolog 1; Short=ObgH1
Unigene14046_All	577	1e-42	PREDICTED: GTP binding protein 5 isoform 1 [Pan troglodytes] >gi|114682914|ref|XP_514816.2| PREDICTED: GTP binding protein 5 isoform 2 [Pan troglodytes]
Unigene14046_All	577	6e-42	GE11035 [Drosophila yakuba] >gi|194174894|gb|EDW88505.1| GE11035 [Drosophila yakuba]
Unigene14046_All	577	6e-42	PREDICTED: similar to CG13390-PA [Apis mellifera]
Unigene14046_All	577	8e-42	GJ11528 [Drosophila virilis] >gi|194148010|gb|EDW63708.1| GJ11528 [Drosophila virilis]
Unigene14046_All	577	1e-41	GH10882 [Drosophila grimshawi] >gi|193903924|gb|EDW02791.1| GH10882 [Drosophila grimshawi]
Unigene14046_All	577	2e-41	GTP binding protein 5 [Xenopus (Silurana) tropicalis] >gi|89272419|emb|CAJ82811.1| GTP binding protein 5 [Xenopus tropicalis]
Unigene14046_All	577	2e-41	PREDICTED: similar to GTP binding protein 5 [Equus caballus]
Unigene14046_All	577	2e-41	similar to GTP binding protein 5, isoform CRA_a [Rattus norvegicus] >gi|149034048|gb|EDL88831.1| similar to GTP binding protein 5, isoform CRA_a [Rattus norvegicus]
Unigene14046_All	577	3e-41	Gtpbp5 protein [Xenopus laevis]
Unigene14046_All	577	3e-41	GA12249 [Drosophila pseudoobscura pseudoobscura] >gi|54645766|gb|EAL34504.1| GA12249 [Drosophila pseudoobscura pseudoobscura]
Unigene14046_All	577	4e-41	GL25811 [Drosophila persimilis] >gi|194114852|gb|EDW36895.1| GL25811 [Drosophila persimilis]
Unigene14048_All	586	1e-46	PREDICTED: similar to mrp4 [Tribolium castaneum]
Unigene14048_All	586	1e-33	mrp4 [Culex quinquefasciatus] >gi|167882020|gb|EDS45403.1| mrp4 [Culex quinquefasciatus]
Unigene14048_All	586	7e-30	PREDICTED: similar to ENSANGP00000018440 [Nasonia vitripennis]
Unigene14048_All	586	3e-25	GJ23461 [Drosophila virilis] >gi|194151310|gb|EDW66744.1| GJ23461 [Drosophila virilis]
Unigene14048_All	586	3e-25	GI24640 [Drosophila mojavensis] >gi|193916249|gb|EDW15116.1| GI24640 [Drosophila mojavensis]
Unigene14048_All	586	4e-24	GF16469 [Drosophila ananassae] >gi|190628030|gb|EDV43554.1| GF16469 [Drosophila ananassae]
Unigene14048_All	586	7e-24	GA26381 [Drosophila pseudoobscura pseudoobscura] >gi|198132437|gb|EDY68266.1| GA26381 [Drosophila pseudoobscura pseudoobscura]
Unigene14048_All	586	7e-24	GL21725 [Drosophila persimilis] >gi|194112098|gb|EDW34141.1| GL21725 [Drosophila persimilis]
Unigene14048_All	586	3e-23	GG20267 [Drosophila erecta] >gi|190651822|gb|EDV49077.1| GG20267 [Drosophila erecta]
Unigene14048_All	586	6e-23	GH13597 [Drosophila grimshawi] >gi|193896076|gb|EDV94942.1| GH13597 [Drosophila grimshawi]
Unigene14048_All	586	2e-22	GE26347 [Drosophila yakuba] >gi|194183777|gb|EDW97388.1| GE26347 [Drosophila yakuba]
Unigene14048_All	586	4e-22	GD20317 [Drosophila simulans] >gi|194199179|gb|EDX12755.1| GD20317 [Drosophila simulans]
Unigene14048_All	586	4e-22	GM25743 [Drosophila sechellia] >gi|194119942|gb|EDW41985.1| GM25743 [Drosophila sechellia]
Unigene14048_All	586	5e-22	CG31291, isoform C [Drosophila melanogaster] >gi|33636587|gb|AAQ23591.1| RE13779p [Drosophila melanogaster] >gi|158030276|gb|ABW08684.1| CG31291, isoform C [Drosophila melanogaster]
Unigene14048_All	586	5e-22	CG31291, isoform A [Drosophila melanogaster] >gi|23171415|gb|AAF55250.2| CG31291, isoform A [Drosophila melanogaster]
Unigene14048_All	586	5e-22	CG31291, isoform B [Drosophila melanogaster] >gi|23171414|gb|AAF55249.2| CG31291, isoform B [Drosophila melanogaster]
Unigene14048_All	586	2e-21	GK11856 [Drosophila willistoni] >gi|194166165|gb|EDW81066.1| GK11856 [Drosophila willistoni]
Unigene14048_All	586	2e-11	PREDICTED: similar to serologically defined colon cancer antigen 8 [Canis familiaris]
Unigene14048_All	586	3e-11	novel protein similar to vertebrate serologically defined colon cancer antigen 8 (SDCCAG8) [Danio rerio]
Unigene14048_All	586	6e-11	PREDICTED: similar to slinky [Gallus gallus]
Unigene14049_All	463	2e-55	PREDICTED: similar to ENSANGP00000010446 [Nasonia vitripennis]
Unigene14049_All	463	4e-55	PREDICTED: similar to Egl nine homolog 1 (Hypoxia-inducible factor prolyl hydroxylase 2) (HIF-prolyl hydroxylase 2) (HIF-PH2) (HPH-2) (SM-20) [Apis mellifera]
Unigene14049_All	463	1e-54	PREDICTED: similar to HIF prolyl hydroxylase CG31543-PA [Acyrthosiphon pisum]
Unigene14049_All	463	8e-52	HIF prolyl hydroxylase [Tribolium castaneum]
Unigene14049_All	463	3e-51	HIF prolyl hydroxylase [Tribolium castaneum]
Unigene14049_All	463	2e-49	AGAP003523-PA [Anopheles gambiae str. PEST] >gi|157017427|gb|EAA08934.4| AGAP003523-PA [Anopheles gambiae str. PEST]
Unigene14049_All	463	1e-46	hypoxia-inducible factor prolylhydroxylase [Daphnia magna]
Unigene14049_All	463	1e-44	hypoxia-inducible factor prolyl hydroxylase 2 [Ornithodoros coriaceus]
Unigene14049_All	463	3e-43	egl nine homolog 3 [Danio rerio] >gi|44890699|gb|AAH66699.1| Egl nine homolog 3 (C. elegans) [Danio rerio]
Unigene14049_All	463	5e-43	PREDICTED: egl nine homolog 1-like [Ailuropoda melanoleuca]
Unigene14049_All	463	2e-42	PREDICTED: similar to SM-20 [Ornithorhynchus anatinus]
Unigene14049_All	463	2e-42	PREDICTED: similar to SM-20 [Monodelphis domestica]
Unigene14049_All	463	2e-42	PREDICTED: similar to Chain A, Crystal Structure Of Hif Prolyl Hydroxylase Egln-1 In Complex With A Biologically Active Inhibitor, partial [Gallus gallus]
Unigene14049_All	463	2e-42	LOC100036879 protein [Xenopus laevis]
Unigene14049_All	463	3e-42	PREDICTED: egl nine homolog 1 [Oryctolagus cuniculus]
Unigene14049_All	463	3e-42	egl nine 1 protein [Pseudochaenichthys georgianus]
Unigene14049_All	463	3e-42	PREDICTED: similar to egl nine homolog 1 [Canis familiaris]
Unigene14049_All	463	4e-42	PREDICTED: egl nine homolog 1-like [Pongo abelii]
Unigene14049_All	463	4e-42	PREDICTED: egl nine homolog 1, partial [Rattus norvegicus]
Unigene14049_All	463	4e-42	PREDICTED: EGL nine homolog 1 (C. elegans), partial [Rattus norvegicus]
Unigene14050_All	698	6e-28	GI21161 [Drosophila mojavensis] >gi|193911691|gb|EDW10558.1| GI21161 [Drosophila mojavensis]
Unigene14050_All	698	1e-27	GJ21013 [Drosophila virilis] >gi|194143784|gb|EDW60180.1| GJ21013 [Drosophila virilis]
Unigene14050_All	698	2e-26	lipase [Aedes aegypti] >gi|108884491|gb|EAT48716.1| lipase [Aedes aegypti]
Unigene14050_All	698	9e-26	AGAP011121-PA [Anopheles gambiae str. PEST] >gi|157019690|gb|EAA05324.4| AGAP011121-PA [Anopheles gambiae str. PEST]
Unigene14050_All	698	3e-24	GD11231 [Drosophila simulans] >gi|194193846|gb|EDX07422.1| GD11231 [Drosophila simulans]
Unigene14050_All	698	3e-24	GE11832 [Drosophila yakuba] >gi|194178246|gb|EDW91857.1| GE11832 [Drosophila yakuba]
Unigene14050_All	698	3e-24	GM21737 [Drosophila sechellia] >gi|194126169|gb|EDW48212.1| GM21737 [Drosophila sechellia]
Unigene14050_All	698	3e-24	GG20643 [Drosophila erecta] >gi|190658479|gb|EDV55692.1| GG20643 [Drosophila erecta]
Unigene14050_All	698	3e-24	CG6472 [Drosophila melanogaster] >gi|7302862|gb|AAF57935.1| CG6472 [Drosophila melanogaster]
Unigene14050_All	698	2e-22	GK22029 [Drosophila willistoni] >gi|194159731|gb|EDW74632.1| GK22029 [Drosophila willistoni]
Unigene14050_All	698	4e-22	GH22648 [Drosophila grimshawi] >gi|193899617|gb|EDV98483.1| GH22648 [Drosophila grimshawi]
Unigene14050_All	698	1e-16	PREDICTED: similar to AGAP011121-PA, partial [Tribolium castaneum]
Unigene14050_All	698	2e-16	PREDICTED: similar to CG6472 CG6472-PA [Acyrthosiphon pisum]
Unigene14050_All	698	3e-15	GF11422 [Drosophila ananassae] >gi|190621904|gb|EDV37428.1| GF11422 [Drosophila ananassae]
Unigene14050_All	698	2e-14	PREDICTED: similar to CG6472-PA [Apis mellifera]
Unigene14050_All	698	2e-13	PREDICTED: similar to CG6472 CG6472-PA [Tribolium castaneum]
Unigene14050_All	698	3e-12	PREDICTED: similar to IP11459p [Nasonia vitripennis]
Unigene14050_All	698	6e-12	GF21311 [Drosophila ananassae] >gi|190618899|gb|EDV34423.1| GF21311 [Drosophila ananassae]
Unigene14050_All	698	4e-11	PREDICTED: similar to lipase [Nasonia vitripennis]
Unigene14050_All	698	6e-11	GI23290 [Drosophila mojavensis] >gi|193915642|gb|EDW14509.1| GI23290 [Drosophila mojavensis]
Unigene14052_All	959	4e-45	PREDICTED: similar to CG5961-PA [Apis mellifera]
Unigene14052_All	959	2e-44	PREDICTED: similar to ENSANGP00000020271 [Nasonia vitripennis]
Unigene14052_All	959	2e-36	PREDICTED: similar to F-box only protein 9 [Tribolium castaneum]
Unigene14052_All	959	6e-35	F-box only protein 9 [Culex quinquefasciatus] >gi|167874894|gb|EDS38277.1| F-box only protein 9 [Culex quinquefasciatus]
Unigene14052_All	959	2e-32	AGAP006784-PA [Anopheles gambiae str. PEST] >gi|157020664|gb|EAA04165.3| AGAP006784-PA [Anopheles gambiae str. PEST]
Unigene14052_All	959	3e-31	F-box protein 9 [Sus scrofa]
Unigene14052_All	959	3e-30	PREDICTED: F-box only protein 9-like [Saccoglossus kowalevskii]
Unigene14052_All	959	4e-30	F-box only protein 9 [Equus caballus]
Unigene14052_All	959	5e-30	F-box only protein 9 [Pan troglodytes]
Unigene14052_All	959	5e-30	F-box only protein 9 isoform 2 variant [Homo sapiens]
Unigene14052_All	959	5e-30	NY-REN-57 antigen [Homo sapiens]
Unigene14052_All	959	6e-30	F-box only protein 9 [Macaca mulatta]
Unigene14052_All	959	1e-29	PREDICTED: f-box only protein 9-like isoform 1 [Pongo abelii]
Unigene14052_All	959	1e-29	F-box protein 9 [Canis lupus familiaris]
Unigene14052_All	959	2e-29	PREDICTED: similar to F-box protein FBX9 [Ornithorhynchus anatinus]
Unigene14052_All	959	2e-29	F-box protein 9 [Meleagris gallopavo]
Unigene14052_All	959	2e-29	F-box only protein 9 isoform 1 [Homo sapiens] >gi|13124238|sp|Q9UK97.1|FBX9_HUMAN RecName: Full=F-box only protein 9; AltName: Full=Cross-immune reaction antigen 1; AltName: Full=Renal carcinoma antigen NY-REN-57 >gi|6103647|gb|AAF03704.1| F-box protein FBX9 [Homo sapiens] >gi|56202661|emb|CAI20263.1| F-box protein 9 [Homo sapiens]
Unigene14052_All	959	2e-29	F-box only protein 9 isoform 2 [Homo sapiens] >gi|56202660|emb|CAI20262.1| F-box protein 9 [Homo sapiens] >gi|57471971|gb|AAW51115.1| cross-immune reaction antigen [Homo sapiens]
Unigene14052_All	959	4e-29	F-box only protein 9 [Bos taurus] >gi|117940157|sp|Q3ZBT2.1|FBX9_BOVIN RecName: Full=F-box only protein 9 >gi|73586632|gb|AAI03125.1| F-box protein 9 [Bos taurus]
Unigene14052_All	959	5e-29	F-box only protein 9 [Bos taurus]
Unigene14053_All	928	4e-33	chemosensory protein 1 [Glossina morsitans morsitans] >gi|289740103|gb|ADD18799.1| ejaculatory bulb protein III [Glossina morsitans morsitans]
Unigene14053_All	928	1e-31	sensory appendage protein 1 [Culicoides sonorensis]
Unigene14053_All	928	2e-31	GJ20447 [Drosophila virilis] >gi|194144778|gb|EDW61174.1| GJ20447 [Drosophila virilis]
Unigene14053_All	928	3e-31	sensory appendage protein [Culex quinquefasciatus] >gi|167874664|gb|EDS38047.1| sensory appendage protein [Culex quinquefasciatus]
Unigene14053_All	928	3e-31	serine/threonine kinase [Culex quinquefasciatus] >gi|167874646|gb|EDS38029.1| serine/threonine kinase [Culex quinquefasciatus]
Unigene14053_All	928	7e-31	AGAP008054-PA [Anopheles gambiae str. PEST] >gi|116123211|gb|EAA12338.3| AGAP008054-PA [Anopheles gambiae str. PEST]
Unigene14053_All	928	9e-31	chemosensory protein 1 [Delia antiqua]
Unigene14053_All	928	2e-30	GF12892 [Drosophila ananassae] >gi|190620766|gb|EDV36290.1| GF12892 [Drosophila ananassae]
Unigene14053_All	928	3e-30	GH21706 [Drosophila grimshawi] >gi|193903061|gb|EDW01928.1| GH21706 [Drosophila grimshawi]
Unigene14053_All	928	5e-30	GG22923 [Drosophila erecta] >gi|190659714|gb|EDV56927.1| GG22923 [Drosophila erecta]
Unigene14053_All	928	5e-30	ejaculatory bulb protein III [Drosophila melanogaster] >gi|29428069|sp|Q9W1C9.2|PEB3_DROME RecName: Full=Ejaculatory bulb-specific protein 3; AltName: Full=Ejaculatory bulb-specific protein III; AltName: Full=PEB-meIII; AltName: Full=PEBmelIII; Flags: Precursor >gi|21064831|gb|AAM29645.1| RH74005p [Drosophila melanogaster] >gi|21626706|gb|AAF47140.2| ejaculatory bulb protein III [Drosophila melan…
Unigene14053_All	928	8e-30	GD11826 [Drosophila simulans] >gi|194194921|gb|EDX08497.1| GD11826 [Drosophila simulans]
Unigene14053_All	928	8e-30	PebIII [Drosophila yakuba] >gi|194178846|gb|EDW92457.1| PebIII [Drosophila yakuba]
Unigene14053_All	928	1e-29	GM18290 [Drosophila sechellia] >gi|194132336|gb|EDW53904.1| GM18290 [Drosophila sechellia]
Unigene14053_All	928	1e-29	similar to Drosophila melanogaster PebIII [Drosophila yakuba]
Unigene14053_All	928	2e-29	GA10970 [Drosophila pseudoobscura pseudoobscura] >gi|195151259|ref|XP_002016565.1| GL11652 [Drosophila persimilis] >gi|54636052|gb|EAL25455.1| GA10970 [Drosophila pseudoobscura pseudoobscura] >gi|194110412|gb|EDW32455.1| GL11652 [Drosophila persimilis]
Unigene14053_All	928	4e-29	GI18859 [Drosophila mojavensis] >gi|193910914|gb|EDW09781.1| GI18859 [Drosophila mojavensis]
Unigene14053_All	928	4e-29	sensory appendage protein [Anopheles gambiae]
Unigene14053_All	928	4e-29	sensory appendage protein (AGAP008051-PA) [Anopheles gambiae str. PEST] >gi|55237623|gb|EAA12322.2| sensory appendage protein (AGAP008051-PA) [Anopheles gambiae str. PEST]
Unigene14053_All	928	5e-29	GK21931 [Drosophila willistoni] >gi|194159566|gb|EDW74467.1| GK21931 [Drosophila willistoni]
Unigene14054_All	704	2e-62	mitochondrial ribosomal protein S25 [Aedes aegypti] >gi|108884488|gb|EAT48713.1| mitochondrial ribosomal protein S25 [Aedes aegypti]
Unigene14054_All	704	5e-62	PREDICTED: similar to mitochondrial 28S ribosomal protein S25 [Acyrthosiphon pisum]
Unigene14054_All	704	1e-61	mitochondrial 28S ribosomal protein S25 [Culex quinquefasciatus] >gi|167878045|gb|EDS41428.1| mitochondrial 28S ribosomal protein S25 [Culex quinquefasciatus]
Unigene14054_All	704	2e-61	GA12964 [Drosophila pseudoobscura pseudoobscura] >gi|195165410|ref|XP_002023532.1| GL20418 [Drosophila persimilis] >gi|54643127|gb|EAL31871.1| GA12964 [Drosophila pseudoobscura pseudoobscura] >gi|194105637|gb|EDW27680.1| GL20418 [Drosophila persimilis]
Unigene14054_All	704	3e-61	AGAP012136-PA [Anopheles gambiae str. PEST] >gi|116116959|gb|EAA00469.3| AGAP012136-PA [Anopheles gambiae str. PEST]
Unigene14054_All	704	7e-61	GE16111 [Drosophila yakuba] >gi|194188100|gb|EDX01684.1| GE16111 [Drosophila yakuba]
Unigene14054_All	704	9e-61	GM17546 [Drosophila sechellia] >gi|195566736|ref|XP_002106932.1| GD15848 [Drosophila simulans] >gi|194126834|gb|EDW48877.1| GM17546 [Drosophila sechellia] >gi|194204328|gb|EDX17904.1| GD15848 [Drosophila simulans]
Unigene14054_All	704	2e-60	GK10306 [Drosophila willistoni] >gi|194157230|gb|EDW72131.1| GK10306 [Drosophila willistoni]
Unigene14054_All	704	3e-60	mitochondrial ribosomal protein S25 [Drosophila melanogaster] >gi|13633946|sp|Q9VY28.1|RT25_DROME RecName: Full=Probable 28S ribosomal protein S25, mitochondrial; Short=S25mt; Short=MRP-S25 >gi|7292989|gb|AAF48377.1| mitochondrial ribosomal protein S25 [Drosophila melanogaster] >gi|85861109|gb|ABC86504.1| IP01949p [Drosophila melanogaster] >gi|117935353|gb|ABK56982.1| IP01952p [Drosophila melanog…
Unigene14054_All	704	7e-60	GH12785 [Drosophila grimshawi] >gi|193901429|gb|EDW00296.1| GH12785 [Drosophila grimshawi]
Unigene14054_All	704	1e-59	ACYPI008157 [Acyrthosiphon pisum]
Unigene14054_All	704	1e-59	GG19455 [Drosophila erecta] >gi|190649818|gb|EDV47096.1| GG19455 [Drosophila erecta]
Unigene14054_All	704	1e-59	PREDICTED: similar to GA12964-PA [Nasonia vitripennis]
Unigene14054_All	704	1e-59	PREDICTED: similar to mitochondrial 28S ribosomal protein S25 [Tribolium castaneum]
Unigene14054_All	704	2e-59	GF22384 [Drosophila ananassae] >gi|190619560|gb|EDV35084.1| GF22384 [Drosophila ananassae]
Unigene14054_All	704	9e-58	GI14011 [Drosophila mojavensis] >gi|193912115|gb|EDW10982.1| GI14011 [Drosophila mojavensis]
Unigene14054_All	704	3e-56	PREDICTED: similar to Probable mitochondrial 28S ribosomal protein S25 (S25mt) (MRP-S25) [Apis mellifera]
Unigene14054_All	704	1e-55	GJ19070 [Drosophila virilis] >gi|194149436|gb|EDW65127.1| GJ19070 [Drosophila virilis]
Unigene14054_All	704	1e-54	mitochondrial ribosomal protein S25 [Bombyx mori] >gi|95102638|gb|ABF51257.1| mitochondrial 28S ribosomal protein S25 [Bombyx mori]
Unigene14054_All	704	1e-47	PREDICTED: similar to ENSANGP00000014061 [Strongylocentrotus purpuratus] >gi|115945853|ref|XP_001176429.1| PREDICTED: similar to ENSANGP00000014061 [Strongylocentrotus purpuratus]
Unigene14055_All	697	8e-57	PREDICTED: similar to CG3556 CG3556-PA [Tribolium castaneum]
Unigene14055_All	697	4e-55	PREDICTED: similar to CG3556 CG3556-PA [Acyrthosiphon pisum]
Unigene14055_All	697	7e-53	PREDICTED: similar to GH17087p [Nasonia vitripennis]
Unigene14055_All	697	2e-52	PREDICTED: similar to CG3556-PA isoform 2 [Apis mellifera]
Unigene14055_All	697	3e-47	GH17087p [Drosophila melanogaster]
Unigene14055_All	697	4e-47	GD16692 [Drosophila simulans] >gi|194203496|gb|EDX17072.1| GD16692 [Drosophila simulans]
Unigene14055_All	697	4e-47	GM12347 [Drosophila sechellia] >gi|194131127|gb|EDW53170.1| GM12347 [Drosophila sechellia]
Unigene14055_All	697	4e-47	GG18709 [Drosophila erecta] >gi|190648531|gb|EDV45809.1| GG18709 [Drosophila erecta]
Unigene14055_All	697	4e-47	CG3556 [Drosophila melanogaster] >gi|74872708|sp|Q9W4K2.1|Y3556_DROME RecName: Full=Uncharacterized protein CG3556; Flags: Precursor >gi|7290496|gb|AAF45949.1| CG3556 [Drosophila melanogaster] >gi|201065997|gb|ACH92408.1| FI07638p [Drosophila melanogaster]
Unigene14055_All	697	9e-47	GE16347 [Drosophila yakuba] >gi|194187622|gb|EDX01206.1| GE16347 [Drosophila yakuba]
Unigene14055_All	697	3e-46	GA22743 [Drosophila pseudoobscura pseudoobscura] >gi|198145608|gb|EDY72195.1| GA22743 [Drosophila pseudoobscura pseudoobscura]
Unigene14055_All	697	3e-46	GK15758 [Drosophila willistoni] >gi|194171417|gb|EDW86318.1| GK15758 [Drosophila willistoni]
Unigene14055_All	697	3e-46	GL14298 [Drosophila persimilis] >gi|194103746|gb|EDW25789.1| GL14298 [Drosophila persimilis]
Unigene14055_All	697	5e-46	GH12077 [Drosophila grimshawi] >gi|193901158|gb|EDW00025.1| GH12077 [Drosophila grimshawi]
Unigene14055_All	697	6e-46	GF19462 [Drosophila ananassae] >gi|190622892|gb|EDV38416.1| GF19462 [Drosophila ananassae]
Unigene14055_All	697	8e-46	GI21790 [Drosophila mojavensis] >gi|193907665|gb|EDW06532.1| GI21790 [Drosophila mojavensis]
Unigene14055_All	697	2e-45	GJ16962 [Drosophila virilis] >gi|194146960|gb|EDW62679.1| GJ16962 [Drosophila virilis]
Unigene14055_All	697	4e-44	AGAP004726-PA [Anopheles gambiae str. PEST] >gi|157014595|gb|EAA13219.2| AGAP004726-PA [Anopheles gambiae str. PEST]
Unigene14056_All	549	6e-09	PREDICTED: similar to sterile alpha motif domain containing 4 [Gallus gallus]
Unigene14056_All	549	1e-08	PREDICTED: sterile alpha motif domain containing 4A isoform 2 [Taeniopygia guttata]
Unigene14056_All	549	1e-08	PREDICTED: sterile alpha motif domain containing 4A isoform 1 [Taeniopygia guttata]
Unigene14056_All	549	3e-08	PREDICTED: protein Smaug homolog 1-like [Pongo abelii]
Unigene14056_All	549	3e-08	RecName: Full=Protein Smaug homolog 1; Short=Smaug 1; AltName: Full=Sterile alpha motif domain-containing protein 4A >gi|197246438|gb|AAI68894.1| Samd4a protein [Rattus norvegicus]
Unigene14056_All	549	3e-08	protein Smaug homolog 1 [Rattus norvegicus]
Unigene14056_All	549	3e-08	sterile alpha motif domain containing 4, isoform CRA_b [Mus musculus]
Unigene14056_All	549	3e-08	sterile alpha motif domain containing 4, isoform CRA_a [Mus musculus]
Unigene14056_All	549	3e-08	protein Smaug homolog 1 isoform 3 [Homo sapiens] >gi|119601050|gb|EAW80644.1| sterile alpha motif domain containing 4A, isoform CRA_a [Homo sapiens]
Unigene14056_All	549	3e-08	PREDICTED: sterile alpha motif domain containing 4 isoform 4 [Pan troglodytes]
Unigene14056_All	549	3e-08	SAMD4A protein [Homo sapiens]
Unigene14056_All	549	3e-08	protein Smaug homolog 1 isoform 1 [Mus musculus] >gi|254763335|sp|Q8CBY1.2|SMAG1_MOUSE RecName: Full=Protein Smaug homolog 1; Short=Smaug 1; Short=mSmaug 1; AltName: Full=Sterile alpha motif domain-containing protein 4A
Unigene14056_All	549	3e-08	SMAUG protein [Mus musculus]
Unigene14056_All	549	3e-08	protein Smaug homolog 1 isoform 3 [Mus musculus]
Unigene14056_All	549	3e-08	Samd4 protein [Mus musculus] >gi|148688787|gb|EDL20734.1| sterile alpha motif domain containing 4, isoform CRA_c [Mus musculus]
Unigene14056_All	549	3e-08	protein Smaug homolog 1 isoform 2 [Mus musculus] >gi|148877613|gb|AAI45828.1| Sterile alpha motif domain containing 4 [Mus musculus] >gi|148877615|gb|AAI45830.1| Sterile alpha motif domain containing 4 [Mus musculus]
Unigene14056_All	549	4e-08	PREDICTED: protein Smaug homolog 1-like isoform 2 [Ailuropoda melanoleuca]
Unigene14056_All	549	4e-08	PREDICTED: protein Smaug homolog 1-like isoform 1 [Ailuropoda melanoleuca]
Unigene14056_All	549	4e-08	PREDICTED: similar to sterile alpha motif domain containing 4 isoform 1 [Canis familiaris]
Unigene14056_All	549	4e-08	PREDICTED: similar to sterile alpha motif domain containing 4 isoform 2 [Canis familiaris]
Unigene14057_All	783	4e-85	PREDICTED: similar to Probable cytochrome P450 49a1 (CYPXLIXA1) [Apis mellifera]
Unigene14057_All	783	2e-79	PREDICTED: similar to cytochrome P450 [Nasonia vitripennis]
Unigene14057_All	783	1e-74	cytochrome P450 301B1 [Tribolium castaneum] >gi|270006359|gb|EFA02807.1| cytochrome P450 301B1 [Tribolium castaneum]
Unigene14057_All	783	2e-70	PREDICTED: similar to cytochrome P450 [Acyrthosiphon pisum]
Unigene14057_All	783	2e-66	AGAP005774-PA [Anopheles gambiae str. PEST] >gi|157015711|gb|EAA11902.5| AGAP005774-PA [Anopheles gambiae str. PEST]
Unigene14057_All	783	4e-66	cytochrome P450 [Aedes aegypti] >gi|108875339|gb|EAT39564.1| cytochrome P450 [Aedes aegypti]
Unigene14057_All	783	1e-65	Cyp49a1 [Culex quinquefasciatus] >gi|167862306|gb|EDS25689.1| Cyp49a1 [Culex quinquefasciatus]
Unigene14057_All	783	3e-62	GI20196 [Drosophila mojavensis] >gi|193910003|gb|EDW08870.1| GI20196 [Drosophila mojavensis]
Unigene14057_All	783	2e-61	GJ20143 [Drosophila virilis] >gi|194145342|gb|EDW61738.1| GJ20143 [Drosophila virilis]
Unigene14057_All	783	4e-61	PREDICTED: similar to Cyp49a1 [Tribolium castaneum] >gi|270011073|gb|EFA07521.1| cytochrome P450 49A1 [Tribolium castaneum]
Unigene14057_All	783	1e-60	GH20633 [Drosophila grimshawi] >gi|193902246|gb|EDW01113.1| GH20633 [Drosophila grimshawi]
Unigene14057_All	783	2e-60	GL17202 [Drosophila persimilis] >gi|194113437|gb|EDW35480.1| GL17202 [Drosophila persimilis]
Unigene14057_All	783	2e-60	GA14913 [Drosophila pseudoobscura pseudoobscura] >gi|54636932|gb|EAL26335.1| GA14913 [Drosophila pseudoobscura pseudoobscura]
Unigene14057_All	783	5e-60	GF11108 [Drosophila ananassae] >gi|190622526|gb|EDV38050.1| GF11108 [Drosophila ananassae]
Unigene14057_All	783	7e-60	GK18006 [Drosophila willistoni] >gi|194164950|gb|EDW79851.1| GK18006 [Drosophila willistoni]
Unigene14057_All	783	7e-60	PREDICTED: similar to AGAP006082-PA [Tribolium castaneum] >gi|270006458|gb|EFA02906.1| cytochrome P450 301A1 [Tribolium castaneum]
Unigene14057_All	783	2e-59	PREDICTED: similar to GA21183-PA [Nasonia vitripennis]
Unigene14057_All	783	6e-59	GE21497 [Drosophila yakuba] >gi|194176051|gb|EDW89662.1| GE21497 [Drosophila yakuba]
Unigene14057_All	783	1e-58	GG25207 [Drosophila erecta] >gi|190660915|gb|EDV58107.1| GG25207 [Drosophila erecta]
Unigene14057_All	783	1e-58	GD25981 [Drosophila simulans] >gi|194192924|gb|EDX06500.1| GD25981 [Drosophila simulans]
Unigene14058_All	875	4e-49	PREDICTED: similar to lethal (2) k09913 CG3082-PC [Tribolium castaneum]
Unigene14058_All	875	3e-48	AGAP011464-PA [Anopheles gambiae str. PEST] >gi|157014674|gb|EAL39475.3| AGAP011464-PA [Anopheles gambiae str. PEST]
Unigene14058_All	875	2e-46	GI20930 [Drosophila mojavensis] >gi|193911303|gb|EDW10170.1| GI20930 [Drosophila mojavensis]
Unigene14058_All	875	5e-46	GJ20657 [Drosophila virilis] >gi|194144411|gb|EDW60807.1| GJ20657 [Drosophila virilis]
Unigene14058_All	875	1e-44	GM15981 [Drosophila sechellia] >gi|194135368|gb|EDW56884.1| GM15981 [Drosophila sechellia]
Unigene14058_All	875	1e-44	lethal (2) k09913, isoform C [Drosophila melanogaster] >gi|24659015|ref|NP_726284.1| lethal (2) k09913, isoform A [Drosophila melanogaster] >gi|24659021|ref|NP_726285.1| lethal (2) k09913, isoform B [Drosophila melanogaster] >gi|7291522|gb|AAF46947.1| lethal (2) k09913, isoform A [Drosophila melanogaster] >gi|7291523|gb|AAF46948.1| lethal (2) k09913, isoform B [Drosophila melanogaster] >gi|167690…
Unigene14058_All	875	1e-44	lethal (2) k09913, isoform D [Drosophila melanogaster] >gi|21626586|gb|AAM68234.1| lethal (2) k09913, isoform D [Drosophila melanogaster] >gi|25012965|gb|AAN71568.1| RH35959p [Drosophila melanogaster] >gi|220950524|gb|ACL87805.1| l(2)k09913-PD [synthetic construct] >gi|220959440|gb|ACL92263.1| l(2)k09913-PD [synthetic construct]
Unigene14058_All	875	1e-44	GD11735 [Drosophila simulans] >gi|194194730|gb|EDX08306.1| GD11735 [Drosophila simulans]
Unigene14058_All	875	2e-44	lethal (2) k09913 [Drosophila yakuba] >gi|33328973|gb|AAQ09893.1| 1(2)k09913 [Drosophila yakuba] >gi|194178651|gb|EDW92262.1| lethal (2) k09913 [Drosophila yakuba]
Unigene14058_All	875	2e-44	lethal (2) k09913 [Drosophila erecta] >gi|27374257|gb|AAO01014.1| l(2)k09913-PA [Drosophila erecta] >gi|190659527|gb|EDV56740.1| lethal (2) k09913 [Drosophila erecta]
Unigene14058_All	875	7e-44	GA15913 [Drosophila pseudoobscura pseudoobscura] >gi|198135700|gb|EAL24979.2| GA15913 [Drosophila pseudoobscura pseudoobscura]
Unigene14058_All	875	7e-44	GL11302 [Drosophila persimilis] >gi|194109739|gb|EDW31782.1| GL11302 [Drosophila persimilis]
Unigene14058_All	875	1e-43	GH20830 [Drosophila grimshawi] >gi|193901914|gb|EDW00781.1| GH20830 [Drosophila grimshawi]
Unigene14058_All	875	2e-43	PREDICTED: similar to lethal (2) k09913 CG3082-PC, isoform C [Apis mellifera]
Unigene14058_All	875	7e-43	GK19549 [Drosophila willistoni] >gi|194158802|gb|EDW73703.1| GK19549 [Drosophila willistoni]
Unigene14058_All	875	2e-42	uncharacterized conserved protein [Glossina morsitans morsitans]
Unigene14058_All	875	6e-42	GF13561 [Drosophila ananassae] >gi|190622132|gb|EDV37656.1| GF13561 [Drosophila ananassae]
Unigene14058_All	875	3e-19	AGAP011465-PA [Anopheles gambiae str. PEST] >gi|157014673|gb|EDO63530.1| AGAP011465-PA [Anopheles gambiae str. PEST]
Unigene14058_All	875	2e-16	PREDICTED: similar to CG3082-PD [Strongylocentrotus purpuratus] >gi|115967768|ref|XP_001178118.1| PREDICTED: similar to CG3082-PD [Strongylocentrotus purpuratus]
Unigene14058_All	875	4e-16	PREDICTED: lethal (2) k09913-like [Saccoglossus kowalevskii]
Unigene14059_All	753	7e-51	PREDICTED: similar to CG15589-PA [Apis mellifera]
Unigene14059_All	753	1e-49	PREDICTED: similar to g-protein coupled receptor [Tribolium castaneum]
Unigene14059_All	753	1e-47	GA13830 [Drosophila pseudoobscura pseudoobscura] >gi|198132059|gb|EAL28069.2| GA13830 [Drosophila pseudoobscura pseudoobscura]
Unigene14059_All	753	1e-47	GL24053 [Drosophila persimilis] >gi|194102233|gb|EDW24276.1| GL24053 [Drosophila persimilis]
Unigene14059_All	753	5e-47	GH14017 [Drosophila grimshawi] >gi|193891857|gb|EDV90723.1| GH14017 [Drosophila grimshawi]
Unigene14059_All	753	6e-47	GD19844 [Drosophila simulans] >gi|194198260|gb|EDX11836.1| GD19844 [Drosophila simulans]
Unigene14059_All	753	6e-47	GE10185 [Drosophila yakuba] >gi|194184219|gb|EDW97830.1| GE10185 [Drosophila yakuba]
Unigene14059_All	753	6e-47	GM10862 [Drosophila sechellia] >gi|194133548|gb|EDW55064.1| GM10862 [Drosophila sechellia]
Unigene14059_All	753	6e-47	CG15589 [Drosophila melanogaster] >gi|21430626|gb|AAM50991.1| RE35182p [Drosophila melanogaster] >gi|28381078|gb|AAF51908.3| CG15589 [Drosophila melanogaster] >gi|220948328|gb|ACL86707.1| CG15589-PA [synthetic construct]
Unigene14059_All	753	8e-47	GI24390 [Drosophila mojavensis] >gi|193915824|gb|EDW14691.1| GI24390 [Drosophila mojavensis]
Unigene14059_All	753	1e-46	GG13130 [Drosophila erecta] >gi|190650741|gb|EDV47996.1| GG13130 [Drosophila erecta]
Unigene14059_All	753	2e-46	GJ14246 [Drosophila virilis] >gi|194142124|gb|EDW58532.1| GJ14246 [Drosophila virilis]
Unigene14059_All	753	2e-46	GF16374 [Drosophila ananassae] >gi|190628206|gb|EDV43730.1| GF16374 [Drosophila ananassae]
Unigene14059_All	753	9e-46	GK13032 [Drosophila willistoni] >gi|194169715|gb|EDW84616.1| GK13032 [Drosophila willistoni]
Unigene14059_All	753	9e-35	AGAP004124-PA [Anopheles gambiae str. PEST] >gi|157017573|gb|EDO64172.1| AGAP004124-PA [Anopheles gambiae str. PEST]
Unigene14059_All	753	2e-27	AGAP003468-PA [Anopheles gambiae str. PEST] >gi|157018333|gb|EAA07387.4| AGAP003468-PA [Anopheles gambiae str. PEST]
Unigene14059_All	753	3e-23	GH14034 [Drosophila grimshawi] >gi|193891839|gb|EDV90705.1| GH14034 [Drosophila grimshawi]
Unigene14059_All	753	5e-23	GJ14266 [Drosophila virilis] >gi|194142103|gb|EDW58511.1| GJ14266 [Drosophila virilis]
Unigene14059_All	753	8e-23	GE10205 [Drosophila yakuba] >gi|194184242|gb|EDW97853.1| GE10205 [Drosophila yakuba]
Unigene14059_All	753	1e-22	GK13049 [Drosophila willistoni] >gi|194169696|gb|EDW84597.1| GK13049 [Drosophila willistoni]
Unigene14060_All	559	2e-27	PREDICTED: similar to Apolipoprotein D precursor (Apo-D) (ApoD) [Pan troglodytes]
Unigene14060_All	559	4e-27	apolipoprotein D precursor [Homo sapiens] >gi|114034|sp|P05090.1|APOD_HUMAN RecName: Full=Apolipoprotein D; Short=Apo-D; Short=ApoD; Flags: Precursor >gi|178841|gb|AAB59517.1| apolipoprotein D precursor [Homo sapiens] >gi|178847|gb|AAA51764.1| apolipoprotein D precursor [Homo sapiens] >gi|13938509|gb|AAH07402.1| Apolipoprotein D [Homo sapiens] >gi|48145793|emb|CAG33119.1| APOD [Homo sapiens] >gi|…
Unigene14060_All	559	7e-26	PREDICTED: apolipoprotein D-like [Pongo abelii]
Unigene14060_All	559	1e-25	apolipoprotein D precursor [Bos taurus] >gi|122142930|sp|Q32KY0.1|APOD_BOVIN RecName: Full=Apolipoprotein D; Short=Apo-D; Short=ApoD; Flags: Precursor >gi|81674721|gb|AAI09864.1| Apolipoprotein D [Bos taurus]
Unigene14060_All	559	3e-25	apolipoprotein D precursor [Bos taurus]
Unigene14060_All	559	4e-25	PREDICTED: apolipoprotein D [Taeniopygia guttata]
Unigene14060_All	559	8e-25	PREDICTED: apolipoprotein D-like [Macaca mulatta]
Unigene14060_All	559	8e-25	RecName: Full=Apolipoprotein D; Short=Apo-D; Short=ApoD; Flags: Precursor >gi|19716074|dbj|BAB86810.1| apolipoprotein D [Macaca fascicularis]
Unigene14060_All	559	1e-24	apolipoprotein D [Cervus elaphus]
Unigene14060_All	559	7e-24	PREDICTED: apolipoprotein D-like isoform 2 [Ailuropoda melanoleuca]
Unigene14060_All	559	1e-23	PREDICTED: similar to apolipoprotein D [Ornithorhynchus anatinus]
Unigene14060_All	559	2e-23	PREDICTED: similar to apolipoprotein D [Monodelphis domestica]
Unigene14060_All	559	2e-23	PREDICTED: apolipoprotein D-like [Callithrix jacchus]
Unigene14060_All	559	2e-23	PREDICTED: similar to apolipoprotein D [Equus caballus]
Unigene14060_All	559	6e-23	apolipoprotein D [Gallus gallus] >gi|57924235|gb|AAW59546.1| Apolipoprotein D [Gallus gallus]
Unigene14060_All	559	6e-23	RecName: Full=Apolipoprotein D; Short=Apo-D; Short=ApoD; Flags: Precursor >gi|1110553|gb|AAB35199.1| apolipoprotein D [Cavia]
Unigene14060_All	559	8e-23	apolipoprotein D precursor [Mus musculus] >gi|1703342|sp|P51910.1|APOD_MOUSE RecName: Full=Apolipoprotein D; Short=Apo-D; Short=ApoD; Flags: Precursor >gi|847651|gb|AAA67892.1| apolipoprotein D [Mus musculus] >gi|148877672|gb|AAI45908.1| Apolipoprotein D [Mus musculus] >gi|148877674|gb|AAI45910.1| Apolipoprotein D [Mus musculus]
Unigene14060_All	559	1e-22	PREDICTED: similar to Apolipoprotein D precursor (Apo-D) (ApoD) isoform 1 [Canis familiaris] >gi|74002841|ref|XP_859125.1| PREDICTED: similar to Apolipoprotein D precursor (Apo-D) (ApoD) isoform 2 [Canis familiaris]
Unigene14060_All	559	2e-22	PREDICTED: apolipoprotein D-like isoform 1 [Ailuropoda melanoleuca]
Unigene14060_All	559	2e-22	Apolipoprotein D precursor [Osmerus mordax]
Unigene14062_All	1460	4e-14	PREDICTED: similar to hCG1773661 [Homo sapiens] >gi|239757212|ref|XP_002345199.1| PREDICTED: similar to hCG1773661 [Homo sapiens] >gi|119605325|gb|EAW84919.1| hCG1773661 [Homo sapiens]
Unigene14062_All	1460	1e-13	novel KRAB box domain containing protein [Mus musculus]
Unigene14062_All	1460	3e-12	zinc finger protein 605 [Xenopus (Silurana) tropicalis] >gi|117558061|gb|AAI27285.1| LOC100036625 protein [Xenopus (Silurana) tropicalis]
Unigene14062_All	1460	4e-12	zinc finger protein 588, isoform CRA_c [Homo sapiens]
Unigene14062_All	1460	4e-12	zinc finger protein 107 [Homo sapiens] >gi|62243640|ref|NP_001013768.1| zinc finger protein 107 [Homo sapiens] >gi|21542325|sp|Q9UII5.1|ZN107_HUMAN RecName: Full=Zinc finger protein 107; AltName: Full=Zinc finger protein 588; AltName: Full=Zinc finger protein ZFD25 >gi|6088100|dbj|BAA85623.1| zinc finger protein (ZFD25) [Homo sapiens] >gi|28703662|gb|AAH47243.1| Zinc finger protein 107 [Homo sapi…
Unigene14062_All	1460	8e-12	PREDICTED: zinc finger protein 91 [Pan troglodytes]
Unigene14062_All	1460	8e-12	PREDICTED: RE1-silencing transcription factor [Danio rerio]
Unigene14062_All	1460	1e-11	PREDICTED: similar to Zinc finger protein 271 (Zinc finger protein 7) (HZF7) (Zinc finger protein ZNFphex133) (Epstein-Barr virus-induced zinc finger protein) (ZNF-EB) (CT-ZFP48) (Zinc finger protein dp) (ZNF-dp), partial [Acyrthosiphon pisum]
Unigene14062_All	1460	1e-11	PREDICTED: similar to zinc finger protein (ZFD25) isoform 1 [Pan troglodytes] >gi|114613678|ref|XP_001136893.1| PREDICTED: similar to zinc finger protein (ZFD25) isoform 2 [Pan troglodytes]
Unigene14062_All	1460	2e-11	RIKEN cDNA 2610008E11, isoform CRA_b [Mus musculus]
Unigene14062_All	1460	2e-11	RIKEN cDNA 2610008E11, isoform CRA_a [Mus musculus]
Unigene14062_All	1460	2e-11	RIKEN cDNA 2610008E11 gene [Mus musculus]
Unigene14062_All	1460	3e-11	PREDICTED: RIKEN cDNA 2610008E11-like [Rattus norvegicus] >gi|293360386|ref|XP_001077082.2| PREDICTED: RIKEN cDNA 2610008E11-like [Rattus norvegicus]
Unigene14062_All	1460	4e-11	PREDICTED: similar to pita CG3941-PA, isoform A [Apis mellifera]
Unigene14062_All	1460	4e-11	Stretchin-Mlck, isoform D [Drosophila melanogaster] >gi|21645322|gb|AAF58087.2| Stretchin-Mlck, isoform D [Drosophila melanogaster]
Unigene14062_All	1460	4e-11	Stretchin-Mlck, isoform A [Drosophila melanogaster] >gi|21645317|gb|AAM70936.1| Stretchin-Mlck, isoform A [Drosophila melanogaster]
Unigene14062_All	1460	5e-11	PREDICTED: zinc finger protein 107-like, partial [Macaca mulatta]
Unigene14062_All	1460	9e-11	PREDICTED: si:ch73-92e7.6 [Danio rerio]
Unigene14062_All	1460	9e-11	zinc finger protein 91 (HPF7, HTF10) [Homo sapiens]
Unigene14062_All	1460	9e-11	zinc finger protein 91 [Homo sapiens]
Unigene14063_All	806	4e-32	PREDICTED: similar to fushi tarazu repressor [Acyrthosiphon pisum]
Unigene14063_All	806	3e-23	GI23126 [Drosophila mojavensis] >gi|193915925|gb|EDW14792.1| GI23126 [Drosophila mojavensis]
Unigene14063_All	806	4e-23	GJ23100 [Drosophila virilis] >gi|194151962|gb|EDW67396.1| GJ23100 [Drosophila virilis]
Unigene14063_All	806	4e-23	GM16442 [Drosophila sechellia] >gi|194128928|gb|EDW50971.1| GM16442 [Drosophila sechellia]
Unigene14063_All	806	4e-23	tramtrack, isoform D [Drosophila melanogaster] >gi|24651711|ref|NP_733447.1| tramtrack, isoform F [Drosophila melanogaster] >gi|45549269|ref|NP_524911.3| tramtrack, isoform C [Drosophila melanogaster] >gi|20455517|sp|P17789.2|TTKB_DROME RecName: Full=Protein tramtrack, beta isoform; AltName: Full=Tramtrack p69; AltName: Full=Repressor protein fushi tarazu >gi|297497|emb|CAA50634.1| tramtrack p69 …
Unigene14063_All	806	2e-22	fushi tarazu repressor [Drosophila melanogaster]
Unigene14063_All	806	6e-22	GH18647 [Drosophila grimshawi] >gi|193893897|gb|EDV92763.1| GH18647 [Drosophila grimshawi]
Unigene14063_All	806	5e-21	GF22979 [Drosophila ananassae] >gi|190614848|gb|EDV30372.1| GF22979 [Drosophila ananassae]
Unigene14063_All	806	1e-18	PREDICTED: similar to Protein tramtrack, beta isoform (Tramtrack p69) (Repressor protein fushi tarazu) [Apis mellifera]
Unigene14063_All	806	2e-18	PREDICTED: similar to ENSANGP00000010462 [Nasonia vitripennis]
Unigene14063_All	806	6e-11	GK12114 [Drosophila willistoni] >gi|194166626|gb|EDW81527.1| GK12114 [Drosophila willistoni]
Unigene14063_All	806	4e-08	tramtrack [Tribolium castaneum]
Unigene14063_All	806	5e-06	AGAP009994-PA [Anopheles gambiae str. PEST] >gi|157014166|gb|EAA13898.4| AGAP009994-PA [Anopheles gambiae str. PEST]
Unigene14063_All	806	6e-06	PREDICTED: PR domain zinc finger protein 15-like, partial [Pongo abelii]
Unigene14063_All	806	6e-06	PREDICTED: similar to zinc finger protein [Nasonia vitripennis]
Unigene14063_All	806	6e-06	zinc finger protein ZNF298d [Homo sapiens]
Unigene14064_All	431	2e-39	PREDICTED: similar to histone-lysine n-methyltransferase [Nasonia vitripennis]
Unigene14064_All	431	2e-39	PREDICTED: similar to CG30426-PA [Apis mellifera]
Unigene14064_All	431	7e-39	histone-lysine n-methyltransferase [Aedes aegypti] >gi|108880107|gb|EAT44332.1| histone-lysine n-methyltransferase [Aedes aegypti]
Unigene14064_All	431	2e-38	PREDICTED: suppressor of variegation 3-9 homolog 1-like [Saccoglossus kowalevskii]
Unigene14064_All	431	3e-38	PREDICTED: similar to GA15838-PA [Tribolium castaneum]
Unigene14064_All	431	3e-38	histone-lysine N-methyltransferase SETDB1 [Culex quinquefasciatus] >gi|167880451|gb|EDS43834.1| histone-lysine N-methyltransferase SETDB1 [Culex quinquefasciatus]
Unigene14064_All	431	6e-38	histone-lysine N-methyltransferase [Artemia franciscana]
Unigene14064_All	431	1e-37	PREDICTED: similar to Histone-lysine N-methyltransferase eggless (SETDB1 homolog) [Acyrthosiphon pisum]
Unigene14064_All	431	5e-37	GK21652 [Drosophila willistoni] >gi|194159030|gb|EDW73931.1| GK21652 [Drosophila willistoni]
Unigene14064_All	431	1e-36	PREDICTED: histone-lysine N-methyltransferase SETDB1-like [Ailuropoda melanoleuca]
Unigene14064_All	431	1e-36	PREDICTED: SET domain, bifurcated 1 [Rattus norvegicus]
Unigene14064_All	431	1e-36	PREDICTED: SET domain, bifurcated 1 [Rattus norvegicus]
Unigene14064_All	431	1e-36	histone-lysine N-methyltransferase SETDB1 isoform a [Mus musculus] >gi|254692952|ref|NP_001157113.1| histone-lysine N-methyltransferase SETDB1 isoform a [Mus musculus]
Unigene14064_All	431	1e-36	SET domain bifurcated 1 [Sus scrofa]
Unigene14064_All	431	1e-36	rCG51706, isoform CRA_a [Rattus norvegicus]
Unigene14064_All	431	1e-36	histone-lysine N-methyltransferase SETDB1 isoform b [Mus musculus] >gi|148706860|gb|EDL38807.1| mCG16729, isoform CRA_a [Mus musculus]
Unigene14064_All	431	1e-36	mCG16729, isoform CRA_b [Mus musculus]
Unigene14064_All	431	1e-36	SET domain, bifurcated 1, isoform CRA_c [Homo sapiens]
Unigene14064_All	431	1e-36	SET domain, bifurcated 1, isoform CRA_a [Homo sapiens]
Unigene14064_All	431	1e-36	PREDICTED: SET domain, bifurcated 1 [Pan troglodytes]
Unigene14066_All	431	1e-19	PREDICTED: similar to vacuolar ATP synthase subunit G-like protein [Acyrthosiphon pisum]
Unigene14066_All	431	5e-19	vacuolar ATP synthase subunit G-like protein [Acyrthosiphon pisum] >gi|89574481|gb|ABD76371.1| vacuolar ATP synthase subunit G-like protein [Acyrthosiphon pisum] >gi|239788148|dbj|BAH70766.1| ACYPI000034 [Acyrthosiphon pisum] >gi|239788150|dbj|BAH70767.1| ACYPI000034 [Acyrthosiphon pisum] >gi|239788152|dbj|BAH70768.1| ACYPI000034 [Acyrthosiphon pisum]
Unigene14066_All	431	6e-19	ACYPI000034 [Acyrthosiphon pisum]
Unigene14066_All	431	1e-18	vacuolar ATPase G subunit-like protein [Graphocephala atropunctata]
Unigene14066_All	431	9e-18	RecName: Full=V-type proton ATPase subunit G; Short=V-ATPase subunit G; AltName: Full=Vacuolar proton pump subunit G; AltName: Full=V-ATPase 13 kDa subunit >gi|1061195|emb|CAA63422.1| vacuolar ATPase G subunit [Manduca sexta] >gi|1589558|prf||2211337A vacuolar ATPase:SUBUNIT=G
Unigene14066_All	431	1e-17	vacuolar ATP synthase subunit G [Bombyx mori] >gi|87248641|gb|ABD36373.1| vacuolar ATP synthase subunit G [Bombyx mori]
Unigene14066_All	431	3e-17	PREDICTED: similar to Vacuolar ATP synthase subunit G (V-ATPase G subunit) (Vacuolar proton pump G subunit) (V-ATPase 13 kDa subunit) [Apis mellifera]
Unigene14066_All	431	7e-17	vacuolar ATP synthase subunit g [Aedes aegypti] >gi|108876927|gb|EAT41152.1| vacuolar ATP synthase subunit g [Aedes aegypti]
Unigene14066_All	431	1e-16	PREDICTED: similar to vacuolar ATP synthase subunit G-like protein [Nasonia vitripennis]
Unigene14066_All	431	5e-16	vacuolar ATPase G subunit-like protein [Maconellicoccus hirsutus]
Unigene14066_All	431	5e-16	vacuolar ATP synthase subunit g [Aedes aegypti] >gi|108870231|gb|EAT34456.1| vacuolar ATP synthase subunit g [Aedes aegypti]
Unigene14066_All	431	8e-16	vacuolar ATP synthase subunit g [Culex quinquefasciatus] >gi|167877018|gb|EDS40401.1| vacuolar ATP synthase subunit g [Culex quinquefasciatus]
Unigene14066_All	431	1e-15	AGAP004867-PA [Anopheles gambiae str. PEST] >gi|116128098|gb|EAA09716.3| AGAP004867-PA [Anopheles gambiae str. PEST]
Unigene14066_All	431	1e-15	vacuolar ATP synthase subunit G [Brugia malayi]
Unigene14066_All	431	2e-15	PREDICTED: similar to vacuolar ATP synthase subunit G [Tribolium castaneum]
Unigene14066_All	431	2e-15	C. briggsae CBR-VHA-10 protein [Caenorhabditis briggsae] >gi|74789928|sp|Q617N0.1|VATG_CAEBR RecName: Full=Probable V-type proton ATPase subunit G; Short=V-ATPase subunit G; AltName: Full=Vacuolar proton pump subunit G >gi|187027539|emb|CAP33309.1| C. briggsae CBR-VHA-10 protein [Caenorhabditis briggsae]
Unigene14066_All	431	2e-15	Vacuolar H ATPase family member (vha-10) [Caenorhabditis elegans] >gi|3183198|sp|P91303.1|VATG_CAEEL RecName: Full=Probable V-type proton ATPase subunit G; Short=V-ATPase subunit G; AltName: Full=Vacuolar proton pump subunit G >gi|13384453|gb|AAK21386.1| Vacuolar h atpase protein 10 [Caenorhabditis elegans]
Unigene14066_All	431	3e-15	vacuolar H+-ATPase v1 sector subunit G [Glossina morsitans morsitans]
Unigene14066_All	431	3e-15	PREDICTED: similar to vacuolar ATPase G subunit-like protein [Strongylocentrotus purpuratus] >gi|115740269|ref|XP_001175674.1| PREDICTED: similar to vacuolar ATPase G subunit-like protein [Strongylocentrotus purpuratus]
Unigene14066_All	431	5e-15	vacuolar ATP synthase subunit g [Aedes aegypti] >gi|94469288|gb|ABF18493.1| vacuolar H+-ATPase V1 sector subunit G [Aedes aegypti] >gi|108870758|gb|EAT34983.1| vacuolar ATP synthase subunit g [Aedes aegypti]
Unigene14068_All	507	5e-21	glutamic pyruvate transaminase 2 [Glossina morsitans morsitans]
Unigene14068_All	507	7e-21	PREDICTED: similar to glutamic pyruvate transaminase (alanine aminotransferase) 2 [Ciona intestinalis]
Unigene14068_All	507	7e-21	GA22670 [Drosophila pseudoobscura pseudoobscura] >gi|198145809|gb|EDY72311.1| GA22670 [Drosophila pseudoobscura pseudoobscura]
Unigene14068_All	507	1e-20	alanine aminotransferase [Culex quinquefasciatus] >gi|170065314|ref|XP_001867887.1| alanine aminotransferase [Culex quinquefasciatus] >gi|167877173|gb|EDS40556.1| alanine aminotransferase [Culex quinquefasciatus] >gi|167882404|gb|EDS45787.1| alanine aminotransferase [Culex quinquefasciatus]
Unigene14068_All	507	2e-20	GK17070 [Drosophila willistoni] >gi|194171349|gb|EDW86250.1| GK17070 [Drosophila willistoni]
Unigene14068_All	507	2e-20	GI15248 [Drosophila mojavensis] >gi|193907862|gb|EDW06729.1| GI15248 [Drosophila mojavensis]
Unigene14068_All	507	2e-20	PREDICTED: similar to alanine aminotransferase [Acyrthosiphon pisum]
Unigene14068_All	507	3e-20	GJ14820 [Drosophila virilis] >gi|194147238|gb|EDW62953.1| GJ14820 [Drosophila virilis]
Unigene14068_All	507	3e-20	GH24493 [Drosophila grimshawi] >gi|193892792|gb|EDV91658.1| GH24493 [Drosophila grimshawi]
Unigene14068_All	507	5e-20	alanine aminotransferase [Aedes aegypti] >gi|108873981|gb|EAT38206.1| alanine aminotransferase [Aedes aegypti]
Unigene14068_All	507	6e-20	GD17120 [Drosophila simulans] >gi|194204245|gb|EDX17821.1| GD17120 [Drosophila simulans]
Unigene14068_All	507	6e-20	GM11628 [Drosophila sechellia] >gi|194126976|gb|EDW49019.1| GM11628 [Drosophila sechellia]
Unigene14068_All	507	6e-20	AGAP000901-PA [Anopheles gambiae str. PEST] >gi|157015320|gb|EAA12069.4| AGAP000901-PA [Anopheles gambiae str. PEST]
Unigene14068_All	507	6e-20	alanine aminotransferase [Aedes aegypti] >gi|108873982|gb|EAT38207.1| alanine aminotransferase [Aedes aegypti]
Unigene14068_All	507	6e-20	alanine aminotransferase [Aedes aegypti] >gi|108873983|gb|EAT38208.1| alanine aminotransferase [Aedes aegypti]
Unigene14068_All	507	6e-20	SD05601p [Drosophila melanogaster]
Unigene14068_All	507	6e-20	CG1640, isoform B [Drosophila melanogaster] >gi|45447088|gb|AAF48263.3| CG1640, isoform B [Drosophila melanogaster] >gi|162944688|gb|ABY20413.1| AT04676p [Drosophila melanogaster]
Unigene14068_All	507	6e-20	CG1640, isoform A [Drosophila melanogaster] >gi|24641764|ref|NP_727697.1| CG1640, isoform C [Drosophila melanogaster] >gi|24641766|ref|NP_727698.1| CG1640, isoform D [Drosophila melanogaster] >gi|24641768|ref|NP_727699.1| CG1640, isoform E [Drosophila melanogaster] >gi|24641770|ref|NP_727700.1| CG1640, isoform F [Drosophila melanogaster] >gi|22832188|gb|AAF48262.2| CG1640, isoform A [Drosophila m…
Unigene14068_All	507	8e-20	PREDICTED: similar to alanine aminotransferase [Nasonia vitripennis]
Unigene14068_All	507	1e-19	GG17777 [Drosophila erecta] >gi|190649927|gb|EDV47205.1| GG17777 [Drosophila erecta]
Unigene14070_All	576	4e-13	PREDICTED: CD27-binding (Siva) protein-like [Saccoglossus kowalevskii]
Unigene14070_All	576	5e-07	SIVA1, apoptosis-inducing factor [Xenopus laevis] >gi|122063399|gb|AAI28982.1| LOC100037065 protein [Xenopus laevis]
Unigene14070_All	576	6e-07	LOC100049128 protein [Xenopus laevis]
Unigene14071_All	564	9e-19	PREDICTED: similar to ENSANGP00000017014 [Nasonia vitripennis]
Unigene14071_All	564	9e-19	PREDICTED: similar to CG11658-PA, isoform A [Apis mellifera]
Unigene14071_All	564	2e-08	GH16387 [Drosophila grimshawi] >gi|193897808|gb|EDV96674.1| GH16387 [Drosophila grimshawi]
Unigene14071_All	564	2e-08	GF24522 [Drosophila ananassae] >gi|190623857|gb|EDV39381.1| GF24522 [Drosophila ananassae]
Unigene14071_All	564	3e-08	f-box protein [Glossina morsitans morsitans]
Unigene14071_All	564	3e-08	GM24720 [Drosophila sechellia] >gi|194119101|gb|EDW41144.1| GM24720 [Drosophila sechellia]
Unigene14071_All	564	3e-08	GG13895 [Drosophila erecta] >gi|190654208|gb|EDV51451.1| GG13895 [Drosophila erecta]
Unigene14071_All	564	3e-08	CG11658, isoform A [Drosophila melanogaster] >gi|45553061|ref|NP_996058.1| CG11658, isoform E [Drosophila melanogaster] >gi|45553063|ref|NP_996059.1| CG11658, isoform D [Drosophila melanogaster] >gi|45553065|ref|NP_996060.1| CG11658, isoform C [Drosophila melanogaster] >gi|45553067|ref|NP_996061.1| CG11658, isoform B [Drosophila melanogaster] >gi|195493553|ref|XP_002094467.1| GE20186 [Drosophila …
Unigene14071_All	564	4e-08	GL16340 [Drosophila persimilis] >gi|194115526|gb|EDW37569.1| GL16340 [Drosophila persimilis]
Unigene14071_All	564	4e-08	GA11124 [Drosophila pseudoobscura pseudoobscura] >gi|54640879|gb|EAL29630.1| GA11124 [Drosophila pseudoobscura pseudoobscura]
Unigene14071_All	564	9e-08	GJ11260 [Drosophila virilis] >gi|194155770|gb|EDW70954.1| GJ11260 [Drosophila virilis]
Unigene14071_All	564	1e-07	AGAP012127-PA [Anopheles gambiae str. PEST] >gi|55234533|gb|EAA00719.3| AGAP012127-PA [Anopheles gambiae str. PEST]
Unigene14071_All	564	2e-07	GI11581 [Drosophila mojavensis] >gi|193920465|gb|EDW19332.1| GI11581 [Drosophila mojavensis]
Unigene14071_All	564	5e-07	GK12401 [Drosophila willistoni] >gi|194164191|gb|EDW79092.1| GK12401 [Drosophila willistoni]
Unigene14073_All	421	3e-28	PREDICTED: similar to serine (or cysteine) proteinase inhibitor, clade A, member 1d [Acyrthosiphon pisum]
Unigene14073_All	421	8e-11	GF13145 [Drosophila ananassae] >gi|190621289|gb|EDV36813.1| GF13145 [Drosophila ananassae]
Unigene14073_All	421	6e-09	GM20903 [Drosophila sechellia] >gi|194124630|gb|EDW46673.1| GM20903 [Drosophila sechellia]
Unigene14073_All	421	6e-09	GM11939 [Drosophila sechellia] >gi|194122081|gb|EDW44124.1| GM11939 [Drosophila sechellia]
Unigene14073_All	421	1e-08	GD10430 [Drosophila simulans] >gi|194192357|gb|EDX05933.1| GD10430 [Drosophila simulans]
Unigene14073_All	421	1e-08	GI19760 [Drosophila mojavensis] >gi|193909225|gb|EDW08092.1| GI19760 [Drosophila mojavensis]
Unigene14073_All	421	1e-08	RecName: Full=Serine protease inhibitor 3/4; Short=Serpin-3/4; Flags: Precursor >gi|56462294|gb|AAV91430.1| serpin 3 [Lonomia obliqua]
Unigene14073_All	421	2e-08	GL11125 [Drosophila persimilis] >gi|194109384|gb|EDW31427.1| GL11125 [Drosophila persimilis]
Unigene14073_All	421	2e-08	serine protease inhibitor 4 [Lonomia obliqua]
Unigene14073_All	421	3e-08	GA21800 [Drosophila pseudoobscura pseudoobscura] >gi|198135452|gb|EAL24740.2| GA21800 [Drosophila pseudoobscura pseudoobscura]
Unigene14073_All	421	3e-08	GA24549 [Drosophila pseudoobscura pseudoobscura] >gi|198135451|gb|EDY68728.1| GA24549 [Drosophila pseudoobscura pseudoobscura]
Unigene14073_All	421	3e-08	GL10964 [Drosophila persimilis] >gi|194109383|gb|EDW31426.1| GL10964 [Drosophila persimilis]
Unigene14073_All	421	4e-08	GK20885 [Drosophila willistoni] >gi|194157462|gb|EDW72363.1| GK20885 [Drosophila willistoni]
Unigene14073_All	421	5e-08	GJ18486 [Drosophila virilis] >gi|194142402|gb|EDW58808.1| GJ18486 [Drosophila virilis]
Unigene14073_All	421	8e-08	serpin 2 precursor [Branchiostoma lanceolatum]
Unigene14073_All	421	8e-08	AT24862p [Drosophila melanogaster]
Unigene14073_All	421	8e-08	CG9455 [Drosophila melanogaster] >gi|21645140|gb|AAF57407.2| CG9455 [Drosophila melanogaster]
Unigene14073_All	421	1e-07	GF12444 [Drosophila ananassae] >gi|190619983|gb|EDV35507.1| GF12444 [Drosophila ananassae]
Unigene14073_All	421	1e-07	plasminogen activator inhibitor 1 [Culex quinquefasciatus] >gi|167880361|gb|EDS43744.1| plasminogen activator inhibitor 1 [Culex quinquefasciatus]
Unigene14073_All	421	2e-07	GH19862 [Drosophila grimshawi] >gi|193903613|gb|EDW02480.1| GH19862 [Drosophila grimshawi]
Unigene14075_All	593	5e-40	PREDICTED: similar to AGAP005506-PA [Tribolium castaneum]
Unigene14075_All	593	3e-39	boule [Tribolium castaneum]
Unigene14075_All	593	8e-35	PREDICTED: similar to boule CG4760-PB, isoform B [Apis mellifera]
Unigene14075_All	593	1e-33	AGAP005506-PA [Anopheles gambiae str. PEST] >gi|157015488|gb|EAA11746.3| AGAP005506-PA [Anopheles gambiae str. PEST]
Unigene14075_All	593	2e-31	GE21261 [Drosophila yakuba] >gi|194179459|gb|EDW93070.1| GE21261 [Drosophila yakuba]
Unigene14075_All	593	2e-31	GJ12804 [Drosophila virilis] >gi|194153423|gb|EDW68607.1| GJ12804 [Drosophila virilis]
Unigene14075_All	593	2e-31	GM24891 [Drosophila sechellia] >gi|194118771|gb|EDW40814.1| GM24891 [Drosophila sechellia]
Unigene14075_All	593	2e-31	GI16553 [Drosophila mojavensis] >gi|193918486|gb|EDW17353.1| GI16553 [Drosophila mojavensis]
Unigene14075_All	593	2e-31	GG15038 [Drosophila erecta] >gi|190653343|gb|EDV50586.1| GG15038 [Drosophila erecta]
Unigene14075_All	593	2e-31	boule, isoform A [Drosophila melanogaster] >gi|24661394|ref|NP_729458.1| boule, isoform C [Drosophila melanogaster] >gi|23093862|gb|AAF50316.3| boule, isoform A [Drosophila melanogaster] >gi|23093863|gb|AAN11987.1| boule, isoform C [Drosophila melanogaster]
Unigene14075_All	593	2e-31	boule, isoform B [Drosophila melanogaster] >gi|24661386|ref|NP_729456.1| boule, isoform D [Drosophila melanogaster] >gi|44887716|sp|Q24207.1|BOULE_DROME RecName: Full=Protein boule >gi|1395211|gb|AAC47133.1| boule protein [Drosophila melanogaster] >gi|23093860|gb|AAF50317.3| boule, isoform B [Drosophila melanogaster] >gi|23093861|gb|AAN11986.1| boule, isoform D [Drosophila melanogaster]
Unigene14075_All	593	2e-31	PREDICTED: similar to ENSANGP00000021673 [Nasonia vitripennis]
Unigene14075_All	593	5e-31	GK24376 [Drosophila willistoni] >gi|194165238|gb|EDW80139.1| GK24376 [Drosophila willistoni]
Unigene14075_All	593	5e-31	GH15900 [Drosophila grimshawi] >gi|193896927|gb|EDV95793.1| GH15900 [Drosophila grimshawi]
Unigene14075_All	593	5e-31	GF23585 [Drosophila ananassae] >gi|190625592|gb|EDV41116.1| GF23585 [Drosophila ananassae]
Unigene14075_All	593	2e-27	PREDICTED: protein boule-like isoform 1 [Pongo abelii]
Unigene14075_All	593	2e-27	bol, boule-like (Drosophila), isoform CRA_a [Mus musculus]
Unigene14075_All	593	2e-27	protein boule-like isoform 1 [Homo sapiens] >gi|119590579|gb|EAW70173.1| bol, boule-like (Drosophila), isoform CRA_c [Homo sapiens]
Unigene14075_All	593	3e-27	PREDICTED: similar to boule isoform 1 [Canis familiaris]
Unigene14075_All	593	4e-27	PREDICTED: protein boule-like [Ailuropoda melanoleuca]
Unigene14077_All	528	7e-81	sugar transporter 16 [Nilaparvata lugens]
Unigene14077_All	528	8e-32	PREDICTED: similar to sugar transporter [Tribolium castaneum]
Unigene14077_All	528	4e-29	PREDICTED: similar to CG8249-PA [Apis mellifera]
Unigene14077_All	528	6e-29	PREDICTED: similar to CG4797-PB, isoform B [Apis mellifera]
Unigene14077_All	528	8e-29	sugar transporter 12 [Nilaparvata lugens]
Unigene14077_All	528	1e-28	AGAP007667-PA [Anopheles gambiae str. PEST] >gi|157019897|gb|EAA04222.4| AGAP007667-PA [Anopheles gambiae str. PEST]
Unigene14077_All	528	1e-27	sugar transporter [Aedes aegypti] >gi|108871321|gb|EAT35546.1| sugar transporter [Aedes aegypti]
Unigene14077_All	528	2e-26	sugar transporter [Culex quinquefasciatus] >gi|167863241|gb|EDS26624.1| sugar transporter [Culex quinquefasciatus]
Unigene14077_All	528	1e-25	PREDICTED: similar to AGAP007667-PA [Acyrthosiphon pisum]
Unigene14077_All	528	1e-25	PREDICTED: similar to AGAP007667-PA [Acyrthosiphon pisum]
Unigene14077_All	528	3e-25	PREDICTED: similar to ENSANGP00000020718 [Nasonia vitripennis]
Unigene14077_All	528	7e-25	PREDICTED: similar to sugar transporter [Nasonia vitripennis]
Unigene14077_All	528	7e-25	PREDICTED: similar to sugar transporter [Tribolium castaneum]
Unigene14077_All	528	9e-25	AGAP012218-PA [Anopheles gambiae str. PEST] >gi|157013134|gb|EAA00109.4| AGAP012218-PA [Anopheles gambiae str. PEST]
Unigene14077_All	528	2e-24	PREDICTED: similar to sugar transporter [Tribolium castaneum]
Unigene14077_All	528	1e-23	AGAP005600-PA [Anopheles gambiae str. PEST] >gi|157015573|gb|EAA11457.4| AGAP005600-PA [Anopheles gambiae str. PEST]
Unigene14077_All	528	2e-23	AGAP008721-PA [Anopheles gambiae str. PEST] >gi|157016730|gb|EAA44374.4| AGAP008721-PA [Anopheles gambiae str. PEST]
Unigene14077_All	528	2e-23	PREDICTED: similar to AGAP007667-PA [Tribolium castaneum]
Unigene14077_All	528	3e-23	sugar transporter [Aedes aegypti] >gi|108880575|gb|EAT44800.1| sugar transporter [Aedes aegypti]
Unigene14077_All	528	6e-23	GK19610 [Drosophila willistoni] >gi|194158818|gb|EDW73719.1| GK19610 [Drosophila willistoni]
Unigene14078_All	596	4e-62	PREDICTED: similar to ubiquitously transcribed tetratricopeptide repeat gene, X chromosome, partial [Apis mellifera]
Unigene14078_All	596	5e-44	PREDICTED: similar to uty-prov protein [Tribolium castaneum]
Unigene14078_All	596	5e-32	PREDICTED: ubiquitously transcribed tetratricopeptide repeat, X chromosome [Taeniopygia guttata]
Unigene14078_All	596	5e-32	PREDICTED: similar to ubiquitously transcribed tetratricopeptide repeat, X chromosome isoform 1 [Monodelphis domestica]
Unigene14078_All	596	5e-32	PREDICTED: similar to ubiquitously transcribed tetratricopeptide repeat, X chromosome isoform 2 [Monodelphis domestica]
Unigene14078_All	596	4e-31	novel protein similar to human and mouse ubiquitously transcribed tetratricopeptide repeat, X chromosome (UTX) [Danio rerio]
Unigene14078_All	596	4e-31	PREDICTED: ubiquitously transcribed tetratricopeptide repeat, X chromosome [Danio rerio]
Unigene14078_All	596	9e-31	PREDICTED: human UTX (Ubiquitously transcribed TPR on X) homolog family member (utx-1)-like [Saccoglossus kowalevskii]
Unigene14078_All	596	4e-30	lysine (K)-specific demethylase 6A [Xenopus (Silurana) tropicalis] >gi|189441804|gb|AAI67610.1| LOC100170558 protein [Xenopus (Silurana) tropicalis]
Unigene14078_All	596	7e-30	PREDICTED: lysine (K)-specific demethylase 6A isoform 3 [Bos taurus]
Unigene14078_All	596	7e-30	PREDICTED: lysine (K)-specific demethylase 6A isoform 2 [Bos taurus]
Unigene14078_All	596	7e-30	PREDICTED: lysine (K)-specific demethylase 6A isoform 1 [Bos taurus]
Unigene14078_All	596	7e-30	UTX protein [Homo sapiens]
Unigene14078_All	596	7e-30	UTX protein [Homo sapiens]
Unigene14078_All	596	7e-30	UTX protein [Homo sapiens]
Unigene14078_All	596	7e-30	PREDICTED: lysine (K)-specific demethylase 6A isoform 4 [Bos taurus]
Unigene14078_All	596	7e-30	ubiquitously transcribed tetratricopeptide repeat gene, X chromosome, isoform CRA_b [Mus musculus]
Unigene14078_All	596	7e-30	ubiquitously transcribed tetratricopeptide repeat gene, X chromosome, isoform CRA_a [Mus musculus]
Unigene14078_All	596	7e-30	ubiquitously transcribed tetratricopeptide repeat gene, X chromosome, isoform CRA_c [Mus musculus]
Unigene14078_All	596	7e-30	RecName: Full=Lysine-specific demethylase 6A; AltName: Full=Histone demethylase UTX; AltName: Full=Ubiquitously transcribed X chromosome tetratricopeptide repeat protein; AltName: Full=Ubiquitously transcribed TPR protein on the X chromosome >gi|123208415|emb|CAM18408.1| ubiquitously transcribed tetratricopeptide repeat gene, X chromosome [Mus musculus] >gi|123209608|emb|CAM27157.1| ubiquitously …
Unigene14079_All	678	3e-26	PREDICTED: similar to RH33661p [Nasonia vitripennis]
Unigene14079_All	678	3e-25	PREDICTED: similar to CG12948-PA [Apis mellifera]
Unigene14079_All	678	6e-25	PREDICTED: similar to AGAP004150-PA [Acyrthosiphon pisum]
Unigene14079_All	678	8e-24	PREDICTED: similar to CG12948 CG12948-PA [Tribolium castaneum]
Unigene14079_All	678	2e-19	AGAP004150-PA [Anopheles gambiae str. PEST] >gi|157017589|gb|EAL40654.3| AGAP004150-PA [Anopheles gambiae str. PEST]
Unigene14079_All	678	9e-18	GK11129 [Drosophila willistoni] >gi|194166344|gb|EDW81245.1| GK11129 [Drosophila willistoni]
Unigene14079_All	678	2e-17	GA11931 [Drosophila pseudoobscura pseudoobscura] >gi|198131757|gb|EAL27736.2| GA11931 [Drosophila pseudoobscura pseudoobscura]
Unigene14079_All	678	2e-17	GL23237 [Drosophila persimilis] >gi|194102678|gb|EDW24721.1| GL23237 [Drosophila persimilis]
Unigene14079_All	678	1e-15	GF23195 [Drosophila ananassae] >gi|190614741|gb|EDV30265.1| GF23195 [Drosophila ananassae]
Unigene14079_All	678	2e-15	GI24875 [Drosophila mojavensis] >gi|193916647|gb|EDW15514.1| GI24875 [Drosophila mojavensis]
Unigene14079_All	678	3e-15	GE24737 [Drosophila yakuba] >gi|194183103|gb|EDW96714.1| GE24737 [Drosophila yakuba]
Unigene14079_All	678	3e-15	GH14271 [Drosophila grimshawi] >gi|193892527|gb|EDV91393.1| GH14271 [Drosophila grimshawi]
Unigene14079_All	678	4e-15	GG17332 [Drosophila erecta] >gi|190652466|gb|EDV49721.1| GG17332 [Drosophila erecta]
Unigene14079_All	678	4e-15	RH33661p [Drosophila melanogaster]
Unigene14079_All	678	4e-15	CG12948 [Drosophila melanogaster] >gi|7299241|gb|AAF54437.1| CG12948 [Drosophila melanogaster] >gi|162944720|gb|ABY20429.1| FI02086p [Drosophila melanogaster]
Unigene14079_All	678	5e-15	GJ24519 [Drosophila virilis] >gi|194152637|gb|EDW68071.1| GJ24519 [Drosophila virilis]
Unigene14079_All	678	9e-15	GM26219 [Drosophila sechellia] >gi|194120782|gb|EDW42825.1| GM26219 [Drosophila sechellia]
Unigene14079_All	678	2e-14	GD20764 [Drosophila simulans] >gi|194199997|gb|EDX13573.1| GD20764 [Drosophila simulans]
Unigene14079_All	678	1e-09	PREDICTED: similar to 1700123O20Rik protein [Monodelphis domestica]
Unigene14079_All	678	2e-09	PREDICTED: similar to 1700123O20Rik protein [Ornithorhynchus anatinus]
Unigene14080_All	1072	1e-101	PREDICTED: similar to GA11009-PA [Nasonia vitripennis]
Unigene14080_All	1072	1e-98	PREDICTED: similar to CG11448-PA [Apis mellifera]
Unigene14080_All	1072	1e-88	PREDICTED: similar to GA11009-PA [Tribolium castaneum]
Unigene14080_All	1072	2e-84	PREDICTED: similar to GA11009-PA [Acyrthosiphon pisum]
Unigene14080_All	1072	1e-70	GH24880 [Drosophila grimshawi] >gi|193893508|gb|EDV92374.1| GH24880 [Drosophila grimshawi]
Unigene14080_All	1072	4e-70	GI15695 [Drosophila mojavensis] >gi|193908487|gb|EDW07354.1| GI15695 [Drosophila mojavensis]
Unigene14080_All	1072	2e-69	GJ15229 [Drosophila virilis] >gi|194141658|gb|EDW58075.1| GJ15229 [Drosophila virilis]
Unigene14080_All	1072	5e-69	GM19135 [Drosophila sechellia] >gi|194121775|gb|EDW43818.1| GM19135 [Drosophila sechellia]
Unigene14080_All	1072	5e-69	GF21015 [Drosophila ananassae] >gi|190618819|gb|EDV34343.1| GF21015 [Drosophila ananassae]
Unigene14080_All	1072	8e-69	GA11009 [Drosophila pseudoobscura pseudoobscura] >gi|198145689|gb|EAL32503.2| GA11009 [Drosophila pseudoobscura pseudoobscura]
Unigene14080_All	1072	1e-68	GK16318 [Drosophila willistoni] >gi|194171282|gb|EDW86183.1| GK16318 [Drosophila willistoni]
Unigene14080_All	1072	2e-68	GE16686 [Drosophila yakuba] >gi|194187312|gb|EDX00896.1| GE16686 [Drosophila yakuba]
Unigene14080_All	1072	2e-68	CG11448 [Drosophila melanogaster] >gi|74893562|sp|O76878.1|RIPL_DROME RecName: Full=RILP-like protein homolog >gi|3219569|emb|CAA19654.1| EG:132E8.4 [Drosophila melanogaster] >gi|7290155|gb|AAF45619.1| CG11448 [Drosophila melanogaster] >gi|16648230|gb|AAL25380.1| GH23825p [Drosophila melanogaster] >gi|220947180|gb|ACL86133.1| CG11448-PA [synthetic construct] >gi|220956706|gb|ACL90896.1| CG11448-P…
Unigene14080_All	1072	2e-68	GG12852 [Drosophila erecta] >gi|190648178|gb|EDV45471.1| GG12852 [Drosophila erecta]
Unigene14080_All	1072	2e-63	AGAP005040-PA [Anopheles gambiae str. PEST] >gi|157016988|gb|EAA09406.4| AGAP005040-PA [Anopheles gambiae str. PEST]
Unigene14080_All	1072	2e-57	PREDICTED: similar to FLJ39378 protein isoform 1 [Gallus gallus]
Unigene14080_All	1072	2e-57	PREDICTED: similar to FLJ39378 protein isoform 2 [Gallus gallus]
Unigene14080_All	1072	2e-56	PREDICTED: RILP-like protein 1-like [Ailuropoda melanoleuca]
Unigene14080_All	1072	2e-56	RILP-like protein 1 [Homo sapiens] >gi|74736071|sp|Q5EBL4.1|RIPL1_HUMAN RecName: Full=RILP-like protein 1; AltName: Full=Rab-interacting lysosomal-like protein 1 >gi|59807844|gb|AAH89444.1| RILPL1 protein [Homo sapiens]
Unigene14080_All	1072	2e-56	PREDICTED: similar to CG11448-PA [Canis familiaris]
Unigene14081_All	1135	8e-62	GJ13895 [Drosophila virilis] >gi|194155464|gb|EDW70648.1| GJ13895 [Drosophila virilis]
Unigene14081_All	1135	1e-61	GI13146 [Drosophila mojavensis] >gi|193919406|gb|EDW18273.1| GI13146 [Drosophila mojavensis]
Unigene14081_All	1135	2e-60	GA20886 [Drosophila pseudoobscura pseudoobscura] >gi|198150933|gb|EAL30011.2| GA20886 [Drosophila pseudoobscura pseudoobscura]
Unigene14081_All	1135	2e-60	GL18046 [Drosophila persimilis] >gi|194108428|gb|EDW30471.1| GL18046 [Drosophila persimilis]
Unigene14081_All	1135	6e-59	ribonuclease [Glossina morsitans morsitans]
Unigene14081_All	1135	5e-58	GF23803 [Drosophila ananassae] >gi|190625156|gb|EDV40680.1| GF23803 [Drosophila ananassae]
Unigene14081_All	1135	9e-58	GH14984 [Drosophila grimshawi] >gi|193897996|gb|EDV96862.1| GH14984 [Drosophila grimshawi]
Unigene14081_All	1135	5e-57	GK20586 [Drosophila willistoni] >gi|194164725|gb|EDW79626.1| GK20586 [Drosophila willistoni]
Unigene14081_All	1135	6e-57	RE50319p [Drosophila melanogaster]
Unigene14081_All	1135	6e-57	GH08338p [Drosophila melanogaster]
Unigene14081_All	1135	6e-57	DmRNase-66B [Drosophila melanogaster]
Unigene14081_All	1135	6e-57	ribonuclease X25 [Drosophila melanogaster] >gi|7295178|gb|AAF50502.1| ribonuclease X25 [Drosophila melanogaster]
Unigene14081_All	1135	1e-56	RNaseX25 [Drosophila simulans] >gi|194196047|gb|EDX09623.1| RNaseX25 [Drosophila simulans]
Unigene14081_All	1135	1e-56	GG14458 [Drosophila erecta] >gi|190653173|gb|EDV50416.1| GG14458 [Drosophila erecta]
Unigene14081_All	1135	1e-56	GM25008 [Drosophila sechellia] >gi|194118587|gb|EDW40630.1| GM25008 [Drosophila sechellia]
Unigene14081_All	1135	3e-56	GE21648 [Drosophila yakuba] >gi|194180204|gb|EDW93815.1| GE21648 [Drosophila yakuba]
Unigene14081_All	1135	1e-55	ribonuclease t2 [Aedes aegypti] >gi|94468968|gb|ABF18333.1| ribonuclease T2 family [Aedes aegypti] >gi|108883487|gb|EAT47712.1| ribonuclease t2 [Aedes aegypti]
Unigene14081_All	1135	4e-52	ribonuclease t2 [Culex quinquefasciatus] >gi|167871494|gb|EDS34877.1| ribonuclease t2 [Culex quinquefasciatus]
Unigene14081_All	1135	8e-51	PREDICTED: similar to ribonuclease t2 [Acyrthosiphon pisum]
Unigene14081_All	1135	1e-47	PREDICTED: similar to Ribonuclease X25 CG8194-PA isoform 2 [Tribolium castaneum]
Unigene14085_All	632	6e-49	PREDICTED: similar to synaptic vesicle protein [Tribolium castaneum]
Unigene14085_All	632	1e-47	synaptic vesicle protein [Culex quinquefasciatus] >gi|167872821|gb|EDS36204.1| synaptic vesicle protein [Culex quinquefasciatus]
Unigene14085_All	632	2e-47	synaptic vesicle protein [Aedes aegypti] >gi|108871532|gb|EAT35757.1| synaptic vesicle protein [Aedes aegypti]
Unigene14085_All	632	3e-45	AGAP000128-PA [Anopheles gambiae str. PEST] >gi|157018971|gb|EAA06762.4| AGAP000128-PA [Anopheles gambiae str. PEST]
Unigene14085_All	632	4e-44	PREDICTED: similar to synaptic vesicle protein [Nasonia vitripennis]
Unigene14085_All	632	4e-38	PREDICTED: similar to synaptic vesicle protein [Acyrthosiphon pisum]
Unigene14085_All	632	8e-31	PREDICTED: similar to synaptic vesicle protein, partial [Acyrthosiphon pisum]
Unigene14085_All	632	5e-30	PREDICTED: similar to synaptic vesicle protein [Acyrthosiphon pisum]
Unigene14085_All	632	8e-30	PREDICTED: similar to synaptic vesicle protein [Acyrthosiphon pisum]
Unigene14085_All	632	9e-29	PREDICTED: similar to synaptic vesicle protein [Acyrthosiphon pisum]
Unigene14085_All	632	1e-27	PREDICTED: similar to synaptic vesicle protein [Acyrthosiphon pisum]
[truncated: 467,051+ more rows]
