# Supplementary material for: Transcriptome and Comparative Gene Expression Analysis of Sogatella furcifera (Horváth) in Response to Southern Rice Black-Streaked Dwarf Virus
Source: PLoS One. 2012 Apr 27;7(4):e36238. doi: 10.1371/journal.pone.0036238 (PMC3338671; doi:10.1371/journal.pone.0036238)
Supplement: Table S3 — Combined GO analysis of transcriptome provided by Blast2Go and InterProScan. (XLS) [file pone.0036238.s003.xls]

## Sheet: 复件 All-Unigene.fa.GO2gene
Ontology	Class	number_of_All-Unigene	genes_of_All-Unigene
biological_process	anatomical structure formation	428	Unigene17428_All;Unigene2453_All;Unigene39467_All;Unigene53915_All;Unigene74769_All;Unigene11134_All;Unigene12174_All;Unigene12552_All;Unigene18135_All;Unigene21200_All;Unigene22134_All;Unigene501_All;Unigene53450_All;Unigene56798_All;Unigene57446_All;Unigene60498_All;Unigene63125_All;Unigene63916_All;Unigene81_All;Unigene1013_All;Unigene11094_All;Unigene12171_All;Unigene12757_All;Unigene14893_Al…
biological_process	biological adhesion	104	Unigene40523_All;Unigene10648_All;Unigene11933_All;Unigene18284_All;Unigene18472_All;Unigene18822_All;Unigene22045_All;Unigene22189_All;Unigene25413_All;Unigene259_All;Unigene26978_All;Unigene28730_All;Unigene34717_All;Unigene35558_All;Unigene41868_All;Unigene4275_All;Unigene43163_All;Unigene46407_All;Unigene47645_All;Unigene53753_All;Unigene54202_All;Unigene55024_All;Unigene5621_All;Unigene60481…
biological_process	biological regulation	2083	Unigene60965_All;Unigene10329_All;Unigene1097_All;Unigene16023_All;Unigene29252_All;Unigene2949_All;Unigene30445_All;Unigene35673_All;Unigene45856_All;Unigene55447_All;Unigene10107_All;Unigene18627_All;Unigene32220_All;Unigene4457_All;Unigene58223_All;Unigene60538_All;Unigene71811_All;Unigene7316_All;Unigene79810_All;Unigene80545_All;Unigene30838_All;Unigene32968_All;Unigene5305_All;Unigene70803_…
79_All;Unigene34703_All;Unigene39563_All;Unigene4335_All;Unigene45487_All;Unigene46831_All;Unigene46992_All;Unigene50947_All;Unigene53439_All;Unigene54633_All;Unigene54935_All;Unigene55024_All;Unigene55479_All;Unigene58047_All;Unigene63030_All;Unigene63123_All;Unigene63773_All;Unigene63949_All;Unigene66544_All;Unigene6703_All;Unigene67772_All;Unigene69536_All;Unigene7185_All;Unigene73194_All;Unig…
biological_process	cell killing	4	Unigene16627_All;Unigene59890_All;Unigene60365_All;Unigene41747_All
biological_process	cellular component biogenesis	391	Unigene2227_All;Unigene17428_All;Unigene2453_All;Unigene39467_All;Unigene53915_All;Unigene74769_All;Unigene18550_All;Unigene73744_All;Unigene2356_All;Unigene25005_All;Unigene1272_All;Unigene11134_All;Unigene1013_All;Unigene11094_All;Unigene12171_All;Unigene12757_All;Unigene14893_All;Unigene228_All;Unigene25970_All;Unigene54658_All;Unigene58468_All;Unigene5882_All;Unigene63732_All;Unigene69501_All…
biological_process	cellular component organization	1512	Unigene1035_All;Unigene11751_All;Unigene12034_All;Unigene12958_All;Unigene13280_All;Unigene16107_All;Unigene19386_All;Unigene37862_All;Unigene501_All;Unigene63110_All;Unigene63761_All;Unigene68077_All;Unigene6898_All;Unigene70835_All;Unigene7342_All;Unigene81041_All;Unigene11957_All;Unigene59273_All;Unigene1980_All;Unigene10192_All;Unigene10633_All;Unigene11274_All;Unigene11320_All;Unigene11761_A…
biological_process	cellular process	5141	Unigene60965_All;Unigene2227_All;Unigene11416_All;Unigene14117_All;Unigene14465_All;Unigene17277_All;Unigene36976_All;Unigene1035_All;Unigene11751_All;Unigene12034_All;Unigene12958_All;Unigene13280_All;Unigene16107_All;Unigene19386_All;Unigene37862_All;Unigene501_All;Unigene63110_All;Unigene63761_All;Unigene68077_All;Unigene6898_All;Unigene70835_All;Unigene7342_All;Unigene81041_All;Unigene10329_A…
ene35442_All;Unigene35572_All;Unigene35617_All;Unigene35852_All;Unigene36609_All;Unigene36778_All;Unigene36971_All;Unigene37282_All;Unigene388_All;Unigene39114_All;Unigene39198_All;Unigene39762_All;Unigene39763_All;Unigene39797_All;Unigene398_All;Unigene41500_All;Unigene42101_All;Unigene4264_All;Unigene42797_All;Unigene43162_All;Unigene43621_All;Unigene43838_All;Unigene4431_All;Unigene44424_All;U…
4677_All;Unigene54785_All;Unigene54863_All;Unigene54947_All;Unigene55028_All;Unigene55170_All;Unigene55230_All;Unigene55317_All;Unigene55475_All;Unigene5570_All;Unigene5600_All;Unigene5651_All;Unigene56722_All;Unigene5717_All;Unigene57201_All;Unigene57224_All;Unigene57477_All;Unigene58067_All;Unigene58092_All;Unigene58357_All;Unigene58999_All;Unigene59199_All;Unigene59205_All;Unigene59395_All;Uni…
biological_process	death	385	Unigene41747_All;Unigene42143_All;Unigene6603_All;Unigene10044_All;Unigene10128_All;Unigene10613_All;Unigene11084_All;Unigene11294_All;Unigene1135_All;Unigene11506_All;Unigene11594_All;Unigene11604_All;Unigene11732_All;Unigene11880_All;Unigene12271_All;Unigene12691_All;Unigene12898_All;Unigene13982_All;Unigene14531_All;Unigene14635_All;Unigene14918_All;Unigene16203_All;Unigene16387_All;Unigene164…
biological_process	developmental process	1942	Unigene10588_All;Unigene5413_All;Unigene73416_All;Unigene12932_All;Unigene18442_All;Unigene22713_All;Unigene49257_All;Unigene58444_All;Unigene69448_All;Unigene70371_All;Unigene77348_All;Unigene81058_All;Unigene12174_All;Unigene12552_All;Unigene18135_All;Unigene21200_All;Unigene22134_All;Unigene501_All;Unigene53450_All;Unigene56798_All;Unigene57446_All;Unigene60498_All;Unigene63125_All;Unigene6391…
biological_process	establishment of localization	1370	Unigene12636_All;Unigene337_All;Unigene34536_All;Unigene46887_All;Unigene56492_All;Unigene57236_All;Unigene60345_All;Unigene7325_All;Unigene18117_All;Unigene37165_All;Unigene4462_All;Unigene49807_All;Unigene52478_All;Unigene75500_All;Unigene78052_All;Unigene78476_All;Unigene79755_All;Unigene80829_All;Unigene2227_All;Unigene11416_All;Unigene14117_All;Unigene14465_All;Unigene17277_All;Unigene36976_…
biological_process	growth	217	Unigene24553_All;Unigene25795_All;Unigene29181_All;Unigene33094_All;Unigene35630_All;Unigene53233_All;Unigene56730_All;Unigene56755_All;Unigene59654_All;Unigene76115_All;Unigene11880_All;Unigene14064_All;Unigene59_All;Unigene74860_All;Unigene39665_All;Unigene54202_All;Unigene12045_All;Unigene12399_All;Unigene16891_All;Unigene22134_All;Unigene233_All;Unigene28134_All;Unigene30640_All;Unigene30952_…
biological_process	immune system process	240	Unigene56798_All;Unigene16627_All;Unigene59890_All;Unigene60365_All;Unigene41747_All;Unigene14529_All;Unigene10107_All;Unigene33092_All;Unigene46136_All;Unigene52415_All;Unigene54541_All;Unigene60019_All;Unigene60965_All;Unigene72950_All;Unigene75948_All;Unigene71648_All;Unigene10320_All;Unigene26044_All;Unigene52390_All;Unigene55082_All;Unigene62992_All;Unigene7440_All;Unigene11746_All;Unigene14…
biological_process	localization	1745	Unigene12636_All;Unigene337_All;Unigene34536_All;Unigene46887_All;Unigene56492_All;Unigene57236_All;Unigene60345_All;Unigene7325_All;Unigene18117_All;Unigene37165_All;Unigene4462_All;Unigene49807_All;Unigene52478_All;Unigene75500_All;Unigene78052_All;Unigene78476_All;Unigene79755_All;Unigene80829_All;Unigene2227_All;Unigene11416_All;Unigene14117_All;Unigene14465_All;Unigene17277_All;Unigene36976_…
biological_process	locomotion	299	Unigene10868_All;Unigene12409_All;Unigene28201_All;Unigene30495_All;Unigene32160_All;Unigene34731_All;Unigene35734_All;Unigene4174_All;Unigene48441_All;Unigene50313_All;Unigene58466_All;Unigene59240_All;Unigene69898_All;Unigene78441_All;Unigene80554_All;Unigene18472_All;Unigene77348_All;Unigene12281_All;Unigene13253_All;Unigene26964_All;Unigene40923_All;Unigene72917_All;Unigene80697_All;Unigene11…
biological_process	metabolic process	4064	Unigene60965_All;Unigene30838_All;Unigene32968_All;Unigene5305_All;Unigene70803_All;Unigene80477_All;Unigene80548_All;Unigene11494_All;Unigene19281_All;Unigene65_All;Unigene72431_All;Unigene75502_All;Unigene10500_All;Unigene2937_All;Unigene528_All;Unigene60168_All;Unigene7257_All;Unigene76035_All;Unigene11292_All;Unigene1031_All;Unigene10457_All;Unigene11334_All;Unigene11973_All;Unigene12271_All;…
e29404_All;Unigene30936_All;Unigene31992_All;Unigene34363_All;Unigene40690_All;Unigene43611_All;Unigene52255_All;Unigene53226_All;Unigene54043_All;Unigene54172_All;Unigene60250_All;Unigene69700_All;Unigene72634_All;Unigene7384_All;Unigene75941_All;Unigene78970_All;Unigene43894_All;Unigene25884_All;Unigene31163_All;Unigene7242_All;Unigene18300_All;Unigene23466_All;Unigene49161_All;Unigene53188_All…
5_All;Unigene49719_All;Unigene74337_All;Unigene10644_All;Unigene12464_All;Unigene18326_All;Unigene18500_All;Unigene35616_All;Unigene35622_All;Unigene39027_All;Unigene4219_All;Unigene50531_All;Unigene52598_All;Unigene63419_All;Unigene6825_All;Unigene81116_All;Unigene8574_All;Unigene970_All;Unigene77254_All;Unigene10436_All;Unigene10633_All;Unigene1081_All;Unigene11033_All;Unigene11124_All;Unigene1…
biological_process	multi-organism process	254	Unigene76482_All;Unigene59890_All;Unigene10128_All;Unigene10390_All;Unigene11015_All;Unigene11450_All;Unigene11486_All;Unigene11966_All;Unigene12628_All;Unigene12691_All;Unigene12898_All;Unigene12907_All;Unigene1304_All;Unigene14063_All;Unigene14453_All;Unigene14635_All;Unigene14918_All;Unigene16203_All;Unigene16387_All;Unigene21399_All;Unigene23749_All;Unigene23949_All;Unigene24676_All;Unigene27…
biological_process	multicellular organismal process	2090	Unigene1031_All;Unigene10457_All;Unigene11334_All;Unigene11973_All;Unigene12271_All;Unigene14430_All;Unigene18141_All;Unigene2270_All;Unigene29452_All;Unigene34877_All;Unigene36492_All;Unigene450_All;Unigene52171_All;Unigene52769_All;Unigene55318_All;Unigene56538_All;Unigene58312_All;Unigene59902_All;Unigene6879_All;Unigene6953_All;Unigene70099_All;Unigene70888_All;Unigene71959_All;Unigene12932_A…
Unigene1021_All;Unigene14225_All;Unigene16842_All;Unigene32549_All;Unigene18414_All;Unigene2109_All;Unigene4062_All;Unigene63148_All;Unigene9833_All;Unigene14590_All;Unigene4501_All;Unigene10543_All;Unigene11373_All;Unigene11447_All;Unigene11916_All;Unigene14816_All;Unigene15954_All;Unigene16351_All;Unigene16604_All;Unigene16836_All;Unigene17164_All;Unigene17244_All;Unigene18229_All;Unigene21200_…
biological_process	pigmentation	1779	Unigene60965_All;Unigene10329_All;Unigene1097_All;Unigene16023_All;Unigene29252_All;Unigene2949_All;Unigene30445_All;Unigene35673_All;Unigene45856_All;Unigene55447_All;Unigene10107_All;Unigene18627_All;Unigene32220_All;Unigene4457_All;Unigene58223_All;Unigene60538_All;Unigene71811_All;Unigene7316_All;Unigene79810_All;Unigene80545_All;Unigene30838_All;Unigene32968_All;Unigene5305_All;Unigene70803_…
biological_process	reproduction	499	Unigene17306_All;Unigene19002_All;Unigene66123_All;Unigene70451_All;Unigene74091_All;Unigene21696_All;Unigene10021_All;Unigene1028_All;Unigene1036_All;Unigene10619_All;Unigene10648_All;Unigene11030_All;Unigene11060_All;Unigene11274_All;Unigene11671_All;Unigene11732_All;Unigene11987_All;Unigene12083_All;Unigene12174_All;Unigene12358_All;Unigene12757_All;Unigene12907_All;Unigene14013_All;Unigene140…
biological_process	reproductive process	488	Unigene21696_All;Unigene10021_All;Unigene1028_All;Unigene1036_All;Unigene10619_All;Unigene10648_All;Unigene11030_All;Unigene11060_All;Unigene11274_All;Unigene11671_All;Unigene11732_All;Unigene11987_All;Unigene12083_All;Unigene12174_All;Unigene12358_All;Unigene12757_All;Unigene12907_All;Unigene14013_All;Unigene14063_All;Unigene14240_All;Unigene16016_All;Unigene205_All;Unigene2184_All;Unigene2319_A…
biological_process	response to stimulus	1214	Unigene10107_All;Unigene18627_All;Unigene32220_All;Unigene4457_All;Unigene58223_All;Unigene60538_All;Unigene71811_All;Unigene7316_All;Unigene79810_All;Unigene80545_All;Unigene12270_All;Unigene42143_All;Unigene54673_All;Unigene6603_All;Unigene6798_All;Unigene70258_All;Unigene81039_All;Unigene28152_All;Unigene5156_All;Unigene56916_All;Unigene74756_All;Unigene77427_All;Unigene79847_All;Unigene11716_…
biological_process	rhythmic process	31	Unigene21696_All;Unigene18920_All;Unigene20660_All;Unigene24990_All;Unigene26265_All;Unigene30815_All;Unigene31029_All;Unigene31128_All;Unigene36673_All;Unigene58371_All;Unigene60734_All;Unigene29452_All;Unigene450_All;Unigene52171_All;Unigene70888_All;Unigene60584_All;Unigene70855_All;Unigene2550_All;Unigene39627_All;Unigene1037_All;Unigene1068_All;Unigene14623_All;Unigene18153_All;Unigene18748_…
biological_process	viral reproduction	13	Unigene12287_All;Unigene4154_All;Unigene46695_All;Unigene46136_All;Unigene52415_All;Unigene54541_All;Unigene63557_All;Unigene73568_All;Unigene38304_All;Unigene68128_All;Unigene32686_All;Unigene32968_All;Unigene80548_All
cellular_component	cell	5872	Unigene10173_All;Unigene13940_All;Unigene60231_All;Unigene17312_All;Unigene4372_All;Unigene59856_All;Unigene76762_All;Unigene81230_All;Unigene60229_All;Unigene63415_All;Unigene7316_All;Unigene12587_All;Unigene16603_All;Unigene18038_All;Unigene27088_All;Unigene29048_All;Unigene34755_All;Unigene361_All;Unigene4457_All;Unigene4486_All;Unigene47090_All;Unigene52993_All;Unigene53837_All;Unigene58005_A…
All;Unigene14064_All;Unigene14243_All;Unigene14418_All;Unigene14482_All;Unigene14549_All;Unigene14561_All;Unigene14565_All;Unigene14624_All;Unigene14665_All;Unigene14876_All;Unigene14925_All;Unigene16038_All;Unigene16103_All;Unigene16269_All;Unigene16294_All;Unigene16370_All;Unigene16397_All;Unigene16586_All;Unigene168_All;Unigene16906_All;Unigene16923_All;Unigene16_All;Unigene17361_All;Unigene18…
;Unigene13054_All;Unigene1311_All;Unigene1319_All;Unigene13302_All;Unigene13332_All;Unigene13482_All;Unigene13497_All;Unigene13516_All;Unigene13965_All;Unigene1398_All;Unigene14049_All;Unigene14107_All;Unigene14228_All;Unigene14242_All;Unigene14310_All;Unigene14320_All;Unigene14323_All;Unigene14379_All;Unigene14409_All;Unigene14430_All;Unigene14442_All;Unigene14553_All;Unigene14584_All;Unigene145…
Unigene11890_All;Unigene2076_All;Unigene5288_All;Unigene77571_All;Unigene29073_All;Unigene13972_All;Unigene14331_All;Unigene28937_All;Unigene43613_All;Unigene60214_All;Unigene66712_All;Unigene9941_All;Unigene14156_All;Unigene14849_All;Unigene23612_All;Unigene28679_All;Unigene30840_All;Unigene45670_All;Unigene5359_All;Unigene63363_All;Unigene67951_All;Unigene8808_All;Unigene18027_All
cellular_component	cell part	5872	Unigene10173_All;Unigene13940_All;Unigene60231_All;Unigene17312_All;Unigene4372_All;Unigene59856_All;Unigene76762_All;Unigene81230_All;Unigene60229_All;Unigene63415_All;Unigene7316_All;Unigene12587_All;Unigene16603_All;Unigene18038_All;Unigene27088_All;Unigene29048_All;Unigene34755_All;Unigene361_All;Unigene4457_All;Unigene4486_All;Unigene47090_All;Unigene52993_All;Unigene53837_All;Unigene58005_A…
All;Unigene14064_All;Unigene14243_All;Unigene14418_All;Unigene14482_All;Unigene14549_All;Unigene14561_All;Unigene14565_All;Unigene14624_All;Unigene14665_All;Unigene14876_All;Unigene14925_All;Unigene16038_All;Unigene16103_All;Unigene16269_All;Unigene16294_All;Unigene16370_All;Unigene16397_All;Unigene16586_All;Unigene168_All;Unigene16906_All;Unigene16923_All;Unigene16_All;Unigene17361_All;Unigene18…
;Unigene13054_All;Unigene1311_All;Unigene1319_All;Unigene13302_All;Unigene13332_All;Unigene13482_All;Unigene13497_All;Unigene13516_All;Unigene13965_All;Unigene1398_All;Unigene14049_All;Unigene14107_All;Unigene14228_All;Unigene14242_All;Unigene14310_All;Unigene14320_All;Unigene14323_All;Unigene14379_All;Unigene14409_All;Unigene14430_All;Unigene14442_All;Unigene14553_All;Unigene14584_All;Unigene145…
Unigene11890_All;Unigene2076_All;Unigene5288_All;Unigene77571_All;Unigene29073_All;Unigene13972_All;Unigene14331_All;Unigene28937_All;Unigene43613_All;Unigene60214_All;Unigene66712_All;Unigene9941_All;Unigene14156_All;Unigene14849_All;Unigene23612_All;Unigene28679_All;Unigene30840_All;Unigene45670_All;Unigene5359_All;Unigene63363_All;Unigene67951_All;Unigene8808_All;Unigene18027_All
cellular_component	envelope	249	Unigene1037_All;Unigene1068_All;Unigene11247_All;Unigene12125_All;Unigene12163_All;Unigene14465_All;Unigene2354_All;Unigene28105_All;Unigene35610_All;Unigene4064_All;Unigene43154_All;Unigene53524_All;Unigene535_All;Unigene54300_All;Unigene54426_All;Unigene60649_All;Unigene68130_All;Unigene72130_All;Unigene7527_All;Unigene75428_All;Unigene76659_All;Unigene77988_All;Unigene79752_All;Unigene80475_Al…
cellular_component	extracellular region	147	Unigene11808_All;Unigene2016_All;Unigene21902_All;Unigene28407_All;Unigene32059_All;Unigene33068_All;Unigene33356_All;Unigene34208_All;Unigene35816_All;Unigene37944_All;Unigene415_All;Unigene4291_All;Unigene50817_All;Unigene52943_All;Unigene59466_All;Unigene63595_All;Unigene69176_All;Unigene75785_All;Unigene78530_All;Unigene10364_All;Unigene18021_All;Unigene1989_All;Unigene2127_All;Unigene23638_A…
cellular_component	extracellular region part	128	Unigene10364_All;Unigene18021_All;Unigene1989_All;Unigene2127_All;Unigene23638_All;Unigene32593_All;Unigene33939_All;Unigene34228_All;Unigene36561_All;Unigene39547_All;Unigene49371_All;Unigene500_All;Unigene54734_All;Unigene58294_All;Unigene59547_All;Unigene63044_All;Unigene65633_All;Unigene8574_All;Unigene35634_All;Unigene5270_All;Unigene69195_All;Unigene6948_All;Unigene11747_All;Unigene14676_Al…
cellular_component	macromolecular complex	1408	Unigene10173_All;Unigene13940_All;Unigene60231_All;Unigene60229_All;Unigene63415_All;Unigene7316_All;Unigene12587_All;Unigene16603_All;Unigene18038_All;Unigene27088_All;Unigene29048_All;Unigene34755_All;Unigene361_All;Unigene4457_All;Unigene4486_All;Unigene47090_All;Unigene52993_All;Unigene53837_All;Unigene58005_All;Unigene63257_All;Unigene6774_All;Unigene68371_All;Unigene6898_All;Unigene7503_All…
cellular_component	membrane-enclosed lumen	479	Unigene10173_All;Unigene13940_All;Unigene60231_All;Unigene11120_All;Unigene43517_All;Unigene10799_All;Unigene13139_All;Unigene14147_All;Unigene15960_All;Unigene16023_All;Unigene17408_All;Unigene17419_All;Unigene18184_All;Unigene2192_All;Unigene24046_All;Unigene2614_All;Unigene26282_All;Unigene26340_All;Unigene26963_All;Unigene32388_All;Unigene35691_All;Unigene389_All;Unigene40617_All;Unigene4332_…
cellular_component	organelle	3361	Unigene10173_All;Unigene13940_All;Unigene60231_All;Unigene17312_All;Unigene4372_All;Unigene59856_All;Unigene76762_All;Unigene81230_All;Unigene12587_All;Unigene16603_All;Unigene18038_All;Unigene27088_All;Unigene29048_All;Unigene34755_All;Unigene361_All;Unigene4457_All;Unigene4486_All;Unigene47090_All;Unigene52993_All;Unigene53837_All;Unigene58005_All;Unigene63257_All;Unigene6774_All;Unigene68371_A…
Unigene94_All;Unigene978_All;Unigene9943_All;Unigene9969_All;Unigene11734_All;Unigene12552_All;Unigene25866_All;Unigene5156_All;Unigene52737_All;Unigene63903_All;Unigene67982_All;Unigene70217_All;Unigene72185_All;Unigene7468_All;Unigene77427_All;Unigene9783_All;Unigene35501_All;Unigene449_All;Unigene60958_All;Unigene62981_All;Unigene77357_All;Unigene78984_All;Unigene80845_All;Unigene54860_All;Uni…
cellular_component	organelle part	1575	Unigene10173_All;Unigene13940_All;Unigene60231_All;Unigene17312_All;Unigene4372_All;Unigene59856_All;Unigene76762_All;Unigene81230_All;Unigene12587_All;Unigene16603_All;Unigene18038_All;Unigene27088_All;Unigene29048_All;Unigene34755_All;Unigene361_All;Unigene4457_All;Unigene4486_All;Unigene47090_All;Unigene52993_All;Unigene53837_All;Unigene58005_All;Unigene63257_All;Unigene6774_All;Unigene68371_A…
cellular_component	synapse	46	Unigene14775_All;Unigene29829_All;Unigene34261_All;Unigene45143_All;Unigene45281_All;Unigene56787_All;Unigene59221_All;Unigene63006_All;Unigene10760_All;Unigene4372_All;Unigene46668_All;Unigene11134_All;Unigene16891_All;Unigene28134_All;Unigene403_All;Unigene4264_All;Unigene46056_All;Unigene56790_All;Unigene57152_All;Unigene70622_All;Unigene7098_All;Unigene75987_All;Unigene81296_All;Unigene12399_…
cellular_component	synapse part	23	Unigene14775_All;Unigene29829_All;Unigene34261_All;Unigene45143_All;Unigene45281_All;Unigene56787_All;Unigene59221_All;Unigene63006_All;Unigene10760_All;Unigene4372_All;Unigene46668_All;Unigene11134_All;Unigene16891_All;Unigene28134_All;Unigene403_All;Unigene4264_All;Unigene46056_All;Unigene56790_All;Unigene57152_All;Unigene70622_All;Unigene7098_All;Unigene75987_All;Unigene81296_All
cellular_component	virion	2	Unigene38304_All;Unigene68128_All
cellular_component	virion part	2	Unigene38304_All;Unigene68128_All
molecular_function	antioxidant activity	34	Unigene10991_All;Unigene11143_All;Unigene25940_All;Unigene2807_All;Unigene2896_All;Unigene4122_All;Unigene60483_All;Unigene6606_All;Unigene70608_All;Unigene7206_All;Unigene7209_All;Unigene72955_All;Unigene73194_All;Unigene76145_All;Unigene77201_All;Unigene79673_All;Unigene10801_All;Unigene11283_All;Unigene12820_All;Unigene14758_All;Unigene18132_All;Unigene18413_All;Unigene22856_All;Unigene5156_Al…
molecular_function	auxiliary transport protein activity	9	Unigene21266_All;Unigene25648_All;Unigene2655_All;Unigene28781_All;Unigene29323_All;Unigene30547_All;Unigene52178_All;Unigene59091_All;Unigene60250_All
molecular_function	binding	5505	Unigene10357_All;Unigene10588_All;Unigene10784_All;Unigene1091_All;Unigene10922_All;Unigene11091_All;Unigene11122_All;Unigene11138_All;Unigene11140_All;Unigene11336_All;Unigene11350_All;Unigene11364_All;Unigene11536_All;Unigene11580_All;Unigene11587_All;Unigene11934_All;Unigene11957_All;Unigene11980_All;Unigene12208_All;Unigene12274_All;Unigene12276_All;Unigene12527_All;Unigene12892_All;Unigene12…
;Unigene31054_All;Unigene31084_All;Unigene31085_All;Unigene31142_All;Unigene311_All;Unigene31231_All;Unigene31235_All;Unigene31250_All;Unigene31295_All;Unigene31319_All;Unigene31339_All;Unigene31404_All;Unigene315_All;Unigene31940_All;Unigene31951_All;Unigene31990_All;Unigene32004_All;Unigene32027_All;Unigene32043_All;Unigene32048_All;Unigene32127_All;Unigene32171_All;Unigene32191_All;Unigene3229…
l;Unigene51849_All;Unigene54022_All;Unigene54667_All;Unigene56596_All;Unigene56946_All;Unigene66205_All;Unigene74860_All;Unigene11087_All;Unigene1115_All;Unigene12860_All;Unigene14600_All;Unigene157_All;Unigene16984_All;Unigene2039_All;Unigene20825_All;Unigene26199_All;Unigene38358_All;Unigene42797_All;Unigene49131_All;Unigene5458_All;Unigene60484_All;Unigene60550_All;Unigene67662_All;Unigene7060…
molecular_function	catalytic activity	3850	Unigene25884_All;Unigene31992_All;Unigene78970_All;Unigene11916_All;Unigene37006_All;Unigene5822_All;Unigene73210_All;Unigene74483_All;Unigene79142_All;Unigene57111_All;Unigene1242_All;Unigene80643_All;Unigene1980_All;Unigene2082_All;Unigene332_All;Unigene4486_All;Unigene10173_All;Unigene11083_All;Unigene11285_All;Unigene11436_All;Unigene12223_All;Unigene13139_All;Unigene13940_All;Unigene14310_Al…
1189_All;Unigene12242_All;Unigene12255_All;Unigene12471_All;Unigene12485_All;Unigene12488_All;Unigene12820_All;Unigene12922_All;Unigene13297_All;Unigene13384_All;Unigene1386_All;Unigene13996_All;Unigene14049_All;Unigene14057_All;Unigene14354_All;Unigene14509_All;Unigene16205_All;Unigene16398_All;Unigene18106_All;Unigene18263_All;Unigene18674_All;Unigene18710_All;Unigene19281_All;Unigene22872_All;…
molecular_function	electron carrier activity	7	Unigene70306_All;Unigene72039_All;Unigene74440_All;Unigene75862_All;Unigene78434_All;Unigene78462_All;Unigene79275_All
molecular_function	enzyme regulator activity	249	Unigene14699_All;Unigene22515_All;Unigene25866_All;Unigene396_All;Unigene46410_All;Unigene55381_All;Unigene59240_All;Unigene81041_All;Unigene12667_All;Unigene17279_All;Unigene11500_All;Unigene1090_All;Unigene13405_All;Unigene25525_All;Unigene27313_All;Unigene27378_All;Unigene32336_All;Unigene34762_All;Unigene54664_All;Unigene5584_All;Unigene77738_All;Unigene12823_All;Unigene45944_All;Unigene79908…
molecular_function	metallochaperone activity	1	Unigene10801_All
molecular_function	molecular transducer activity	474	Unigene53989_All;Unigene18444_All;Unigene42949_All;Unigene56548_All;Unigene66892_All;Unigene4174_All;Unigene16283_All;Unigene18702_All;Unigene26044_All;Unigene28284_All;Unigene45737_All;Unigene52390_All;Unigene56901_All;Unigene55082_All;Unigene62992_All;Unigene10545_All;Unigene12271_All;Unigene12274_All;Unigene21703_All;Unigene24278_All;Unigene25986_All;Unigene3020_All;Unigene33101_All;Unigene358…
molecular_function	structural molecule activity	249	Unigene10051_All;Unigene10085_All;Unigene10261_All;Unigene10324_All;Unigene10371_All;Unigene10383_All;Unigene1058_All;Unigene10653_All;Unigene11139_All;Unigene11295_All;Unigene11945_All;Unigene12213_All;Unigene12879_All;Unigene13234_All;Unigene134_All;Unigene14054_All;Unigene14140_All;Unigene14294_All;Unigene1443_All;Unigene14626_All;Unigene16271_All;Unigene16415_All;Unigene16431_All;Unigene16548…
molecular_function	transcription regulator activity	396	Unigene59035_All;Unigene10128_All;Unigene10799_All;Unigene12898_All;Unigene13139_All;Unigene14147_All;Unigene14228_All;Unigene14531_All;Unigene14635_All;Unigene15960_All;Unigene16203_All;Unigene16387_All;Unigene16492_All;Unigene16683_All;Unigene17408_All;Unigene17419_All;Unigene17998_All;Unigene18680_All;Unigene19694_All;Unigene233_All;Unigene24676_All;Unigene24848_All;Unigene2614_All;Unigene2634…
molecular_function	translation regulator activity	129	Unigene11840_All;Unigene73640_All;Unigene78101_All;Unigene10202_All;Unigene1031_All;Unigene10642_All;Unigene10644_All;Unigene10714_All;Unigene10843_All;Unigene10866_All;Unigene11040_All;Unigene11277_All;Unigene11445_All;Unigene11731_All;Unigene11780_All;Unigene1247_All;Unigene1311_All;Unigene13512_All;Unigene14379_All;Unigene14430_All;Unigene14793_All;Unigene16471_All;Unigene16799_All;Unigene1810…
molecular_function	transporter activity	559	Unigene68433_All;Unigene11863_All;Unigene12279_All;Unigene14060_All;Unigene14183_All;Unigene18049_All;Unigene20815_All;Unigene2122_All;Unigene21517_All;Unigene2394_All;Unigene25335_All;Unigene25866_All;Unigene26036_All;Unigene307_All;Unigene30867_All;Unigene4231_All;Unigene53458_All;Unigene54861_All;Unigene5738_All;Unigene5803_All;Unigene58363_All;Unigene58_All;Unigene59240_All;Unigene63097_All;U…
