# Supplementary material for: Transcriptome and Comparative Gene Expression Analysis of Sogatella furcifera (Horváth) in Response to Southern Rice Black-Streaked Dwarf Virus
Source: PLoS One. 2012 Apr 27;7(4):e36238. doi: 10.1371/journal.pone.0036238 (PMC3338671; doi:10.1371/journal.pone.0036238)
Supplement: Table S7 — Primers used in qRT-PCR for validation of differentially expressed genes. (XLS) [file pone.0036238.s007.xls]

## Sheet: Sheet1
Genes for qRT-PCR	Primers of the gene for qRT-PCR
	Sequence5'_3'
18sRNA-F	ACAAGTATCAATTGGAGGGCAAGTCTGG
18sRNA-R	ATGCACACAGTATACAGGCGTGACAAG
15608-F	AGCGCGCGTTTCATTTGTTACAAGTTCAAG
15608-R	GGGTTCCTTATAGCAGTTTTGAGCCG
2869-F	CTGTTCAATCAATCAGTAGACTCTGGATC
2869-R	CAACTGAACCATCCGGAAATTAATGTGTTC
9921-F	CACATCTGCCCCGGATCGACCTT
9921-R	GCGTTGACTTGGATGGACCAGTTTCT
9668-F	GTTGTAGCCGGGCTTGATAACTCCAT
9668-R	ATGCTCAGATTCCCTCGTTCTACGGA
44764-F	AAGGCGAGTCCCCATTTGAATGCG
44764-R	GAATGAGAGACTGAACCGACCTCTATC
65051-F	TCAGAGATTTGGTCAAACGCTGTAGCTC
65051-R	CAGTGGTTATTTCGTCAATCACTGCCAC
65086-F	CTTGAAGCCGATGGCTGTGGATTAC
65086-R	CTTCATTCTTTCCTCAACTAAGCCGGGT
64888-F	GGTCAACAGAATCAATCGGTCGCTG
64888-R	CGGCTTATCGATCAGATCTATAGTTGGC
7091-F	CTTGAGGATGAGCTTAGCTTGCTCTTC
7091-R	GAATGACTAAGCTTCAGCCAGATCCGA
79567-F	CCGGCTACAAAAGGACTCATGGAC
79567-R	CACCCATAATTCGCCAGACTGTCTTG
13727-F	CACCAGAGAACTTGATCACGTGGACT
13727-R	ACCCATTGTACCAGAACTGGAAAGCCTT
2758-F	ATGGATTCACGGCCCTCAGAGACT
2758-R	CCTCCTGAAGCCAAACGGAACAG
7600-F	CTCACAGTGCAGGACAACCACAAG
7600-R	AGTTGCTCTCACAGTCAGGTAGAACTC
11595-F	TGGTGCCAAGGAGCTAATGAGGCT
11595-R	CGGGAACAAATGTGCCAGAGTTACGAT
79189-F	CTGCAAGCATCTTCATCATAGTAGAAGTAGG
79189-R	TGGAAAAGTGTGTTCGGGAGTTTATTGATC
10450-F	TACCGGCTCACCTGCAGTTGATC
10450-R	GATGCACGTCCCAAAGAGTTGTGTC
2468-F	GAGGAGAAGATTGTTCCTAAATCGCATCG
2468-R	GGCCAACTCGTACGACTCGAAAGT
61191-F	TCCGATAAGCAGAACGAGTACGGC
61191-R	TCATCATTGCCCAGGATCACATCTCG
8547-F	GACATTCACCATCACTTCAACAGTAGCAG
8547-R	ATTCCTGGACGAGGCGAATACTTTCCT
5038-F	CAAATCGGTGAGAAGTTCCTGGAGACT
5038-R	GCAATTACCGATAGAGATGGCGTTCC
12083-F	GGATGTCTGTGATGATCGGCCAATAC
12083-R	CTGACCATTGTAACGCGAGTCAGAGA
68402-F	CGTATTTGAGAACACTGTGCAACTCTGG
68402-R	CTGTGTTCTCAGCACGCTTCATCAATAG
8357-F	CAGAGACCTATTCAGTTCCCTGGTGA
8357-R	ACTCGTCGATCTCATCGAAGCTGTC
11516-F	CTAGGAAGTCTCATTGTAGCTGTACGTC
11516-R	GTTCAGTATCATTCACGCATGCACCG
9190-F	GGAGACAGGTTTATACCTTCAAGGCTGA
9190-R	CTCCCACAGTGGGTTTCTTTCGAG
35268-F	ACCTCCTTCCACAGTTTCAGAGCTG
35268-R	CCAATACCATTAGAAGATGCATCAGTGGC
10565-F	CTGCCATTAATCTTCGTAAAGCTGATCCAG
10565-R	GAGCTTGGAAGAAACATGAAGAGTCAGG
2880-F	CTTGTCCTCTCGTCAATCGTTGATTGC
2880-R	GTTATCTGGCACAATCAGTCCTTGCCA
2472-F	CTTCCCTCTACTCACCCCATTCGT
2472-R	ATTCTCTGGACTCGAGTACACCTCG
12029-F	GAATGGACCAGATCAACGCCGACAT
12029-R	CATGTTCTCCTCCATCTCATCCTCTC
7603-F	TGACAATGATTGCTCGTCTCCACGAC
7603-R	ATCTTCCAGGTATGTGAATGCAAGCCTC
65601-F	GAGACGTTGTGATTATGACCTTGGGTTC
65601-R	CTTCTAACAATCCTTGTCGCCATTCTAGG
15838-F	GAACTCATTGGTGGAAGTGCGATTCC
15838-R	CATGTGAGTTGAAGTCTCCTCCAGAC
3770-F	GGAGAGCTCAGTTCTTTCTCAGACTTC
3770-R	ATTCTTCCTTGGTGGTGTTGGCGAC
64690-F	TGTTTAGCCACCTGCAACCAGCCA
64690-R	ATCTCTGTAACCAGTCTGGCTCACCT
64380-F	GAGAATGGGATTGTACCAGGTACCAGC
64380-R	GTCAACAACATCCCACACCTCAACC
9432-F	CATGGCATTGATGAGCATTCGAGTGAG
9432-R	GGAGACGACGCAAGGAGATGATCT
11397-F	GCATCCGCCAATTGATGACGTCATAAG
11397-R	AGGTTGTGCTGAAGCACGAGATCG
4517-F	ATAGAGCCTTGGTGGCTGGAAGGA
4517-R	TGCTATTCCGTCGCAATGAAGTACGC
13628-F	GGTAACAGATGCTGTTCCAAGTAGAGCT
13628-R	GTCAGTACAACAGGTGGTCGATAATCCT
11805-F	GCACAACCACTTTGCACATGTTCCATC
11805-R	GATGAGCCGCAAACTGTTCCGAACAT
3942-F	CATGTCATAGCACCGAAAACCGGGTT
3942-R	CTATTGATGTGCGTCGACCTCTCTACA
